# Supplementary material
Source: publisher figshare collection journal article supplement (https://diabetesjournals.figshare.com/articles/dataset/_/20080700)
Supplement: Supplementary file 1 [file 1]

**Supplemental Table 6. Immaturity marker genes that are differentially expressed between the *Beta1* and *Beta4* clusters.** Marker genes are based on Qiu et al. (2017). Positive coef depicts higher expression in *Beta4* , whereas negative coef reflects higher expression in *Beta1* .  
Related to Figure 5 .

| Names         | Pr(>Chisq)  | coef        | ci.hi       | ci.lo       | FDR         |
|---------------|-------------|-------------|-------------|-------------|-------------|
| <i>Chgb</i>   | 0           | 1.814386091 | 3.074810032 | 0.553962149 | 0           |
| <i>Gc</i>     | 0           | 1.265047339 | 1.379382279 | 1.150712399 | 0           |
| <i>Rps18</i>  | 0           | 1.06460688  | 1.506681516 | 0.622532244 | 0           |
| <i>Rps2</i>   | 0           | 0.926715577 | 1.398102088 | 0.455329067 | 0           |
| <i>Gnas</i>   | 0           | 0.819776294 | 1.300638617 | 0.338913971 | 0           |
| <i>Rps28</i>  | 5.4456E-293 | 0.796993992 | 1.098336649 | 0.495651334 | 3.9437E-291 |
| <i>Rpl21</i>  | 0           | 0.762406853 | 1.160054313 | 0.364759393 | 0           |
| <i>Rpl29</i>  | 0           | 0.723415728 | 0.901476222 | 0.545355234 | 0           |
| <i>Cox7c</i>  | 0           | 0.709325969 | 1.111927319 | 0.30672462  | 0           |
| <i>Txnip</i>  | 0           | 0.704101107 | 0.978452096 | 0.429750117 | 0           |
| <i>Rpl4</i>   | 0           | 0.655008439 | 1.105961996 | 0.204054882 | 0           |
| <i>Rpl35a</i> | 0           | 0.642933624 | 0.973854677 | 0.312012571 | 0           |
| <i>Rplp0</i>  | 0           | 0.640143402 | 0.779500469 | 0.500786336 | 0           |
| <i>Rpl15</i>  | 0           | 0.624506946 | 0.975182056 | 0.273831836 | 0           |
| <i>Rpsa</i>   | 0           | 0.531751111 | 1.006405266 | 0.057096955 | 0           |
| <i>Rpl41</i>  | 0           | 0.528187151 | 0.65934474  | 0.397029563 | 0           |
| <i>Sec61b</i> | 0           | 0.524337685 | 0.754225521 | 0.294449848 | 0           |
| <i>Rpl18</i>  | 1.6818E-268 | 0.515031283 | 0.941931167 | 0.088131398 | 1.0876E-266 |
| <i>Rps3</i>   | 0           | 0.504810797 | 0.832136413 | 0.177485181 | 0           |
| <i>Rps25</i>  | 3.9098E-294 | 0.50083433  | 0.918920816 | 0.082747843 | 2.8712E-292 |
| <i>Rps16</i>  | 0           | 0.486377512 | 0.772824159 | 0.199930865 | 0           |
| <i>Rps19</i>  | 4.9547E-272 | 0.482328842 | 0.71699427  | 0.247663414 | 3.2716E-270 |
| <i>Rpl17</i>  | 0           | 0.482174951 | 0.745613745 | 0.218736157 | 0           |
| <i>Rpl18a</i> | 9.4701E-289 | 0.480744817 | 0.88170329  | 0.079786344 | 6.7955E-287 |
| <i>Eef1a1</i> | 0           | 0.462152094 | 0.677667737 | 0.246636451 | 0           |
| <i>Rpl23</i>  | 0           | 0.446050499 | 0.624814686 | 0.267286312 | 0           |
| <i>Rpl6</i>   | 0           | 0.433819328 | 0.662717219 | 0.204921436 | 0           |
| <i>Rpl32</i>  | 0           | 0.430262694 | 0.53822965  | 0.322295739 | 0           |

|                |             |             |             |              |             |
|----------------|-------------|-------------|-------------|--------------|-------------|
| <i>Eef1b2</i>  | 0           | 0.424342649 | 0.792049392 | 0.056635906  | 0           |
| <i>Rpl22l1</i> | 3.7866E-69  | 0.414646296 | 0.684048367 | 0.145244225  | 6.79297E-68 |
| <i>Spcs1</i>   | 0           | 0.411944526 | 0.727949793 | 0.095939258  | 0           |
| <i>Rps29</i>   | 0           | 0.402866654 | 0.528986448 | 0.27674686   | 0           |
| <i>Rplp2</i>   | 6.803E-185  | 0.399910042 | 0.678987011 | 0.120833074  | 3.0286E-183 |
| <i>Rps15a</i>  | 1.1847E-172 | 0.395202916 | 0.610808209 | 0.179597623  | 4.7982E-171 |
| <i>Cox6a1</i>  | 1.1803E-195 | 0.37877199  | 0.572930948 | 0.184613033  | 5.6379E-194 |
| <i>Rps26</i>   | 1.7875E-149 | 0.37673159  | 0.755577703 | -0.002114523 | 6.341E-148  |
| <i>Rps11</i>   | 0           | 0.371363713 | 0.59283522  | 0.149892207  | 0           |
| <i>Rpl38</i>   | 0           | 0.361832237 | 0.436508044 | 0.287156431  | 0           |
| <i>Rpl13</i>   | 6.6997E-284 | 0.357879639 | 0.747193782 | -0.031434503 | 4.7003E-282 |
| <i>Atp5g1</i>  | 3.9631E-125 | 0.349048964 | 0.708190598 | -0.010092671 | 1.1818E-123 |
| <i>Rps14</i>   | 0           | 0.335654381 | 0.482307251 | 0.189001511  | 0           |
| <i>Cox4i1</i>  | 5.6112E-147 | 0.322786866 | 0.79596884  | -0.150395108 | 1.9552E-145 |
| <i>Ndufb11</i> | 2.1116E-282 | 0.318630774 | 0.66818369  | -0.030922141 | 1.4683E-280 |
| <i>Actb</i>    | 3.73963E-13 | 0.315987953 | 0.709783755 | -0.077807848 | 1.88966E-12 |
| <i>Rps7</i>    | 3.2648E-270 | 0.299927628 | 0.640739734 | -0.040884478 | 2.1289E-268 |
| <i>Rpl37</i>   | 8.5236E-186 | 0.297998831 | 0.449250878 | 0.146746783  | 3.8491E-184 |
| <i>Rps27l</i>  | 6.3876E-280 | 0.296047802 | 0.49406073  | 0.098034875  | 4.3644E-278 |
| <i>Rpl11</i>   | 6.3355E-223 | 0.293434883 | 0.52143567  | 0.065434096  | 3.445E-221  |
| <i>Kcnk16</i>  | 3.186E-104  | 0.292679514 | 0.388125573 | 0.197233456  | 7.9982E-103 |
| <i>Gpx3</i>    | 0           | 0.292115048 | 0.35094024  | 0.233289856  | 0           |
| <i>Hint1</i>   | 0           | 0.288516684 | 0.550616553 | 0.026416815  | 0           |
| <i>Tmsb10</i>  | 0           | 0.287039134 | 0.338746017 | 0.235332251  | 0           |
| <i>Rpl27</i>   | 6.7931E-278 | 0.276218258 | 0.502068984 | 0.050367532  | 4.6214E-276 |
| <i>Fau</i>     | 2.49048E-32 | 0.273610324 | 0.567693066 | -0.020472418 | 2.43243E-31 |
| <i>Ssr2</i>    | 0           | 0.267851652 | 0.474017807 | 0.061685497  | 0           |
| <i>Rps4x</i>   | 3.4263E-186 | 0.255509704 | 0.32918772  | 0.181831689  | 1.5517E-184 |
| <i>Rps5</i>    | 3.4663E-267 | 0.254585492 | 0.770601397 | -0.261430413 | 2.2144E-265 |
| <i>Rps13</i>   | 6.3314E-196 | 0.248313179 | 0.352745969 | 0.14388039   | 3.0335E-194 |
| <i>Atp5e</i>   | 1.89E-120   | 0.234943726 | 0.488643309 | -0.018755858 | 5.4003E-119 |
| <i>Spint2</i>  | 0           | 0.234570008 | 0.451665545 | 0.017474471  | 0           |
| <i>Rpl35</i>   | 2.2037E-157 | 0.227096199 | 0.417265508 | 0.036926889  | 8.3047E-156 |

|               |             |              |              |              |             |
|---------------|-------------|--------------|--------------|--------------|-------------|
| <i>Tspan7</i> | 0           | 0.221332833  | 0.296781829  | 0.145883836  | 0           |
| <i>Rpl10a</i> | 3.2206E-175 | 0.220704976  | 0.620610481  | -0.179200528 | 1.3319E-173 |
| <i>Rpl39</i>  | 0           | 0.21677793   | 0.552143489  | -0.11858763  | 0           |
| <i>Rpl30</i>  | 8.8723E-106 | 0.213280335  | 0.389588701  | 0.036971969  | 2.2525E-104 |
| <i>Swi5</i>   | 0           | 0.21046814   | 0.3609555    | 0.05998078   | 0           |
| <i>Cox5b</i>  | 1.2838E-142 | 0.201646834  | 0.374100829  | 0.029192839  | 4.3016E-141 |
| <i>Rpl36</i>  | 7.40584E-13 | -0.263348744 | 0.085803724  | -0.612501212 | 3.67023E-12 |
| <i>Ptma</i>   | 2.1481E-145 | -0.618433156 | -0.252297623 | -0.984568689 | 7.3869E-144 |
