# Supplementary material
Source: publisher figshare collection journal article supplement (https://diabetesjournals.figshare.com/articles/dataset/_/20080700)
Supplement: Supplementary file 2 [file 1]

**Supplemental Table 5. GO-terms enriched in differentially expressed genes when comparing  $\beta$ -cell clusters *Beta1* versus *Beta2*, *Beta3*, or *Beta4*, and biological processes enriched in highly expressed genes of OB -CH or NZO -CH *Beta1* cells. Validated by Fisher's exact test (p-value). Related to Figure 2.**

| Category         | Term                                                                                                                       | Count | Percentage  | p-value     | Genes                                                                                                                                 | List.Total | Pop.Hits | Pop.Total | Fold.Enrichment | Bonferroni  | Benjamini   | FDR         | Comparison                                            |
|------------------|----------------------------------------------------------------------------------------------------------------------------|-------|-------------|-------------|---------------------------------------------------------------------------------------------------------------------------------------|------------|----------|-----------|-----------------|-------------|-------------|-------------|-------------------------------------------------------|
| GOTERM_BP_DIRECT | GO:0006412-translation                                                                                                     | 17    | 28.33333333 | 8.6903E-14  | Rpl9, Rps13, Rps18, Rpl23, Rps3, Rps2, Rpl17, Rpl7, Rpl35a, Rpl10, Rps5, Rpl26, Rpl32, Rpl21, Rpl29, Rpl30, Rps7                      | 59         | 401      | 18082     | 12.99268777     | 3.09472E-11 | 3.09472E-11 | 1.19194E-10 | <i>Beta1</i> -OB vs <i>Beta1</i> -NZO (higher in OB)  |
| GOTERM_BP_DIRECT | GO:0042773-ATP synthesis coupled electron transport                                                                        | 5     | 8.333333333 | 1.42241E-09 | Ndufa7, mt-Nd5, mt-Nd4l, mt-Nd4, mt-Co2                                                                                               | 59         | 6        | 18082     | 255.3954802     | 5.06378E-07 | 2.53189E-07 | 1.95032E-06 | <i>Beta1</i> -OB vs <i>Beta1</i> -NZO (higher in OB)  |
| GOTERM_BP_DIRECT | GO:0002181-cytoplasmic translation                                                                                         | 5     | 8.333333333 | 4.11299E-06 | Rpl7, Rpl35a, Rpl9, Rpl26, Rpl29                                                                                                      | 59         | 34       | 18082     | 45.06979063     | 0.001463158 | 0.000487957 | 0.005639323 | <i>Beta1</i> -OB vs <i>Beta1</i> -NZO (higher in OB)  |
| GOTERM_BP_DIRECT | GO:0055114-oxidation-reduction process                                                                                     | 11    | 18.33333333 | 5.13603E-05 | mt-Nd1, Ndufa7, mt-Nd5, Ero1lb, mt-Nd3, mt-Co1, mt-Nd2, mt-Cytb, mt-Nd4l, mt-Nd4, mt-Co2                                              | 59         | 676      | 18082     | 4.987012336     | 0.018118585 | 0.004560752 | 0.070398903 | <i>Beta1</i> -OB vs <i>Beta1</i> -NZO (higher in OB)  |
| GOTERM_BP_DIRECT | GO:0006810-transport                                                                                                       | 17    | 28.33333333 | 0.000138603 | Oaz1, Fxyd6, Naca, Slc2a2, mt-Nd3, mt-Co1, mt-Nd2, mt-Cytb, mt-Nd4l, mt-Nd4, mt-Co2, mt-Nd1, mt-Atp6, Ndufa7, mt-Nd5, Slc30a8, Ero1lb | 59         | 1822     | 18082     | 2.85953227      | 0.04814834  | 0.009820674 | 0.189876007 | <i>Beta1</i> -OB vs <i>Beta1</i> -NZO (higher in OB)  |
| GOTERM_BP_DIRECT | GO:0032024-positive regulation of insulin secretion                                                                        | 4     | 6.666666667 | 0.000551533 | Glpr1, Slc30a8, Isl1, Ucn3                                                                                                            | 59         | 50       | 18082     | 24.5179661      | 0.178316471 | 0.032203389 | 0.753581031 | <i>Beta1</i> -OB vs <i>Beta1</i> -NZO (higher in OB)  |
| GOTERM_BP_DIRECT | GO:0006120-mitochondrial electron transport, NADH to ubiquinone                                                            | 3     | 5           | 0.000653747 | Ndufa7, mt-Nd2, mt-Nd4                                                                                                                | 59         | 12       | 18082     | 76.61864407     | 0.207695918 | 0.032711588 | 0.892660127 | <i>Beta1</i> -OB vs <i>Beta1</i> -NZO (higher in OB)  |
| GOTERM_BP_DIRECT | GO:0006882-cellular zinc ion homeostasis                                                                                   | 3     | 5           | 0.001496875 | Slc30a8, Mt2, Mt1                                                                                                                     | 59         | 18       | 18082     | 51.07909605     | 0.413326533 | 0.064487584 | 2.033005429 | <i>Beta1</i> -OB vs <i>Beta1</i> -NZO (higher in OB)  |
| GOTERM_BP_DIRECT | GO:0009749-response to glucose                                                                                             | 4     | 6.666666667 | 0.002008971 | Txnip, Glpr1, Slc30a8, Ucn3                                                                                                           | 59         | 78       | 18082     | 15.71664494     | 0.511254317 | 0.076464361 | 2.719672595 | <i>Beta1</i> -OB vs <i>Beta1</i> -NZO (higher in OB)  |
| GOTERM_BP_DIRECT | GO:0042273-ribosomal large subunit biogenesis                                                                              | 3     | 5           | 0.002667098 | Rpl7, Rpl35a, Rpl26                                                                                                                   | 59         | 24       | 18082     | 38.30932203     | 0.613550932 | 0.090695739 | 3.595601096 | <i>Beta1</i> -OB vs <i>Beta1</i> -NZO (higher in OB)  |
| GOTERM_BP_DIRECT | GO:0006364-rRNA processing                                                                                                 | 4     | 6.666666667 | 0.007712453 | Rpl7, Rpl35a, Rpl26, Rps7                                                                                                             | 59         | 126      | 18082     | 9.729351628     | 0.936472077 | 0.221643413 | 10.07174587 | <i>Beta1</i> -OB vs <i>Beta1</i> -NZO (higher in OB)  |
| GOTERM_BP_DIRECT | GO:0006979-response to oxidative stress                                                                                    | 4     | 6.666666667 | 0.008940125 | Txnip, mt-Nd3, mt-Co1, Rps3                                                                                                           | 59         | 133      | 18082     | 9.217280489     | 0.959115196 | 0.233879953 | 11.58533979 | <i>Beta1</i> -OB vs <i>Beta1</i> -NZO (higher in OB)  |
| GOTERM_BP_DIRECT | GO:0010273-detoxification of copper ion                                                                                    | 2     | 3.333333333 | 0.012769893 | Mt2, Mt1                                                                                                                              | 59         | 4        | 18082     | 153.2372881     | 0.989697388 | 0.296685135 | 16.15664827 | <i>Beta1</i> -OB vs <i>Beta1</i> -NZO (higher in OB)  |
| GOTERM_BP_DIRECT | GO:0042985-negative regulation of amyloid precursor protein biosynthetic process                                           | 2     | 3.333333333 | 0.019094605 | Itm2b, Bace2                                                                                                                          | 59         | 6        | 18082     | 102.1581921     | 0.998954664 | 0.38752311  | 23.22910801 | <i>Beta1</i> -OB vs <i>Beta1</i> -NZO (higher in OB)  |
| GOTERM_BP_DIRECT | GO:0007218-neuropeptide signaling pathway                                                                                  | 3     | 5           | 0.024761966 | Glpr1, Ucn3, Pyy                                                                                                                      | 59         | 76       | 18082     | 12.09768064     | 0.999867143 | 0.448482923 | 29.09251491 | <i>Beta1</i> -OB vs <i>Beta1</i> -NZO (higher in OB)  |
| GOTERM_BP_DIRECT | GO:0002485-antigen processing and presentation of endogenous peptide antigen via MHC class I via ER pathway, TAP-dependent | 2     | 3.333333333 | 0.028507078 | H2-D1, H2-K1                                                                                                                          | 59         | 9        | 18082     | 68.10546139     | 0.999966231 | 0.474549254 | 32.73632889 | <i>Beta1</i> -OB vs <i>Beta1</i> -NZO (higher in OB)  |
| GOTERM_BP_DIRECT | GO:0010038-response to metal ion                                                                                           | 2     | 3.333333333 | 0.037830774 | Mt2, Mt1                                                                                                                              | 59         | 12       | 18082     | 51.07909605     | 0.99999891  | 0.554070791 | 41.06748168 | <i>Beta1</i> -OB vs <i>Beta1</i> -NZO (higher in OB)  |
| GOTERM_BP_DIRECT | GO:0071294-cellular response to zinc ion                                                                                   | 2     | 3.333333333 | 0.037830774 | Mt2, Mt1                                                                                                                              | 59         | 12       | 18082     | 51.07909605     | 0.99999891  | 0.554070791 | 41.06748168 | <i>Beta1</i> -OB vs <i>Beta1</i> -NZO (higher in OB)  |
| GOTERM_BP_DIRECT | GO:0045926-negative regulation of growth                                                                                   | 2     | 3.333333333 | 0.037830774 | Mt2, Mt1                                                                                                                              | 59         | 12       | 18082     | 51.07909605     | 0.99999891  | 0.554070791 | 41.06748168 | <i>Beta1</i> -OB vs <i>Beta1</i> -NZO (higher in OB)  |
| GOTERM_BP_DIRECT | GO:0007263-nitric oxide mediated signal transduction                                                                       | 2     | 3.333333333 | 0.047066516 | Mt2, Mt1                                                                                                                              | 59         | 15       | 18082     | 40.86327684     | 0.999999965 | 0.614606391 | 48.36788879 | <i>Beta1</i> -OB vs <i>Beta1</i> -NZO (higher in OB)  |
| GOTERM_BP_DIRECT | GO:0046688-response to copper ion                                                                                          | 2     | 3.333333333 | 0.056215119 | mt-Co1, mt-Cytb                                                                                                                       | 59         | 18       | 18082     | 34.0527307      | 0.999999999 | 0.661779705 | 54.76493548 | <i>Beta1</i> -OB vs <i>Beta1</i> -NZO (higher in OB)  |
| GOTERM_BP_DIRECT | GO:0055093-response to hyperoxia                                                                                           | 2     | 3.333333333 | 0.056215119 | mt-Atp6, mt-Cytb                                                                                                                      | 59         | 18       | 18082     | 34.0527307      | 0.999999999 | 0.661779705 | 54.76493548 | <i>Beta1</i> -OB vs <i>Beta1</i> -NZO (higher in OB)  |
| GOTERM_BP_DIRECT | GO:0001916-positive regulation of T cell mediated cytotoxicity                                                             | 2     | 3.333333333 | 0.059245429 | H2-D1, H2-K1                                                                                                                          | 59         | 19       | 18082     | 32.26048171     | 1           | 0.662806807 | 56.71625123 | <i>Beta1</i> -OB vs <i>Beta1</i> -NZO (higher in OB)  |
| GOTERM_BP_DIRECT | GO:0022904-respiratory electron transport chain                                                                            | 2     | 3.333333333 | 0.059245429 | mt-Co3, mt-Cytb                                                                                                                       | 59         | 19       | 18082     | 32.26048171     | 1           | 0.662806807 | 56.71625123 | <i>Beta1</i> -OB vs <i>Beta1</i> -NZO (higher in OB)  |
| GOTERM_BP_DIRECT | GO:0031116-positive regulation of microtubule polymerization                                                               | 2     | 3.333333333 | 0.059245429 | Rgs2, Rps3                                                                                                                            | 59         | 19       | 18082     | 32.26048171     | 1           | 0.662806807 | 56.71625123 | <i>Beta1</i> -OB vs <i>Beta1</i> -NZO (higher in OB)  |
| GOTERM_BP_DIRECT | GO:0000028-ribosomal small subunit assembly                                                                                | 2     | 3.333333333 | 0.065277392 | Rps5, Rps2                                                                                                                            | 59         | 21       | 18082     | 29.18805488     | 1           | 0.681578224 | 60.37028138 | <i>Beta1</i> -OB vs <i>Beta1</i> -NZO (higher in OB)  |
| GOTERM_BP_DIRECT | GO:0042593-glucose homeostasis                                                                                             | 3     | 5           | 0.067974034 | Slc30a8, G6pc2, Ero1lb                                                                                                                | 59         | 133      | 18082     | 6.912960367     | 1           | 0.67989707  | 61.90948171 | <i>Beta1</i> -OB vs <i>Beta1</i> -NZO (higher in OB)  |
| GOTERM_BP_DIRECT | GO:0071385-cellular response to glucocorticoid stimulus                                                                    | 2     | 3.333333333 | 0.068279103 | Isl1, mt-Nd3                                                                                                                          | 59         | 22       | 18082     | 27.86132512     | 1           | 0.665344354 | 62.08007618 | <i>Beta1</i> -OB vs <i>Beta1</i> -NZO (higher in OB)  |
| GOTERM_BP_DIRECT | GO:0097421-liver regeneration                                                                                              | 2     | 3.333333333 | 0.089027455 | Rpl32, Rpl30                                                                                                                          | 59         | 29       | 18082     | 21.13617767     | 1           | 0.749199474 | 72.15398978 | <i>Beta1</i> -OB vs <i>Beta1</i> -NZO (higher in OB)  |
| GOTERM_BP_DIRECT | GO:0046686-response to cadmium ion                                                                                         | 2     | 3.333333333 | 0.089027455 | mt-Cytb, Mt1                                                                                                                          | 59         | 29       | 18082     | 21.13617767     | 1           | 0.749199474 | 72.15398978 | <i>Beta1</i> -OB vs <i>Beta1</i> -NZO (higher in OB)  |
| GOTERM_BP_DIRECT | GO:0002479-antigen processing and presentation of exogenous peptide antigen via MHC class I, TAP-dependent                 | 2     | 3.333333333 | 0.091954194 | H2-D1, H2-K1                                                                                                                          | 59         | 30       | 18082     | 20.43163842     | 1           | 0.746805387 | 73.35590679 | <i>Beta1</i> -OB vs <i>Beta1</i> -NZO (higher in OB)  |
| GOTERM_BP_DIRECT | GO:0043524-negative regulation of neuron apoptotic process                                                                 | 3     | 5           | 0.093324049 | Glpr1, Isl1, Mt1                                                                                                                      | 59         | 160      | 18082     | 5.746398305     | 1           | 0.738530515 | 73.90177611 | <i>Beta1</i> -OB vs <i>Beta1</i> -NZO (higher in OB)  |
| GOTERM_BP_DIRECT | GO:0006412-translation                                                                                                     | 16    | 23.1884058  | 1.13978E-11 | Rpl38, Rpl4, Rps29, Rpl6, Rps17, Rpl35, Rpsa, Rps15a, Rpl31, Rps27, Rps28, Rrbp1, Rpl24, Rps19, Rpl8, Rps23                           | 67         | 401      | 18082     | 10.76830312     | 4.5819E-09  | 4.5819E-09  | 1.59092E-08 | <i>Beta1</i> -NZO vs <i>Beta1</i> -OB (higher in NZO) |

|                  |                                                                              |    |             |             |                                                                                                                |    |      |       |             |             |             |             |                                                       |
|------------------|------------------------------------------------------------------------------|----|-------------|-------------|----------------------------------------------------------------------------------------------------------------|----|------|-------|-------------|-------------|-------------|-------------|-------------------------------------------------------|
| GOTERM_BP_DIRECT | GO:0006457~protein folding                                                   | 8  | 11.5942029  | 4.1577E-07  | Canx, Hsp90aa1, Calr, Fkbp2, P4hb, Hsp90ab1, Fkbp11, Dnaja1                                                    | 67 | 128  | 18082 | 16.86753731 | 0.000167126 | 8.35663E-05 | 0.000580338 | <i>Beta1</i> -NZO vs <i>Beta1</i> -OB (higher in NZO) |
| GOTERM_BP_DIRECT | GO:0000028~ribosomal small subunit assembly                                  | 5  | 7.246376812 | 9.24543E-07 | Rps28, Rps27, Rps19, Rps17, Rpsa                                                                               | 67 | 21   | 18082 | 64.257285   | 0.000371597 | 0.000123881 | 0.001290486 | <i>Beta1</i> -NZO vs <i>Beta1</i> -OB (higher in NZO) |
| GOTERM_BP_DIRECT | GO:0030433~ER-associated ubiquitin-dependent protein catabolic process       | 6  | 8.695652174 | 2.00795E-06 | Vcp, Ubxn4, Edem2, Selenos, Dnajb9, Sec61b                                                                     | 67 | 57   | 18082 | 28.4084839  | 0.00080687  | 0.000201778 | 0.002802692 | <i>Beta1</i> -NZO vs <i>Beta1</i> -OB (higher in NZO) |
| GOTERM_BP_DIRECT | GO:0061077~chaperone-mediated protein folding                                | 4  | 5.797101449 | 0.000213576 | Canx, Calr, Fkbp2, Fkbp11                                                                                      | 67 | 32   | 18082 | 33.73507463 | 0.082283596 | 0.017026751 | 0.297701595 | <i>Beta1</i> -NZO vs <i>Beta1</i> -OB (higher in NZO) |
| GOTERM_BP_DIRECT | GO:0002181~cytoplasmic translation                                           | 4  | 5.797101449 | 0.00025633  | Rplp1, Rpl131, Rpl6, Rpl8                                                                                      | 67 | 34   | 18082 | 31.75065847 | 0.097925118 | 0.017029619 | 0.357196051 | <i>Beta1</i> -NZO vs <i>Beta1</i> -OB (higher in NZO) |
| GOTERM_BP_DIRECT | GO:0030970~retrograde protein transport, ER to cytosol                       | 3  | 4.347826087 | 0.00152345  | Vcp, Selenos, Sec61b                                                                                           | 67 | 16   | 18082 | 50.60261194 | 0.458219197 | 0.083832668 | 2.10559653  | <i>Beta1</i> -NZO vs <i>Beta1</i> -OB (higher in NZO) |
| GOTERM_BP_DIRECT | GO:0042274~ribosomal small subunit biogenesis                                | 3  | 4.347826087 | 0.002155641 | Rps28, Rps19, Rps17                                                                                            | 67 | 19   | 18082 | 42.61272584 | 0.580001118 | 0.102765392 | 2.967218803 | <i>Beta1</i> -NZO vs <i>Beta1</i> -OB (higher in NZO) |
| GOTERM_BP_DIRECT | GO:0015986~ATP synthesis coupled proton transport                            | 3  | 4.347826087 | 0.003159483 | Atp5l, Atp5e, Atp5g1                                                                                           | 67 | 23   | 18082 | 35.201817   | 0.71976391  | 0.131811988 | 4.320914581 | <i>Beta1</i> -NZO vs <i>Beta1</i> -OB (higher in NZO) |
| GOTERM_BP_DIRECT | GO:0006810~transport                                                         | 15 | 21.73913043 | 0.005391391 | Ndufs2, Ndufb11, Atp5l, Atp5e, Atp5g1, Sec61b, Lman1, Vcp, Uqcrcq, Rrbp1, Sec61a1, Kdelr2, Hdldb, Ndufv3, Scg5 | 67 | 1822 | 18082 | 2.221849042 | 0.886187491 | 0.195327796 | 7.268096664 | <i>Beta1</i> -NZO vs <i>Beta1</i> -OB (higher in NZO) |
| GOTERM_BP_DIRECT | GO:0045787~positive regulation of cell cycle                                 | 3  | 4.347826087 | 0.009360018 | Rps15a, BC004004, Calr                                                                                         | 67 | 40   | 18082 | 20.24104478 | 0.977187517 | 0.290842077 | 12.30138811 | <i>Beta1</i> -NZO vs <i>Beta1</i> -OB (higher in NZO) |
| GOTERM_BP_DIRECT | GO:0046034~ATP metabolic process                                             | 3  | 4.347826087 | 0.009360018 | Vcp, Atp5l, Atp5g1                                                                                             | 67 | 40   | 18082 | 20.24104478 | 0.977187517 | 0.290842077 | 12.30138811 | <i>Beta1</i> -NZO vs <i>Beta1</i> -OB (higher in NZO) |
| GOTERM_BP_DIRECT | GO:0043066~negative regulation of apoptotic process                          | 7  | 10.14492754 | 0.017041342 | Ccnd2, Atf5, Gcg, Hsp90ab1, Hyou1, Dnaja1, Hspa5                                                               | 67 | 566  | 18082 | 3.337745899 | 0.999001906 | 0.43774807  | 21.33062645 | <i>Beta1</i> -NZO vs <i>Beta1</i> -OB (higher in NZO) |
| GOTERM_BP_DIRECT | GO:0015992~proton transport                                                  | 3  | 4.347826087 | 0.019019875 | Atp5l, Atp5e, Atp5g1                                                                                           | 67 | 58   | 18082 | 13.95934122 | 0.999555979 | 0.447785273 | 23.51228813 | <i>Beta1</i> -NZO vs <i>Beta1</i> -OB (higher in NZO) |
| GOTERM_BP_DIRECT | GO:0006898~receptor-mediated endocytosis                                     | 3  | 4.347826087 | 0.020271506 | Ftl1, Calr, Hyou1                                                                                              | 67 | 60   | 18082 | 13.49402985 | 0.999734229 | 0.444597735 | 24.86327135 | <i>Beta1</i> -NZO vs <i>Beta1</i> -OB (higher in NZO) |
| GOTERM_BP_DIRECT | GO:0034976~response to endoplasmic reticulum stress                          | 3  | 4.347826087 | 0.031449993 | P4hb, Hyou1, Hspa5                                                                                             | 67 | 76   | 18082 | 10.65318146 | 0.999997363 | 0.575311103 | 35.9839274  | <i>Beta1</i> -NZO vs <i>Beta1</i> -OB (higher in NZO) |
| GOTERM_BP_DIRECT | GO:0006888~ER to Golgi vesicle-mediated transport                            | 3  | 4.347826087 | 0.032985178 | Lman1, Vcp, Hyou1                                                                                              | 67 | 78   | 18082 | 10.38002296 | 0.999998606 | 0.56946604  | 37.38577853 | <i>Beta1</i> -NZO vs <i>Beta1</i> -OB (higher in NZO) |
| GOTERM_BP_DIRECT | GO:0006983~ER overload response                                              | 2  | 2.898550725 | 0.035915453 | Selenos, Hspa5                                                                                                 | 67 | 10   | 18082 | 53.9761194  | 0.999999589 | 0.578915408 | 39.98276637 | <i>Beta1</i> -NZO vs <i>Beta1</i> -OB (higher in NZO) |
| GOTERM_BP_DIRECT | GO:0060736~prostate gland growth                                             | 2  | 2.898550725 | 0.035915453 | Psap, Prlr                                                                                                     | 67 | 10   | 18082 | 53.9761194  | 0.999999589 | 0.578915408 | 39.98276637 | <i>Beta1</i> -NZO vs <i>Beta1</i> -OB (higher in NZO) |
| GOTERM_BP_DIRECT | GO:0005975~carbohydrate metabolic process                                    | 4  | 5.797101449 | 0.039501682 | Gfpt1, Ppp1r1a, Mlec, Gapdh                                                                                    | 67 | 206  | 18082 | 5.240399942 | 0.999999908 | 0.593471567 | 43.0249819  | <i>Beta1</i> -NZO vs <i>Beta1</i> -OB (higher in NZO) |
| GOTERM_BP_DIRECT | GO:0009651~response to salt stress                                           | 2  | 2.898550725 | 0.049923218 | Hsp90aa1, Hsp90ab1                                                                                             | 67 | 14   | 18082 | 38.554371   | 0.999999999 | 0.661607275 | 51.0726216  | <i>Beta1</i> -NZO vs <i>Beta1</i> -OB (higher in NZO) |
| GOTERM_BP_DIRECT | GO:0033160~positive regulation of protein import into nucleus, translocation | 2  | 2.898550725 | 0.049923218 | Hsp90aa1, Hsp90ab1                                                                                             | 67 | 14   | 18082 | 38.554371   | 0.999999999 | 0.661607275 | 51.0726216  | <i>Beta1</i> -NZO vs <i>Beta1</i> -OB (higher in NZO) |
| GOTERM_BP_DIRECT | GO:0031396~regulation of protein ubiquitination                              | 2  | 2.898550725 | 0.056851741 | Hsp90aa1, Hsp90ab1                                                                                             | 67 | 16   | 18082 | 33.73507463 | 1           | 0.691640488 | 55.82439021 | <i>Beta1</i> -NZO vs <i>Beta1</i> -OB (higher in NZO) |
| GOTERM_BP_DIRECT | GO:0045793~positive regulation of cell size                                  | 2  | 2.898550725 | 0.056851741 | Hsp90aa1, Hsp90ab1                                                                                             | 67 | 16   | 18082 | 33.73507463 | 1           | 0.691640488 | 55.82439021 | <i>Beta1</i> -NZO vs <i>Beta1</i> -OB (higher in NZO) |
| GOTERM_BP_DIRECT | GO:0021680~cerebellar Purkinje cell layer development                        | 2  | 2.898550725 | 0.056851741 | Uqcrcq, Hspa5                                                                                                  | 67 | 16   | 18082 | 33.73507463 | 1           | 0.691640488 | 55.82439021 | <i>Beta1</i> -NZO vs <i>Beta1</i> -OB (higher in NZO) |
| GOTERM_BP_DIRECT | GO:0030490~maturation of SSU-rRNA                                            | 2  | 2.898550725 | 0.056851741 | Rps28, Rps19                                                                                                   | 67 | 16   | 18082 | 33.73507463 | 1           | 0.691640488 | 55.82439021 | <i>Beta1</i> -NZO vs <i>Beta1</i> -OB (higher in NZO) |
| GOTERM_BP_DIRECT | GO:0006364~rRNA processing                                                   | 3  | 4.347826087 | 0.077456188 | Rps28, Rps19, Rps17                                                                                            | 67 | 126  | 18082 | 6.4257285   | 1           | 0.786326265 | 67.54495905 | <i>Beta1</i> -NZO vs <i>Beta1</i> -OB (higher in NZO) |
| GOTERM_BP_DIRECT | GO:0006754~ATP biosynthetic process                                          | 2  | 2.898550725 | 0.080711959 | Atp5l, Atp5e                                                                                                   | 67 | 23   | 18082 | 23.467878   | 1           | 0.785137192 | 69.10765213 | <i>Beta1</i> -NZO vs <i>Beta1</i> -OB (higher in NZO) |
| GOTERM_BP_DIRECT | GO:0000027~ribosomal large subunit assembly                                  | 2  | 2.898550725 | 0.090754853 | Rpl6, Rpl24                                                                                                    | 67 | 26   | 18082 | 20.76004592 | 1           | 0.810409926 | 73.49903126 | <i>Beta1</i> -NZO vs <i>Beta1</i> -OB (higher in NZO) |
| GOTERM_BP_DIRECT | GO:0007029~endoplasmic reticulum organization                                | 2  | 2.898550725 | 0.094078412 | Lman1, Sec61a1                                                                                                 | 67 | 27   | 18082 | 19.99115533 | 1           | 0.808896913 | 74.81958417 | <i>Beta1</i> -NZO vs <i>Beta1</i> -OB (higher in NZO) |
| GOTERM_BP_DIRECT | GO:0071353~cellular response to interleukin-4                                | 2  | 2.898550725 | 0.094078412 | Hsp90ab1, Hspa5                                                                                                | 67 | 27   | 18082 | 19.99115533 | 1           | 0.808896913 | 74.81958417 | <i>Beta1</i> -NZO vs <i>Beta1</i> -OB (higher in NZO) |
