# Supplementary material
Source: publisher figshare collection journal article supplement (https://diabetesjournals.figshare.com/articles/dataset/_/20080700)
Supplement: Supplementary file 3 [file 1]

**Supplemental Table 9. List of genes differentially expressed between mouse  $\beta$ -cells harbouring genetic variants associated with T2D in humans.** Human and mouse variants are listed with their respective classification. For mouse missense variants, SIFT and PROVEAN predictions are shown. *Related to Figure 7.*

| CHR | Position  | RS_number                | Ref           | Alt        | gene_name      | variation                          | Species      | SIFT Score | SIFT Prediction | PROVEAN Score | PROVEAN Prediction |
|-----|-----------|--------------------------|---------------|------------|----------------|------------------------------------|--------------|------------|-----------------|---------------|--------------------|
| 1   | 74890407  | .                        | A             | C          | <i>Cryba2</i>  | Reg variation                      | mus_musculus |            |                 |               |                    |
| 1   | 74890409  | .                        | T             | C          | <i>Cryba2</i>  | Reg variation                      | mus_musculus |            |                 |               |                    |
| 1   | 97935498  | .                        | GGA           | G          | <i>Pam</i>     | Reg variation                      | mus_musculus |            |                 |               |                    |
| 1   | 98042951  | .                        | AC            | A          | <i>Pam</i>     | Reg variation                      | mus_musculus |            |                 |               |                    |
| 1   | 98047308  | rs232149633; rs261419874 | T             | TA         | <i>Pam</i>     | Reg variation                      | mus_musculus |            |                 |               |                    |
| 1   | 98059747  | rs242060522              | T             | TTTCTC     | <i>Pam</i>     | Reg variation                      | mus_musculus |            |                 |               |                    |
| 1   | 97835326  | .                        | A             | C          | <i>Pam</i>     | Reg variation                      | mus_musculus |            |                 |               |                    |
| 1   | 97836685  | .                        | C             | T          | <i>Pam</i>     | Reg variation                      | mus_musculus |            |                 |               |                    |
| 1   | 97951767  | rs212003494              | C             | G          | <i>Pam</i>     | Reg variation                      | mus_musculus |            |                 |               |                    |
| 1   | 98096338  | rs251903973              | A             | C          | <i>Pam</i>     | Reg variation                      | mus_musculus |            |                 |               |                    |
| 1   | 120031656 | rs45739681               | T             | C          | <i>Sctr</i>    | missense_variant                   | mus_musculus | -1.1       | Neutral         | 0.581         | Tolerated          |
| 1   | 120063246 | rs31178208               | G             | T          | <i>Sctr</i>    | missense_variant                   | mus_musculus | -0.69      | Neutral         | 0.604         | Tolerated          |
| 1   | 120063257 | rs31842162               | G             | A          | <i>Sctr</i>    | missense_variant                   | mus_musculus | -0.94      | Neutral         | 0.398         | Tolerated          |
| 1   | 120063246 | rs31178208               | G             | T          | <i>Sctr</i>    | Reg variation                      | mus_musculus |            |                 |               |                    |
| 1   | 120063257 | rs31842162               | G             | A          | <i>Sctr</i>    | Reg variation                      | mus_musculus |            |                 |               |                    |
| 1   | 127679002 | rs213302690; rs241792983 | G             | GACAC      | <i>Tmem163</i> | Reg variation                      | mus_musculus |            |                 |               |                    |
| 1   | 127487851 | .                        | A             | C          | <i>Tmem163</i> | Reg variation                      | mus_musculus |            |                 |               |                    |
| 1   | 127503143 | .                        | G             | A          | <i>Tmem163</i> | Reg variation                      | mus_musculus |            |                 |               |                    |
| 1   | 127503147 | .                        | A             | G          | <i>Tmem163</i> | Reg variation                      | mus_musculus |            |                 |               |                    |
| 1   | 127503153 | rs581064359              | A             | G          | <i>Tmem163</i> | Reg variation                      | mus_musculus |            |                 |               |                    |
| 1   | 127679002 | rs213302690; rs241792983 | G             | GACAC      | <i>Tmem163</i> | UTR variation                      | mus_musculus |            |                 |               |                    |
| 1   | 127487851 | .                        | A             | C          | <i>Tmem163</i> | UTR variation                      | mus_musculus |            |                 |               |                    |
| 1   | 62114219  | rs12140153               | G             | A, T       | <i>PATJ</i>    | missense_variant                   | homo sapiens | --         | --              | --            | --                 |
| 1   | 62114219  | rs12140153               | G             | A, T       | <i>PATJ</i>    | non_coding_transcript_exon_variant | homo sapiens |            |                 |               |                    |
| 1   | 62114219  | rs12140153               | G             | A, T       | <i>PATJ</i>    | NMD_transcript_variant             | homo sapiens |            |                 |               |                    |
| 1   | 62114219  | rs12140153               | G             | A, T       | <i>PATJ</i>    | 3_prime_UTR_variant                | homo sapiens |            |                 |               |                    |
| 1   | 235378708 | rs10737818               | A             | C, G, T    | <i>TBCE</i>    | NMD_transcript_variant             | homo sapiens |            |                 |               |                    |
| 1   | 235378708 | rs10737818               | A             | C, G, T    | <i>TBCE</i>    | intron_variant                     | homo sapiens |            |                 |               |                    |
| 1   | 235378708 | rs10737818               | A             | C, G, T    | <i>TBCE</i>    | non_coding_transcript_variant      | homo sapiens |            |                 |               |                    |
| 1   | 235378708 | rs10737818               | A             | C, G, T    | <i>TBCE</i>    | upstream_gene_variant              | homo sapiens |            |                 |               |                    |
| 2   | 92404512  | .                        | G             | GCACA, GCA | <i>Cry2</i>    | Reg variation                      | mus_musculus |            |                 |               |                    |
| 2   | 92433507  | rs239084903              | TG            | T          | <i>Cry2</i>    | Reg variation                      | mus_musculus |            |                 |               |                    |
| 2   | 92435216  | rs249683397              | C             | CACAT      | <i>Cry2</i>    | Reg variation                      | mus_musculus |            |                 |               |                    |
| 2   | 92435987  | rs217642942; rs260676817 | A             | ACC        | <i>Cry2</i>    | Reg variation                      | mus_musculus |            |                 |               |                    |
| 2   | 92407788  | rs243683074              | G             | A          | <i>Cry2</i>    | Reg variation                      | mus_musculus |            |                 |               |                    |
| 2   | 92407789  | rs265605424              | G             | A          | <i>Cry2</i>    | Reg variation                      | mus_musculus |            |                 |               |                    |
| 2   | 92409378  | rs214932036              | C             | T          | <i>Cry2</i>    | Reg variation                      | mus_musculus |            |                 |               |                    |
| 2   | 92409974  | rs27369160               | A             | C          | <i>Cry2</i>    | Reg variation                      | mus_musculus |            |                 |               |                    |
| 2   | 92424064  | rs48880463               | T             | C          | <i>Cry2</i>    | Reg variation                      | mus_musculus |            |                 |               |                    |
| 2   | 92435872  | rs52131450               | G             | C          | <i>Cry2</i>    | Reg variation                      | mus_musculus |            |                 |               |                    |
| 2   | 92404512  | .                        | G             | GCACA, GCA | <i>Cry2</i>    | UTR variation                      | mus_musculus |            |                 |               |                    |
| 2   | 174285320 | rs28297665               | G             | A          | <i>Gnas</i>    | missense_variant                   | mus_musculus | -3.48      | Deleterious     | 0.122         | Tolerated          |
| 2   | 174288598 | rs255830506; rs233297724 | G             | GT         | <i>Gnas</i>    | Reg variation                      | mus_musculus |            |                 |               |                    |
| 2   | 174289739 | rs244586792              | A             | AAC        | <i>Gnas</i>    | Reg variation                      | mus_musculus |            |                 |               |                    |
| 2   | 174289863 | rs247888475; rs216452856 | C             | CCACACACA  | <i>Gnas</i>    | Reg variation                      | mus_musculus |            |                 |               |                    |
| 2   | 174292150 | rs230708533              | TCC           | T          | <i>Gnas</i>    | Reg variation                      | mus_musculus |            |                 |               |                    |
| 2   | 174293932 | rs253469302              | GTA           | G          | <i>Gnas</i>    | Reg variation                      | mus_musculus |            |                 |               |                    |
| 2   | 174293966 | .                        | ATATATATATATG | A          | <i>Gnas</i>    | Reg variation                      | mus_musculus |            |                 |               |                    |
| 2   | 174294039 | rs266074193              | CAT           | C          | <i>Gnas</i>    | Reg variation                      | mus_musculus |            |                 |               |                    |
| 2   | 174297769 | rs251982817              | A             | AT         | <i>Gnas</i>    | Reg variation                      | mus_musculus |            |                 |               |                    |

|   |           |                          |            |         |      |               |              |  |  |  |  |
|---|-----------|--------------------------|------------|---------|------|---------------|--------------|--|--|--|--|
| 2 | 174301105 | rs211942888              | CAT        | C       | Gnas | Reg variation | mus_musculus |  |  |  |  |
| 2 | 174302560 | rs228827075              | A          | AT      | Gnas | Reg variation | mus_musculus |  |  |  |  |
| 2 | 174302623 | rs259478587              | GTACCATGGC | G       | Gnas | Reg variation | mus_musculus |  |  |  |  |
| 2 | 174303048 | rs264182829              | T          | TA      | Gnas | Reg variation | mus_musculus |  |  |  |  |
| 2 | 174304597 | rs249092734              | C          | CAT     | Gnas | Reg variation | mus_musculus |  |  |  |  |
| 2 | 174304723 | rs239343721              | A          | AACAT   | Gnas | Reg variation | mus_musculus |  |  |  |  |
| 2 | 174304815 | rs218929407              | CACAA      | C       | Gnas | Reg variation | mus_musculus |  |  |  |  |
| 2 | 174305090 | rs215616764              | T          | TAAC    | Gnas | Reg variation | mus_musculus |  |  |  |  |
| 2 | 174305412 | rs254750254              | C          | CTT     | Gnas | Reg variation | mus_musculus |  |  |  |  |
| 2 | 174305547 | rs261937396              | AT         | A       | Gnas | Reg variation | mus_musculus |  |  |  |  |
| 2 | 174324418 | rs252105729; rs261403729 | GA         | G       | Gnas | Reg variation | mus_musculus |  |  |  |  |
| 2 | 174325456 | rs263537109              | A          | AC      | Gnas | Reg variation | mus_musculus |  |  |  |  |
| 2 | 174328296 | rs232361371              | TTTTG      | T       | Gnas | Reg variation | mus_musculus |  |  |  |  |
| 2 | 174329618 | rs252451206              | C          | CCTCTCT | Gnas | Reg variation | mus_musculus |  |  |  |  |
| 2 | 174331704 | rs250960133              | CA         | C       | Gnas | Reg variation | mus_musculus |  |  |  |  |
| 2 | 174333355 | rs215295130; rs252954253 | CTT        | C       | Gnas | Reg variation | mus_musculus |  |  |  |  |
| 2 | 174333464 | rs215180644; rs237103403 | CT         | C       | Gnas | Reg variation | mus_musculus |  |  |  |  |
| 2 | 174338261 | rs265998168; rs226235640 | T          | TG      | Gnas | Reg variation | mus_musculus |  |  |  |  |
| 2 | 174340238 | rs221007778              | TGACCCCA   | T       | Gnas | Reg variation | mus_musculus |  |  |  |  |
| 2 | 174282358 | rs28314177               | C          | T       | Gnas | Reg variation | mus_musculus |  |  |  |  |
| 2 | 174283935 | rs28314169               | G          | G       | Gnas | Reg variation | mus_musculus |  |  |  |  |
| 2 | 174284123 | rs51679344               | A          | C       | Gnas | Reg variation | mus_musculus |  |  |  |  |
| 2 | 174285320 | rs28297665               | G          | A       | Gnas | Reg variation | mus_musculus |  |  |  |  |
| 2 | 174285627 | rs255724117              | G          | A       | Gnas | Reg variation | mus_musculus |  |  |  |  |
| 2 | 174286274 | rs263573680              | T          | A       | Gnas | Reg variation | mus_musculus |  |  |  |  |
| 2 | 174286491 | rs46729682               | A          | G       | Gnas | Reg variation | mus_musculus |  |  |  |  |
| 2 | 174287881 | rs28297657               | A          | G       | Gnas | Reg variation | mus_musculus |  |  |  |  |
| 2 | 174287954 | rs28297656               | A          | G       | Gnas | Reg variation | mus_musculus |  |  |  |  |
| 2 | 174295570 | rs226885941              | G          | T       | Gnas | Reg variation | mus_musculus |  |  |  |  |
| 2 | 174297785 | rs231224738              | T          | A       | Gnas | Reg variation | mus_musculus |  |  |  |  |
| 2 | 174301151 |                          | A          | C       | Gnas | Reg variation | mus_musculus |  |  |  |  |
| 2 | 174302632 |                          | C          | T       | Gnas | Reg variation | mus_musculus |  |  |  |  |
| 2 | 174302822 | rs28297622               | C          | T       | Gnas | Reg variation | mus_musculus |  |  |  |  |
| 2 | 174302977 | rs242468602              | C          | T       | Gnas | Reg variation | mus_musculus |  |  |  |  |
| 2 | 174304420 |                          | C          | T       | Gnas | Reg variation | mus_musculus |  |  |  |  |
| 2 | 174304422 |                          | G          | A       | Gnas | Reg variation | mus_musculus |  |  |  |  |
| 2 | 174304481 |                          | G          | A       | Gnas | Reg variation | mus_musculus |  |  |  |  |
| 2 | 174304496 |                          | C          | T       | Gnas | Reg variation | mus_musculus |  |  |  |  |
| 2 | 174304498 |                          | C          | A       | Gnas | Reg variation | mus_musculus |  |  |  |  |
| 2 | 174304501 |                          | C          | A       | Gnas | Reg variation | mus_musculus |  |  |  |  |
| 2 | 174304602 |                          | C          | T       | Gnas | Reg variation | mus_musculus |  |  |  |  |
| 2 | 174304660 | rs257454977              | C          | T       | Gnas | Reg variation | mus_musculus |  |  |  |  |
| 2 | 174304664 | rs227613739              | T          | C       | Gnas | Reg variation | mus_musculus |  |  |  |  |
| 2 | 174305608 | rs28297615               | C          | A       | Gnas | Reg variation | mus_musculus |  |  |  |  |
| 2 | 174322749 | rs28297531               | G          | A       | Gnas | Reg variation | mus_musculus |  |  |  |  |
| 2 | 174323769 | rs237642782              | G          | C       | Gnas | Reg variation | mus_musculus |  |  |  |  |
| 2 | 174326418 | rs28297509               | G          | A       | Gnas | Reg variation | mus_musculus |  |  |  |  |
| 2 | 174330554 | rs222099405              | C          | T       | Gnas | Reg variation | mus_musculus |  |  |  |  |
| 2 | 174331293 | rs212509120              | C          | A       | Gnas | Reg variation | mus_musculus |  |  |  |  |
| 2 | 174331379 | rs256514576              | C          | T       | Gnas | Reg variation | mus_musculus |  |  |  |  |
| 2 | 174340551 | rs28297497               | T          | C       | Gnas | Reg variation | mus_musculus |  |  |  |  |
| 2 | 174342095 | rs231553332              | A          | G       | Gnas | Reg variation | mus_musculus |  |  |  |  |
| 2 | 174301105 | rs211942888              | CAT        | C       | Gnas | UTR variation | mus_musculus |  |  |  |  |
| 2 | 174328296 | rs232361371              | TTTTG      | T       | Gnas | UTR variation | mus_musculus |  |  |  |  |

|   |           |             |                   |              |         |                                    |              |    |    |    |    |
|---|-----------|-------------|-------------------|--------------|---------|------------------------------------|--------------|----|----|----|----|
| 2 | 174329618 | rs252451206 | C                 | CCTCTCT      | Gnas    | UTR variation                      | mus_musculus |    |    |    |    |
| 2 | 174301151 | .           | A                 | C            | Gnas    | UTR variation                      | mus_musculus |    |    |    |    |
| 2 | 218994449 | rs113414093 | G                 | A            | CRYBA2  | upstream_gene_variant              | homo sapiens |    |    |    |    |
| 2 | 119473494 | rs3731600   | C                 | G            | SCTR    | missense_variant                   | homo sapiens | -- | -- | -- | -- |
| 2 | 119473494 | rs3731600   | C                 | G            | SCTR    | non_coding_transcript_exon_variant | homo sapiens |    |    |    |    |
| 2 | 134722410 | rs6723108   | G                 | T            | TMEM163 | upstream_gene_variant              | homo sapiens |    |    |    |    |
| 3 | 36470842  | rs257047378 | A                 | AAAT         | Anxa5   | Reg variation                      | mus_musculus |    |    |    |    |
| 3 | 36471475  | rs249522381 | T                 | TG           | Anxa5   | Reg variation                      | mus_musculus |    |    |    |    |
| 3 | 36471527  | rs235802778 | G                 | GAAAGTAAAGGC | Anxa5   | Reg variation                      | mus_musculus |    |    |    |    |
| 3 | 36473878  | rs223237581 | C                 | CAAAAA       | Anxa5   | Reg variation                      | mus_musculus |    |    |    |    |
| 3 | 36474120  | rs253084634 | G                 | GGGAGGGAA    | Anxa5   | Reg variation                      | mus_musculus |    |    |    |    |
| 3 | 36474338  | rs240231244 | AGTGTGTGT         | AGT, A       | Anxa5   | Reg variation                      | mus_musculus |    |    |    |    |
| 3 | 36476394  | .           | CTGAGTCTGGCCCTGAT | C            | Anxa5   | Reg variation                      | mus_musculus |    |    |    |    |
| 3 | 36470877  | rs29935187  | G                 | C            | Anxa5   | Reg variation                      | mus_musculus |    |    |    |    |
| 3 | 36470905  | rs29935190  | A                 | G            | Anxa5   | Reg variation                      | mus_musculus |    |    |    |    |
| 3 | 36470978  | rs29935193  | T                 | C            | Anxa5   | Reg variation                      | mus_musculus |    |    |    |    |
| 3 | 36471018  | rs29936066  | T                 | C            | Anxa5   | Reg variation                      | mus_musculus |    |    |    |    |
| 3 | 36471180  | rs29936069  | T                 | G            | Anxa5   | Reg variation                      | mus_musculus |    |    |    |    |
| 3 | 36471280  | rs29936072  | T                 | C            | Anxa5   | Reg variation                      | mus_musculus |    |    |    |    |
| 3 | 36471340  | rs50658524  | T                 | G            | Anxa5   | Reg variation                      | mus_musculus |    |    |    |    |
| 3 | 36471399  | rs29936865  | T                 | C            | Anxa5   | Reg variation                      | mus_musculus |    |    |    |    |
| 3 | 36471491  | rs29936871  | G                 | A            | Anxa5   | Reg variation                      | mus_musculus |    |    |    |    |
| 3 | 36471595  | rs46079180  | C                 | A            | Anxa5   | Reg variation                      | mus_musculus |    |    |    |    |
| 3 | 36471597  | rs48848095  | G                 | A            | Anxa5   | Reg variation                      | mus_musculus |    |    |    |    |
| 3 | 36471615  | rs51922835  | T                 | C            | Anxa5   | Reg variation                      | mus_musculus |    |    |    |    |
| 3 | 36471646  | rs46806669  | T                 | C            | Anxa5   | Reg variation                      | mus_musculus |    |    |    |    |
| 3 | 36471648  | rs48913751  | A                 | G            | Anxa5   | Reg variation                      | mus_musculus |    |    |    |    |
| 3 | 36471685  | rs108078357 | A                 | C            | Anxa5   | Reg variation                      | mus_musculus |    |    |    |    |
| 3 | 36471688  | rs108169847 | C                 | A            | Anxa5   | Reg variation                      | mus_musculus |    |    |    |    |
| 3 | 36471741  | rs29937754  | A                 | G            | Anxa5   | Reg variation                      | mus_musculus |    |    |    |    |
| 3 | 36471853  | rs29937760  | A                 | G            | Anxa5   | Reg variation                      | mus_musculus |    |    |    |    |
| 3 | 36471929  | rs29938616  | G                 | A            | Anxa5   | Reg variation                      | mus_musculus |    |    |    |    |
| 3 | 36471943  | rs29938619  | C                 | T            | Anxa5   | Reg variation                      | mus_musculus |    |    |    |    |
| 3 | 36471971  | rs50652552  | G                 | T            | Anxa5   | Reg variation                      | mus_musculus |    |    |    |    |
| 3 | 36471996  | rs45647545  | G                 | A            | Anxa5   | Reg variation                      | mus_musculus |    |    |    |    |
| 3 | 36472015  | rs49936105  | G                 | A            | Anxa5   | Reg variation                      | mus_musculus |    |    |    |    |
| 3 | 36472105  | rs29938622  | G                 | A            | Anxa5   | Reg variation                      | mus_musculus |    |    |    |    |
| 3 | 36472181  | rs29939548  | C                 | T            | Anxa5   | Reg variation                      | mus_musculus |    |    |    |    |
| 3 | 36472198  | rs51931070  | T                 | C            | Anxa5   | Reg variation                      | mus_musculus |    |    |    |    |
| 3 | 36472301  | rs29940444  | G                 | C            | Anxa5   | Reg variation                      | mus_musculus |    |    |    |    |
| 3 | 36472377  | rs48078657  | A                 | G            | Anxa5   | Reg variation                      | mus_musculus |    |    |    |    |
| 3 | 36472398  | rs51652959  | G                 | A            | Anxa5   | Reg variation                      | mus_musculus |    |    |    |    |
| 3 | 36472472  | rs236548897 | C                 | G            | Anxa5   | Reg variation                      | mus_musculus |    |    |    |    |
| 3 | 36472487  | rs52118728  | T                 | C            | Anxa5   | Reg variation                      | mus_musculus |    |    |    |    |
| 3 | 36472666  | rs218542078 | T                 | C            | Anxa5   | Reg variation                      | mus_musculus |    |    |    |    |
| 3 | 36472736  | rs236802428 | A                 | G            | Anxa5   | Reg variation                      | mus_musculus |    |    |    |    |
| 3 | 36472811  | rs46298039  | T                 | G            | Anxa5   | Reg variation                      | mus_musculus |    |    |    |    |
| 3 | 36472879  | rs51007008  | T                 | G            | Anxa5   | Reg variation                      | mus_musculus |    |    |    |    |
| 3 | 36473104  | rs49655901  | C                 | T            | Anxa5   | Reg variation                      | mus_musculus |    |    |    |    |
| 3 | 36473105  | rs45757242  | C                 | A            | Anxa5   | Reg variation                      | mus_musculus |    |    |    |    |
| 3 | 36473156  | rs45756157  | A                 | G            | Anxa5   | Reg variation                      | mus_musculus |    |    |    |    |
| 3 | 36473190  | rs50278056  | C                 | T            | Anxa5   | Reg variation                      | mus_musculus |    |    |    |    |
| 3 | 36473238  | rs50428340  | A                 | T            | Anxa5   | Reg variation                      | mus_musculus |    |    |    |    |
| 3 | 36473258  | rs50075866  | A                 | C            | Anxa5   | Reg variation                      | mus_musculus |    |    |    |    |

|   |           |                          |                |                                     |        |                                    |              |       |         |       |          |
|---|-----------|--------------------------|----------------|-------------------------------------|--------|------------------------------------|--------------|-------|---------|-------|----------|
| 3 | 36473393  | rs51992633               | G              | A                                   | Anxa5  | Reg variation                      | mus_musculus |       |         |       |          |
| 3 | 36473395  | rs51679010               | A              | G                                   | Anxa5  | Reg variation                      | mus_musculus |       |         |       |          |
| 3 | 36473650  | rs47878045               | G              | A                                   | Anxa5  | Reg variation                      | mus_musculus |       |         |       |          |
| 3 | 36473672  | rs259397596              | T              | C                                   | Anxa5  | Reg variation                      | mus_musculus |       |         |       |          |
| 3 | 36473685  | rs219027115              | C              | A                                   | Anxa5  | Reg variation                      | mus_musculus |       |         |       |          |
| 3 | 36473691  | rs236309833              | G              | A                                   | Anxa5  | Reg variation                      | mus_musculus |       |         |       |          |
| 3 | 36473692  | rs253625610              | G              | A                                   | Anxa5  | Reg variation                      | mus_musculus |       |         |       |          |
| 3 | 36473791  | rs45767748               | G              | A                                   | Anxa5  | Reg variation                      | mus_musculus |       |         |       |          |
| 3 | 36473845  | rs48593123               | A              | G                                   | Anxa5  | Reg variation                      | mus_musculus |       |         |       |          |
| 3 | 36473914  | rs227923361              | A              | G                                   | Anxa5  | Reg variation                      | mus_musculus |       |         |       |          |
| 3 | 36473948  | rs254512693              | C              | T                                   | Anxa5  | Reg variation                      | mus_musculus |       |         |       |          |
| 3 | 36473949  | rs218491733              | A              | G                                   | Anxa5  | Reg variation                      | mus_musculus |       |         |       |          |
| 3 | 36474158  | rs586443431              | G              | A                                   | Anxa5  | Reg variation                      | mus_musculus |       |         |       |          |
| 3 | 36474204  | rs585466588              | A              | G                                   | Anxa5  | Reg variation                      | mus_musculus |       |         |       |          |
| 3 | 36474212  | rs229559591              | A              | G                                   | Anxa5  | Reg variation                      | mus_musculus |       |         |       |          |
| 3 | 36474283  | rs579917461              | G              | A                                   | Anxa5  | Reg variation                      | mus_musculus |       |         |       |          |
| 3 | 36474653  | rs30755037               | A              | G                                   | Anxa5  | Reg variation                      | mus_musculus |       |         |       |          |
| 3 | 36474977  | rs30960669               | T              | C                                   | Anxa5  | Reg variation                      | mus_musculus |       |         |       |          |
| 3 | 36475007  | rs31479279               | G              | C                                   | Anxa5  | Reg variation                      | mus_musculus |       |         |       |          |
| 3 | 36449050  | rs51183489               | G              | A                                   | Anxa5  | UTR variation                      | mus_musculus |       |         |       |          |
| 3 | 28729196  | rs228697934              | T              | TAC                                 | Slc2a2 | Reg variation                      | mus_musculus |       |         |       |          |
| 3 | 129574413 | rs2255703                | T              | C                                   | PLXND1 | upstream_gene_variant              | homo sapiens |       |         |       |          |
| 3 | 129574413 | rs2255703                | T              | C                                   | PLXND1 | non_coding_transcript_exon_variant | homo sapiens |       |         |       |          |
| 3 | 129574413 | rs2255703                | T              | C                                   | PLXND1 | missense_variant                   | homo sapiens | --    | --      | --    | --       |
| 3 | 129614339 | rs9828772                | C              | G                                   | PLXND1 |                                    | homo sapiens |       |         |       |          |
| 3 | 77622570  | rs2272163                | C              | A                                   | ROBO2  | downstream_gene_variant            | homo sapiens |       |         |       |          |
| 3 | 77622570  | rs2272163                | C              | A                                   | ROBO2  | intron_variant                     | homo sapiens |       |         |       |          |
| 3 | 77622570  | rs2272163                | C              | A                                   | ROBO2  | NMD_transcript_variant             | homo sapiens |       |         |       |          |
| 3 | 171007094 | rs8192675                | T              | C                                   | SLC2A2 | NMD_transcript_variant             | homo sapiens |       |         |       |          |
| 3 | 171007094 | rs8192675                | T              | C                                   | SLC2A2 | intron_variant                     | homo sapiens |       |         |       |          |
| 3 | 170925999 | rs201018682              | T              | C                                   | SLC2A2 |                                    | homo sapiens |       |         |       |          |
| 3 | 171015287 | rs9873618                | G              | A                                   | SLC2A2 | NMD_transcript_variant             | homo sapiens |       |         |       |          |
| 3 | 171007094 | rs8192675                | T              | C                                   | SLC2A2 | non_coding_transcript_variant      | homo sapiens |       |         |       |          |
| 3 | 171015287 | rs9873618                | G              | A                                   | SLC2A2 | intron_variant                     | homo sapiens |       |         |       |          |
| 3 | 149503776 | rs28712435               | C              | T                                   | TM4SF4 | downstream_gene_variant            | homo sapiens |       |         |       |          |
| 3 | 149478965 | rs34573045               | C              | G                                   | TM4SF4 | intron_variant                     | homo sapiens |       |         |       |          |
| 3 | 149478965 | rs34573045               | C              | G                                   | TM4SF4 | non_coding_transcript_variant      | homo sapiens |       |         |       |          |
| 3 | 115131989 | rs73230612               | C              | T                                   | ZBTB20 | non_coding_transcript_variant      | homo sapiens |       |         |       |          |
| 3 | 115194661 | rs6438234                | A              | G                                   | ZBTB20 |                                    | homo sapiens |       |         |       |          |
| 3 | 115131989 | rs73230612               | C              | T                                   | ZBTB20 | intron_variant                     | homo sapiens |       |         |       |          |
| 3 | 115249171 | rs6806156                | C              | G, T                                | ZBTB20 |                                    | homo sapiens |       |         |       |          |
| 4 | 98505712  | rs222131769              | G              | C                                   | Patj   | missense_variant                   | mus_musculus | 1.43  | Neutral | 0.014 | Damaging |
| 4 | 98667618  | rs244911511              | G              | A                                   | Patj   | missense_variant                   | mus_musculus | -2.23 | Neutral | 0.033 | Damaging |
| 4 | 98436899  | rs255498199              | C              | CG                                  | Patj   | Reg variation                      | mus_musculus |       |         |       |          |
| 4 | 98508851  | rs227021009              | A              | AT                                  | Patj   | Reg variation                      | mus_musculus |       |         |       |          |
| 4 | 98510473  | rs234366805              | AT             | A                                   | Patj   | Reg variation                      | mus_musculus |       |         |       |          |
| 4 | 98510751  | .                        | AAAAAAACAAAAAC | A                                   | Patj   | Reg variation                      | mus_musculus |       |         |       |          |
| 4 | 98510815  | rs212053739              | C              | CATTT                               | Patj   | Reg variation                      | mus_musculus |       |         |       |          |
| 4 | 98512464  | .                        | A              | ACT                                 | Patj   | Reg variation                      | mus_musculus |       |         |       |          |
| 4 | 98512468  | .                        | T              | TCTCGAACAACAACAACA                  | Patj   | Reg variation                      | mus_musculus |       |         |       |          |
| 4 | 98513005  | rs254049124              | C              | CCCCACACACACACA,<br>CCCCACACACACACA | Patj   | Reg variation                      | mus_musculus |       |         |       |          |
| 4 | 98517211  | rs242608371; rs228382018 | ATGTGTG        | ATG, A                              | Patj   | Reg variation                      | mus_musculus |       |         |       |          |
| 4 | 98539958  | rs241963356              | TATAAGTAGA     | T                                   | Patj   | Reg variation                      | mus_musculus |       |         |       |          |

|   |          |                          |          |            |      |               |              |  |  |  |  |
|---|----------|--------------------------|----------|------------|------|---------------|--------------|--|--|--|--|
| 4 | 98541590 | rs228555126              | GTTTTTTT | G          | Patj | Reg variation | mus_musculus |  |  |  |  |
| 4 | 98544302 | rs213307809; rs250459305 | T        | TACACACAC  | Patj | Reg variation | mus_musculus |  |  |  |  |
| 4 | 98553561 | rs229833628              | C        | CT         | Patj | Reg variation | mus_musculus |  |  |  |  |
| 4 | 98556168 | rs233251436              | AT       | A          | Patj | Reg variation | mus_musculus |  |  |  |  |
| 4 | 98557659 | rs244172423              | TG       | T          | Patj | Reg variation | mus_musculus |  |  |  |  |
| 4 | 98557902 | rs224939282              | CA       | C          | Patj | Reg variation | mus_musculus |  |  |  |  |
| 4 | 98560128 | rs251012532; rs238113651 | G        | GA         | Patj | Reg variation | mus_musculus |  |  |  |  |
| 4 | 98560667 | rs244415962              | GT       | G          | Patj | Reg variation | mus_musculus |  |  |  |  |
| 4 | 98561653 | rs224583259              | TGTG     | T          | Patj | Reg variation | mus_musculus |  |  |  |  |
| 4 | 98675835 | rs265604669; rs212214218 | A        | AAATAATAAT | Patj | Reg variation | mus_musculus |  |  |  |  |
| 4 | 98679398 | .                        | G        | GTA        | Patj | Reg variation | mus_musculus |  |  |  |  |
| 4 | 98395803 | rs32505331               | G        | C          | Patj | Reg variation | mus_musculus |  |  |  |  |
| 4 | 98432227 | rs252880047              | C        | T          | Patj | Reg variation | mus_musculus |  |  |  |  |
| 4 | 98438036 | rs578820017              | C        | A          | Patj | Reg variation | mus_musculus |  |  |  |  |
| 4 | 98443424 | rs28112563               | A        | G          | Patj | Reg variation | mus_musculus |  |  |  |  |
| 4 | 98447746 | rs212008438              | T        | C          | Patj | Reg variation | mus_musculus |  |  |  |  |
| 4 | 98501875 | .                        | T        | G          | Patj | Reg variation | mus_musculus |  |  |  |  |
| 4 | 98501926 | rs216656994              | A        | G          | Patj | Reg variation | mus_musculus |  |  |  |  |
| 4 | 98508887 | rs252327099              | C        | T          | Patj | Reg variation | mus_musculus |  |  |  |  |
| 4 | 98509188 | rs6313320                | T        | C          | Patj | Reg variation | mus_musculus |  |  |  |  |
| 4 | 98509432 | rs219136456              | C        | C          | Patj | Reg variation | mus_musculus |  |  |  |  |
| 4 | 98509570 | rs28096786               | C        | T          | Patj | Reg variation | mus_musculus |  |  |  |  |
| 4 | 98509851 | rs241016457              | C        | T          | Patj | Reg variation | mus_musculus |  |  |  |  |
| 4 | 98510123 | rs220489168              | G        | A          | Patj | Reg variation | mus_musculus |  |  |  |  |
| 4 | 98510404 | rs28096777               | A        | G          | Patj | Reg variation | mus_musculus |  |  |  |  |
| 4 | 98510683 | rs249874330              | T        | C          | Patj | Reg variation | mus_musculus |  |  |  |  |
| 4 | 98510754 | .                        | A        | C          | Patj | Reg variation | mus_musculus |  |  |  |  |
| 4 | 98510828 | .                        | A        | G          | Patj | Reg variation | mus_musculus |  |  |  |  |
| 4 | 98510895 | rs227062210              | C        | T          | Patj | Reg variation | mus_musculus |  |  |  |  |
| 4 | 98511377 | rs227042334              | G        | A          | Patj | Reg variation | mus_musculus |  |  |  |  |
| 4 | 98511388 | rs257619079              | T        | C          | Patj | Reg variation | mus_musculus |  |  |  |  |
| 4 | 98511393 | rs245545315              | G        | A          | Patj | Reg variation | mus_musculus |  |  |  |  |
| 4 | 98512263 | rs217442348              | T        | A          | Patj | Reg variation | mus_musculus |  |  |  |  |
| 4 | 98512375 | rs214293886              | C        | T          | Patj | Reg variation | mus_musculus |  |  |  |  |
| 4 | 98512858 | rs28096766               | G        | A          | Patj | Reg variation | mus_musculus |  |  |  |  |
| 4 | 98513155 | rs28096764               | C        | T          | Patj | Reg variation | mus_musculus |  |  |  |  |
| 4 | 98514547 | rs28096744               | A        | G          | Patj | Reg variation | mus_musculus |  |  |  |  |
| 4 | 98515894 | rs255180011              | G        | A          | Patj | Reg variation | mus_musculus |  |  |  |  |
| 4 | 98518727 | rs28096705               | T        | C          | Patj | Reg variation | mus_musculus |  |  |  |  |
| 4 | 98518751 | rs28096704               | C        | A          | Patj | Reg variation | mus_musculus |  |  |  |  |
| 4 | 98518794 | rs253382414              | G        | C          | Patj | Reg variation | mus_musculus |  |  |  |  |
| 4 | 98518803 | rs28096703               | G        | A          | Patj | Reg variation | mus_musculus |  |  |  |  |
| 4 | 98518876 | rs28096702               | A        | C          | Patj | Reg variation | mus_musculus |  |  |  |  |
| 4 | 98539551 | rs28080695               | G        | A          | Patj | Reg variation | mus_musculus |  |  |  |  |
| 4 | 98539642 | rs264642174              | G        | A          | Patj | Reg variation | mus_musculus |  |  |  |  |
| 4 | 98539863 | rs212723010              | G        | A          | Patj | Reg variation | mus_musculus |  |  |  |  |
| 4 | 98540255 | rs227160243              | G        | A          | Patj | Reg variation | mus_musculus |  |  |  |  |
| 4 | 98540285 | rs28080688               | A        | C          | Patj | Reg variation | mus_musculus |  |  |  |  |
| 4 | 98540935 | rs28080678               | T        | C          | Patj | Reg variation | mus_musculus |  |  |  |  |
| 4 | 98541775 | rs28080669               | T        | C          | Patj | Reg variation | mus_musculus |  |  |  |  |
| 4 | 98544194 | rs213143926              | C        | A          | Patj | Reg variation | mus_musculus |  |  |  |  |
| 4 | 98544701 | rs28080654               | G        | A          | Patj | Reg variation | mus_musculus |  |  |  |  |
| 4 | 98544898 | rs261965364              | C        | T          | Patj | Reg variation | mus_musculus |  |  |  |  |
| 4 | 98545119 | rs28080650               | T        | C          | Patj | Reg variation | mus_musculus |  |  |  |  |

|   |           |                          |        |      |        |                               |              |  |  |  |  |
|---|-----------|--------------------------|--------|------|--------|-------------------------------|--------------|--|--|--|--|
| 4 | 98545532  | rs264888098              | A      | T    | Patj   | Reg variation                 | mus_musculus |  |  |  |  |
| 4 | 98545962  | rs28080645               | A      | C    | Patj   | Reg variation                 | mus_musculus |  |  |  |  |
| 4 | 98546670  | rs28080641               | G      | A    | Patj   | Reg variation                 | mus_musculus |  |  |  |  |
| 4 | 98552747  | rs246702738              | T      | C    | Patj   | Reg variation                 | mus_musculus |  |  |  |  |
| 4 | 98552885  | rs231047020              | A      | G    | Patj   | Reg variation                 | mus_musculus |  |  |  |  |
| 4 | 98552895  | rs250535411              | T      | A    | Patj   | Reg variation                 | mus_musculus |  |  |  |  |
| 4 | 98552909  | rs213249750              | A      | G    | Patj   | Reg variation                 | mus_musculus |  |  |  |  |
| 4 | 98552918  | rs234690741              | C      | G    | Patj   | Reg variation                 | mus_musculus |  |  |  |  |
| 4 | 98553294  | rs247408662              | T      | C    | Patj   | Reg variation                 | mus_musculus |  |  |  |  |
| 4 | 98553297  | rs216392628              | A      | G    | Patj   | Reg variation                 | mus_musculus |  |  |  |  |
| 4 | 98553421  | rs249020227              | C      | T    | Patj   | Reg variation                 | mus_musculus |  |  |  |  |
| 4 | 98554884  | rs28080579               | A      | C    | Patj   | Reg variation                 | mus_musculus |  |  |  |  |
| 4 | 98554990  | rs220422905              | A      | C    | Patj   | Reg variation                 | mus_musculus |  |  |  |  |
| 4 | 98555066  | rs254603011              | A      | T    | Patj   | Reg variation                 | mus_musculus |  |  |  |  |
| 4 | 98555112  | rs245667526              | G      | A    | Patj   | Reg variation                 | mus_musculus |  |  |  |  |
| 4 | 98555234  | rs28080575               | A      | G    | Patj   | Reg variation                 | mus_musculus |  |  |  |  |
| 4 | 98555252  | rs28080574               | T      | C    | Patj   | Reg variation                 | mus_musculus |  |  |  |  |
| 4 | 98555349  | rs265335291              | A      | T    | Patj   | Reg variation                 | mus_musculus |  |  |  |  |
| 4 | 98555593  | rs28080571               | T      | C    | Patj   | Reg variation                 | mus_musculus |  |  |  |  |
| 4 | 98555623  | rs28080570               | A      | G    | Patj   | Reg variation                 | mus_musculus |  |  |  |  |
| 4 | 98555648  | rs32734551               | A      | T    | Patj   | Reg variation                 | mus_musculus |  |  |  |  |
| 4 | 98555668  | rs231478968              | A      | C    | Patj   | Reg variation                 | mus_musculus |  |  |  |  |
| 4 | 98556014  | rs238106353              | A      | G    | Patj   | Reg variation                 | mus_musculus |  |  |  |  |
| 4 | 98557568  | rs33027660               | A      | G    | Patj   | Reg variation                 | mus_musculus |  |  |  |  |
| 4 | 98560029  | rs242854015              | C      | T    | Patj   | Reg variation                 | mus_musculus |  |  |  |  |
| 4 | 98560084  | rs6174249                | T      | C    | Patj   | Reg variation                 | mus_musculus |  |  |  |  |
| 4 | 98560512  | rs254842854              | G      | A    | Patj   | Reg variation                 | mus_musculus |  |  |  |  |
| 4 | 98560565  | rs222199972              | C      | A    | Patj   | Reg variation                 | mus_musculus |  |  |  |  |
| 4 | 98560624  | rs240605041              | G      | T    | Patj   | Reg variation                 | mus_musculus |  |  |  |  |
| 4 | 98560684  | rs217004305              | T      | G    | Patj   | Reg variation                 | mus_musculus |  |  |  |  |
| 4 | 98561829  | rs28080537               | C      | G    | Patj   | Reg variation                 | mus_musculus |  |  |  |  |
| 4 | 98561973  | rs240334848              | A      | G    | Patj   | Reg variation                 | mus_musculus |  |  |  |  |
| 4 | 98667618  | rs244911511              | G      | A    | Patj   | Reg variation                 | mus_musculus |  |  |  |  |
| 4 | 98674709  | rs3659036                | A      | T    | Patj   | Reg variation                 | mus_musculus |  |  |  |  |
| 4 | 98395803  | rs32505331               | G      | C    | Patj   | UTR variation                 | mus_musculus |  |  |  |  |
| 4 | 121744359 | rs7659604                | C      | T    | ANXA5  |                               | homo sapiens |  |  |  |  |
| 4 | 185658908 | rs35901985               | A      | C, G | SORBS2 | downstream_gene_variant       | homo sapiens |  |  |  |  |
| 4 | 185658908 | rs35901985               | A      | C, G | SORBS2 | upstream_gene_variant         | homo sapiens |  |  |  |  |
| 4 | 185658908 | rs35901985               | A      | C, G | SORBS2 | intron_variant                | homo sapiens |  |  |  |  |
| 4 | 185658908 | rs35901985               | A      | C, G | SORBS2 | non_coding_transcript_variant | homo sapiens |  |  |  |  |
| 5 | 131437449 | rs251456242; rs250794822 | C      | CT   | Auts2  | Reg variation                 | mus_musculus |  |  |  |  |
| 5 | 131437600 | rs221399601              | AT     | A    | Auts2  | Reg variation                 | mus_musculus |  |  |  |  |
| 5 | 131437628 | rs235082415              | TA     | T    | Auts2  | Reg variation                 | mus_musculus |  |  |  |  |
| 5 | 131438015 | rs229062311              | AACAC  | A    | Auts2  | Reg variation                 | mus_musculus |  |  |  |  |
| 5 | 131439376 | rs226419934; rs214003274 | T      | TG   | Auts2  | Reg variation                 | mus_musculus |  |  |  |  |
| 5 | 131441304 | rs218386400; rs262455131 | T      | TGGG | Auts2  | Reg variation                 | mus_musculus |  |  |  |  |
| 5 | 131442455 | rs258663662              | C      | CACT | Auts2  | Reg variation                 | mus_musculus |  |  |  |  |
| 5 | 131442643 | rs242516199              | T      | TC   | Auts2  | Reg variation                 | mus_musculus |  |  |  |  |
| 5 | 131442891 | rs212526747              | AAAAC  | A    | Auts2  | Reg variation                 | mus_musculus |  |  |  |  |
| 5 | 131443013 | rs219464078              | AC     | A    | Auts2  | Reg variation                 | mus_musculus |  |  |  |  |
| 5 | 131443383 | rs228332182              | C      | CG   | Auts2  | Reg variation                 | mus_musculus |  |  |  |  |
| 5 | 131444170 | rs236860243; rs212489768 | TTGTC  | T    | Auts2  | Reg variation                 | mus_musculus |  |  |  |  |
| 5 | 131445307 | rs239510287              | TAA    | T    | Auts2  | Reg variation                 | mus_musculus |  |  |  |  |
| 5 | 131456339 | rs245513152              | GGGGGA | G    | Auts2  | Reg variation                 | mus_musculus |  |  |  |  |

|   |           |                          |                 |           |       |               |              |  |  |  |  |
|---|-----------|--------------------------|-----------------|-----------|-------|---------------|--------------|--|--|--|--|
| 5 | 131456497 | rs227026560              | C               | CCCTT     | Auts2 | Reg variation | mus_musculus |  |  |  |  |
| 5 | 131456664 | rs232593870              | ACC             | A         | Auts2 | Reg variation | mus_musculus |  |  |  |  |
| 5 | 131459588 | rs227675354              | TTA             | T         | Auts2 | Reg variation | mus_musculus |  |  |  |  |
| 5 | 131460894 | rs220970828              | GGTGT           | GGT, G    | Auts2 | Reg variation | mus_musculus |  |  |  |  |
| 5 | 131464067 | rs218493545              | A               | AG        | Auts2 | Reg variation | mus_musculus |  |  |  |  |
| 5 | 131464458 | rs223010296              | GTA             | G         | Auts2 | Reg variation | mus_musculus |  |  |  |  |
| 5 | 131464655 | rs224548034              | G               | GATCTCTTA | Auts2 | Reg variation | mus_musculus |  |  |  |  |
| 5 | 131471067 | rs263328219              | CTGGGCAA        | C         | Auts2 | Reg variation | mus_musculus |  |  |  |  |
| 5 | 131471295 | rs243366062              | TAA             | T         | Auts2 | Reg variation | mus_musculus |  |  |  |  |
| 5 | 131471381 | .                        | TTCCCCCCCCCCCCC | T         | Auts2 | Reg variation | mus_musculus |  |  |  |  |
| 5 | 131474454 | rs265601489              | GCACACACACA     | G         | Auts2 | Reg variation | mus_musculus |  |  |  |  |
| 5 | 131476702 | rs217962247              | A               | AG        | Auts2 | Reg variation | mus_musculus |  |  |  |  |
| 5 | 131477966 | .                        | A               | AAG       | Auts2 | Reg variation | mus_musculus |  |  |  |  |
| 5 | 131478548 | rs217277700              | TG              | T         | Auts2 | Reg variation | mus_musculus |  |  |  |  |
| 5 | 131480674 | rs241318949              | AT              | A         | Auts2 | Reg variation | mus_musculus |  |  |  |  |
| 5 | 131534571 | rs241723894              | CG              | C         | Auts2 | Reg variation | mus_musculus |  |  |  |  |
| 5 | 131535246 | rs257419139              | C               | CT        | Auts2 | Reg variation | mus_musculus |  |  |  |  |
| 5 | 131535621 | rs257842382              | GGAA            | GA, G     | Auts2 | Reg variation | mus_musculus |  |  |  |  |
| 5 | 131535767 | rs250145991              | GAAA            | G         | Auts2 | Reg variation | mus_musculus |  |  |  |  |
| 5 | 131536660 | rs228696504              | A               | AT        | Auts2 | Reg variation | mus_musculus |  |  |  |  |
| 5 | 131538229 | rs222895439              | GGGA            | G         | Auts2 | Reg variation | mus_musculus |  |  |  |  |
| 5 | 131539471 | rs240832849              | C               | CA        | Auts2 | Reg variation | mus_musculus |  |  |  |  |
| 5 | 131539786 | rs236678420              | C               | CCTGT     | Auts2 | Reg variation | mus_musculus |  |  |  |  |
| 5 | 131541335 | rs257094965              | A               | ATG       | Auts2 | Reg variation | mus_musculus |  |  |  |  |
| 5 | 131573276 | rs258955008; rs242840169 | GTTTTT          | G         | Auts2 | Reg variation | mus_musculus |  |  |  |  |
| 5 | 131574761 | rs245996398              | C               | CAG       | Auts2 | Reg variation | mus_musculus |  |  |  |  |
| 5 | 131576863 | rs226782757              | ATTTTG          | A         | Auts2 | Reg variation | mus_musculus |  |  |  |  |
| 5 | 131576909 | .                        | T               | TTTG      | Auts2 | Reg variation | mus_musculus |  |  |  |  |
| 5 | 131577087 | rs227398531; rs251078321 | TA              | T         | Auts2 | Reg variation | mus_musculus |  |  |  |  |
| 5 | 131577714 | rs256452366              | TTCTC           | T         | Auts2 | Reg variation | mus_musculus |  |  |  |  |
| 5 | 131578627 | rs222381795; rs218902979 | T               | TAA       | Auts2 | Reg variation | mus_musculus |  |  |  |  |
| 5 | 131578696 | rs228568603              | AT              | A         | Auts2 | Reg variation | mus_musculus |  |  |  |  |
| 5 | 131579089 | rs228552820              | G               | GAA       | Auts2 | Reg variation | mus_musculus |  |  |  |  |
| 5 | 131579544 | rs256724120; rs213933110 | C               | CT        | Auts2 | Reg variation | mus_musculus |  |  |  |  |
| 5 | 131617717 | rs215189639              | C               | CAG       | Auts2 | Reg variation | mus_musculus |  |  |  |  |
| 5 | 131619600 | rs223536680              | C               | CT        | Auts2 | Reg variation | mus_musculus |  |  |  |  |
| 5 | 131620289 | rs217478359              | G               | GAA       | Auts2 | Reg variation | mus_musculus |  |  |  |  |
| 5 | 131621145 | .                        | TTTG            | T         | Auts2 | Reg variation | mus_musculus |  |  |  |  |
| 5 | 131621235 | rs250494063              | TTA             | T         | Auts2 | Reg variation | mus_musculus |  |  |  |  |
| 5 | 131763732 | rs251660290              | T               | TCAAA     | Auts2 | Reg variation | mus_musculus |  |  |  |  |
| 5 | 132021278 | rs243735126              | CTTGTTGT        | C         | Auts2 | Reg variation | mus_musculus |  |  |  |  |
| 5 | 132028746 | rs248285978              | GAAACA          | G         | Auts2 | Reg variation | mus_musculus |  |  |  |  |
| 5 | 132029457 | .                        | AAC             | A         | Auts2 | Reg variation | mus_musculus |  |  |  |  |
| 5 | 132029477 | .                        | A               | AC        | Auts2 | Reg variation | mus_musculus |  |  |  |  |
| 5 | 132451283 | rs246325470; rs253417161 | A               | AT        | Auts2 | Reg variation | mus_musculus |  |  |  |  |
| 5 | 131440847 | rs222159843              | C               | A         | Auts2 | Reg variation | mus_musculus |  |  |  |  |
| 5 | 131440851 | rs244462702              | C               | G         | Auts2 | Reg variation | mus_musculus |  |  |  |  |
| 5 | 131441410 | rs241706023              | T               | C         | Auts2 | Reg variation | mus_musculus |  |  |  |  |
| 5 | 131441429 | rs250806060              | A               | G         | Auts2 | Reg variation | mus_musculus |  |  |  |  |
| 5 | 131441749 | rs250354631              | T               | C         | Auts2 | Reg variation | mus_musculus |  |  |  |  |
| 5 | 131441872 | rs37958873               | T               | A         | Auts2 | Reg variation | mus_musculus |  |  |  |  |
| 5 | 131442025 | rs37518619               | T               | C         | Auts2 | Reg variation | mus_musculus |  |  |  |  |
| 5 | 131442349 | rs251504230              | C               | T         | Auts2 | Reg variation | mus_musculus |  |  |  |  |
| 5 | 131442761 | rs211875931              | C               | G         | Auts2 | Reg variation | mus_musculus |  |  |  |  |

|   |           |             |   |   |       |               |              |  |  |  |  |
|---|-----------|-------------|---|---|-------|---------------|--------------|--|--|--|--|
| 5 | 131442772 | rs36874083  | G | T | Auts2 | Reg variation | mus_musculus |  |  |  |  |
| 5 | 131442844 | rs37598960  | G | A | Auts2 | Reg variation | mus_musculus |  |  |  |  |
| 5 | 131442857 | rs227037262 | A | G | Auts2 | Reg variation | mus_musculus |  |  |  |  |
| 5 | 131442859 | rs37313364  | C | G | Auts2 | Reg variation | mus_musculus |  |  |  |  |
| 5 | 131442894 | .           | A | C | Auts2 | Reg variation | mus_musculus |  |  |  |  |
| 5 | 131442973 | rs36960138  | T | C | Auts2 | Reg variation | mus_musculus |  |  |  |  |
| 5 | 131442986 | rs37863081  | C | T | Auts2 | Reg variation | mus_musculus |  |  |  |  |
| 5 | 131443063 | rs239868029 | C | A | Auts2 | Reg variation | mus_musculus |  |  |  |  |
| 5 | 131443197 | rs36540678  | A | G | Auts2 | Reg variation | mus_musculus |  |  |  |  |
| 5 | 131443303 | rs36423922  | A | G | Auts2 | Reg variation | mus_musculus |  |  |  |  |
| 5 | 131443327 | rs261393076 | G | A | Auts2 | Reg variation | mus_musculus |  |  |  |  |
| 5 | 131443366 | rs225898893 | T | C | Auts2 | Reg variation | mus_musculus |  |  |  |  |
| 5 | 131444147 | rs37048309  | A | G | Auts2 | Reg variation | mus_musculus |  |  |  |  |
| 5 | 131444236 | rs261728789 | T | C | Auts2 | Reg variation | mus_musculus |  |  |  |  |
| 5 | 131444413 | rs237293489 | C | T | Auts2 | Reg variation | mus_musculus |  |  |  |  |
| 5 | 131444775 | rs251399214 | T | C | Auts2 | Reg variation | mus_musculus |  |  |  |  |
| 5 | 131444801 | rs216049711 | T | C | Auts2 | Reg variation | mus_musculus |  |  |  |  |
| 5 | 131444936 | rs225820862 | C | T | Auts2 | Reg variation | mus_musculus |  |  |  |  |
| 5 | 131444941 | rs245046202 | T | C | Auts2 | Reg variation | mus_musculus |  |  |  |  |
| 5 | 131445372 | rs37910317  | A | T | Auts2 | Reg variation | mus_musculus |  |  |  |  |
| 5 | 131456252 | rs235023593 | C | T | Auts2 | Reg variation | mus_musculus |  |  |  |  |
| 5 | 131456256 | rs262631823 | G | A | Auts2 | Reg variation | mus_musculus |  |  |  |  |
| 5 | 131456451 | rs37804397  | C | T | Auts2 | Reg variation | mus_musculus |  |  |  |  |
| 5 | 131456517 | rs52192562  | T | C | Auts2 | Reg variation | mus_musculus |  |  |  |  |
| 5 | 131456565 | rs52404478  | G | A | Auts2 | Reg variation | mus_musculus |  |  |  |  |
| 5 | 131457103 | rs46487557  | A | G | Auts2 | Reg variation | mus_musculus |  |  |  |  |
| 5 | 131457125 | rs247556504 | C | T | Auts2 | Reg variation | mus_musculus |  |  |  |  |
| 5 | 131457279 | rs36959756  | T | C | Auts2 | Reg variation | mus_musculus |  |  |  |  |
| 5 | 131457281 | rs228088154 | C | A | Auts2 | Reg variation | mus_musculus |  |  |  |  |
| 5 | 131457504 | rs37541506  | A | G | Auts2 | Reg variation | mus_musculus |  |  |  |  |
| 5 | 131457576 | rs217623053 | C | T | Auts2 | Reg variation | mus_musculus |  |  |  |  |
| 5 | 131457607 | rs250557588 | T | C | Auts2 | Reg variation | mus_musculus |  |  |  |  |
| 5 | 131457720 | rs225058977 | A | G | Auts2 | Reg variation | mus_musculus |  |  |  |  |
| 5 | 131457788 | rs245116636 | T | C | Auts2 | Reg variation | mus_musculus |  |  |  |  |
| 5 | 131457842 | rs37973761  | G | C | Auts2 | Reg variation | mus_musculus |  |  |  |  |
| 5 | 131457860 | rs37108956  | A | G | Auts2 | Reg variation | mus_musculus |  |  |  |  |
| 5 | 131458076 | rs37072354  | A | C | Auts2 | Reg variation | mus_musculus |  |  |  |  |
| 5 | 131458207 | rs36429758  | C | T | Auts2 | Reg variation | mus_musculus |  |  |  |  |
| 5 | 131458424 | rs235697308 | A | G | Auts2 | Reg variation | mus_musculus |  |  |  |  |
| 5 | 131458587 | rs212358105 | A | G | Auts2 | Reg variation | mus_musculus |  |  |  |  |
| 5 | 131458604 | rs36724250  | A | C | Auts2 | Reg variation | mus_musculus |  |  |  |  |
| 5 | 131458651 | rs216686333 | T | C | Auts2 | Reg variation | mus_musculus |  |  |  |  |
| 5 | 131458938 | rs265627814 | C | T | Auts2 | Reg variation | mus_musculus |  |  |  |  |
| 5 | 131458943 | rs232763284 | C | T | Auts2 | Reg variation | mus_musculus |  |  |  |  |
| 5 | 131459187 | rs231354912 | C | A | Auts2 | Reg variation | mus_musculus |  |  |  |  |
| 5 | 131459193 | rs250829726 | T | C | Auts2 | Reg variation | mus_musculus |  |  |  |  |
| 5 | 131459269 | rs37165680  | G | A | Auts2 | Reg variation | mus_musculus |  |  |  |  |
| 5 | 131459417 | rs36278582  | A | G | Auts2 | Reg variation | mus_musculus |  |  |  |  |
| 5 | 131459642 | .           | A | G | Auts2 | Reg variation | mus_musculus |  |  |  |  |
| 5 | 131459650 | .           | A | G | Auts2 | Reg variation | mus_musculus |  |  |  |  |
| 5 | 131460066 | rs36357003  | C | T | Auts2 | Reg variation | mus_musculus |  |  |  |  |
| 5 | 131460236 | rs226877754 | T | C | Auts2 | Reg variation | mus_musculus |  |  |  |  |
| 5 | 131462646 | rs36815230  | T | C | Auts2 | Reg variation | mus_musculus |  |  |  |  |
| 5 | 131463288 | rs213065234 | G | A | Auts2 | Reg variation | mus_musculus |  |  |  |  |



|   |           |             |   |   |       |               |              |  |  |  |  |
|---|-----------|-------------|---|---|-------|---------------|--------------|--|--|--|--|
| 5 | 131463471 | rs37048970  | G | A | Auts2 | Reg variation | mus_musculus |  |  |  |  |
| 5 | 131463748 | rs37056508  | A | G | Auts2 | Reg variation | mus_musculus |  |  |  |  |
| 5 | 131463903 | rs227344639 | A | G | Auts2 | Reg variation | mus_musculus |  |  |  |  |
| 5 | 131464110 | rs38521833  | T | C | Auts2 | Reg variation | mus_musculus |  |  |  |  |
| 5 | 131464164 | rs254245346 | A | T | Auts2 | Reg variation | mus_musculus |  |  |  |  |
| 5 | 131464174 | rs213610103 | G | A | Auts2 | Reg variation | mus_musculus |  |  |  |  |
| 5 | 131464301 | rs234944751 | C | A | Auts2 | Reg variation | mus_musculus |  |  |  |  |
| 5 | 131464312 | rs252968954 | G | C | Auts2 | Reg variation | mus_musculus |  |  |  |  |
| 5 | 131464475 | rs220056386 | C | G | Auts2 | Reg variation | mus_musculus |  |  |  |  |
| 5 | 131464536 | rs582295825 | C | A | Auts2 | Reg variation | mus_musculus |  |  |  |  |
| 5 | 131464538 | rs585658055 | T | C | Auts2 | Reg variation | mus_musculus |  |  |  |  |
| 5 | 131464542 | rs265036395 | C | A | Auts2 | Reg variation | mus_musculus |  |  |  |  |
| 5 | 131464549 | rs579574849 | A | G | Auts2 | Reg variation | mus_musculus |  |  |  |  |
| 5 | 131464580 | rs238931510 | C | T | Auts2 | Reg variation | mus_musculus |  |  |  |  |
| 5 | 131464650 | rs37810979  | C | T | Auts2 | Reg variation | mus_musculus |  |  |  |  |
| 5 | 131464808 | rs262166345 | T | C | Auts2 | Reg variation | mus_musculus |  |  |  |  |
| 5 | 131464859 | rs228718923 | A | C | Auts2 | Reg variation | mus_musculus |  |  |  |  |
| 5 | 131464917 | rs246623277 | T | C | Auts2 | Reg variation | mus_musculus |  |  |  |  |
| 5 | 131464974 | rs217509657 | T | G | Auts2 | Reg variation | mus_musculus |  |  |  |  |
| 5 | 131465043 | rs37663865  | T | C | Auts2 | Reg variation | mus_musculus |  |  |  |  |
| 5 | 131465067 | rs261600957 | T | C | Auts2 | Reg variation | mus_musculus |  |  |  |  |
| 5 | 131470562 | rs246231096 | T | C | Auts2 | Reg variation | mus_musculus |  |  |  |  |
| 5 | 131470574 | rs36549812  | A | C | Auts2 | Reg variation | mus_musculus |  |  |  |  |
| 5 | 131470801 | rs234788074 | C | T | Auts2 | Reg variation | mus_musculus |  |  |  |  |
| 5 | 131470993 | rs241201783 | A | T | Auts2 | Reg variation | mus_musculus |  |  |  |  |
| 5 | 131471010 | rs258980660 | T | G | Auts2 | Reg variation | mus_musculus |  |  |  |  |
| 5 | 131471021 | rs226520843 | A | G | Auts2 | Reg variation | mus_musculus |  |  |  |  |
| 5 | 131471022 | rs249884471 | A | G | Auts2 | Reg variation | mus_musculus |  |  |  |  |
| 5 | 131471065 | rs586884415 | C | T | Auts2 | Reg variation | mus_musculus |  |  |  |  |
| 5 | 131471080 | rs261842271 | A | C | Auts2 | Reg variation | mus_musculus |  |  |  |  |
| 5 | 131471115 | rs227835124 | T | C | Auts2 | Reg variation | mus_musculus |  |  |  |  |
| 5 | 131471136 | rs244307435 | G | A | Auts2 | Reg variation | mus_musculus |  |  |  |  |
| 5 | 131471139 | rs255022012 | T | A | Auts2 | Reg variation | mus_musculus |  |  |  |  |
| 5 | 131471149 | rs225715042 | A | G | Auts2 | Reg variation | mus_musculus |  |  |  |  |
| 5 | 131471357 | rs234159170 | T | A | Auts2 | Reg variation | mus_musculus |  |  |  |  |
| 5 | 131471374 | rs259472712 | C | T | Auts2 | Reg variation | mus_musculus |  |  |  |  |
| 5 | 131471376 | rs213053834 | C | T | Auts2 | Reg variation | mus_musculus |  |  |  |  |
| 5 | 131471380 | rs230034518 | A | G | Auts2 | Reg variation | mus_musculus |  |  |  |  |
| 5 | 131471571 | rs234767592 | C | T | Auts2 | Reg variation | mus_musculus |  |  |  |  |
| 5 | 131471693 | rs37642691  | C | T | Auts2 | Reg variation | mus_musculus |  |  |  |  |
| 5 | 131471756 | rs247345750 | A | T | Auts2 | Reg variation | mus_musculus |  |  |  |  |
| 5 | 131471779 | rs36855580  | A | C | Auts2 | Reg variation | mus_musculus |  |  |  |  |
| 5 | 131471809 | rs36782050  | A | G | Auts2 | Reg variation | mus_musculus |  |  |  |  |
| 5 | 131471856 | rs238120328 | A | T | Auts2 | Reg variation | mus_musculus |  |  |  |  |
| 5 | 131471857 | rs255086935 | T | C | Auts2 | Reg variation | mus_musculus |  |  |  |  |
| 5 | 131472167 | rs213531721 | G | A | Auts2 | Reg variation | mus_musculus |  |  |  |  |
| 5 | 131472894 | rs262093367 | C | T | Auts2 | Reg variation | mus_musculus |  |  |  |  |
| 5 | 131475113 | rs261100010 | C | T | Auts2 | Reg variation | mus_musculus |  |  |  |  |
| 5 | 131476291 | rs224168350 | T | C | Auts2 | Reg variation | mus_musculus |  |  |  |  |
| 5 | 131478020 | rs37380396  | C | G | Auts2 | Reg variation | mus_musculus |  |  |  |  |
| 5 | 131478816 | rs249573665 | T | G | Auts2 | Reg variation | mus_musculus |  |  |  |  |
| 5 | 131479274 | rs249388810 | G | A | Auts2 | Reg variation | mus_musculus |  |  |  |  |
| 5 | 131479401 | rs227148441 | C | T | Auts2 | Reg variation | mus_musculus |  |  |  |  |
| 5 | 131479608 | rs234235413 | T | C | Auts2 | Reg variation | mus_musculus |  |  |  |  |

|   |           |             |   |   |       |               |              |  |  |  |  |
|---|-----------|-------------|---|---|-------|---------------|--------------|--|--|--|--|
| 5 | 131481570 | rs224758371 | A | G | Auts2 | Reg variation | mus_musculus |  |  |  |  |
| 5 | 131534437 | rs225348229 | T | C | Auts2 | Reg variation | mus_musculus |  |  |  |  |
| 5 | 131534444 | rs243842481 | C | T | Auts2 | Reg variation | mus_musculus |  |  |  |  |
| 5 | 131534572 | .           | G | C | Auts2 | Reg variation | mus_musculus |  |  |  |  |
| 5 | 131534922 | rs260344464 | G | A | Auts2 | Reg variation | mus_musculus |  |  |  |  |
| 5 | 131534923 | rs212927278 | G | A | Auts2 | Reg variation | mus_musculus |  |  |  |  |
| 5 | 131534926 | rs229978642 | G | C | Auts2 | Reg variation | mus_musculus |  |  |  |  |
| 5 | 131534968 | rs250415191 | T | C | Auts2 | Reg variation | mus_musculus |  |  |  |  |
| 5 | 131535125 | rs239884538 | G | A | Auts2 | Reg variation | mus_musculus |  |  |  |  |
| 5 | 131535269 | rs226467615 | A | G | Auts2 | Reg variation | mus_musculus |  |  |  |  |
| 5 | 131535438 | rs258682181 | A | G | Auts2 | Reg variation | mus_musculus |  |  |  |  |
| 5 | 131536108 | rs240972908 | C | T | Auts2 | Reg variation | mus_musculus |  |  |  |  |
| 5 | 131536497 | rs239366873 | G | C | Auts2 | Reg variation | mus_musculus |  |  |  |  |
| 5 | 131536508 | rs258720376 | C | T | Auts2 | Reg variation | mus_musculus |  |  |  |  |
| 5 | 131536509 | rs219904291 | T | C | Auts2 | Reg variation | mus_musculus |  |  |  |  |
| 5 | 131536517 | rs249558323 | T | C | Auts2 | Reg variation | mus_musculus |  |  |  |  |
| 5 | 131536648 | rs387628947 | T | C | Auts2 | Reg variation | mus_musculus |  |  |  |  |
| 5 | 131538723 | rs211901759 | C | G | Auts2 | Reg variation | mus_musculus |  |  |  |  |
| 5 | 131539045 | rs249174800 | T | C | Auts2 | Reg variation | mus_musculus |  |  |  |  |
| 5 | 131539047 | rs218163673 | T | A | Auts2 | Reg variation | mus_musculus |  |  |  |  |
| 5 | 131539056 | rs238606286 | T | A | Auts2 | Reg variation | mus_musculus |  |  |  |  |
| 5 | 131539070 | rs255588084 | G | C | Auts2 | Reg variation | mus_musculus |  |  |  |  |
| 5 | 131539087 | rs232488284 | T | C | Auts2 | Reg variation | mus_musculus |  |  |  |  |
| 5 | 131539129 | rs247869344 | C | T | Auts2 | Reg variation | mus_musculus |  |  |  |  |
| 5 | 131539161 | rs264451019 | G | A | Auts2 | Reg variation | mus_musculus |  |  |  |  |
| 5 | 131539206 | rs234061197 | C | T | Auts2 | Reg variation | mus_musculus |  |  |  |  |
| 5 | 131539256 | rs226432476 | G | A | Auts2 | Reg variation | mus_musculus |  |  |  |  |
| 5 | 131539266 | rs244820243 | T | C | Auts2 | Reg variation | mus_musculus |  |  |  |  |
| 5 | 131539478 | rs217447377 | T | G | Auts2 | Reg variation | mus_musculus |  |  |  |  |
| 5 | 131539564 | rs249278977 | C | A | Auts2 | Reg variation | mus_musculus |  |  |  |  |
| 5 | 131539702 | rs225430552 | C | T | Auts2 | Reg variation | mus_musculus |  |  |  |  |
| 5 | 131539750 | rs266161567 | T | G | Auts2 | Reg variation | mus_musculus |  |  |  |  |
| 5 | 131540006 | rs230418101 | T | A | Auts2 | Reg variation | mus_musculus |  |  |  |  |
| 5 | 131540026 | rs243457949 | C | T | Auts2 | Reg variation | mus_musculus |  |  |  |  |
| 5 | 131540086 | rs232441975 | T | A | Auts2 | Reg variation | mus_musculus |  |  |  |  |
| 5 | 131540186 | rs579939560 | T | C | Auts2 | Reg variation | mus_musculus |  |  |  |  |
| 5 | 131540190 | rs583310642 | T | C | Auts2 | Reg variation | mus_musculus |  |  |  |  |
| 5 | 131540491 | rs265682643 | C | T | Auts2 | Reg variation | mus_musculus |  |  |  |  |
| 5 | 131540637 | rs224012153 | C | T | Auts2 | Reg variation | mus_musculus |  |  |  |  |
| 5 | 131541036 | rs3719791   | A | G | Auts2 | Reg variation | mus_musculus |  |  |  |  |
| 5 | 131542026 | rs251210800 | G | A | Auts2 | Reg variation | mus_musculus |  |  |  |  |
| 5 | 131574675 | rs36904249  | T | C | Auts2 | Reg variation | mus_musculus |  |  |  |  |
| 5 | 131574723 | rs38442087  | A | G | Auts2 | Reg variation | mus_musculus |  |  |  |  |
| 5 | 131576192 | rs36593699  | T | C | Auts2 | Reg variation | mus_musculus |  |  |  |  |
| 5 | 131576783 | rs222594953 | T | C | Auts2 | Reg variation | mus_musculus |  |  |  |  |
| 5 | 131576816 | rs248896721 | T | G | Auts2 | Reg variation | mus_musculus |  |  |  |  |
| 5 | 131576817 | rs263131711 | T | C | Auts2 | Reg variation | mus_musculus |  |  |  |  |
| 5 | 131576902 | rs580853578 | G | T | Auts2 | Reg variation | mus_musculus |  |  |  |  |
| 5 | 131577529 | rs223416943 | T | C | Auts2 | Reg variation | mus_musculus |  |  |  |  |
| 5 | 131577821 | rs251926887 | G | A | Auts2 | Reg variation | mus_musculus |  |  |  |  |
| 5 | 131577930 | rs36631081  | A | C | Auts2 | Reg variation | mus_musculus |  |  |  |  |
| 5 | 131578678 | rs36624340  | T | C | Auts2 | Reg variation | mus_musculus |  |  |  |  |
| 5 | 131578719 | rs235512702 | T | G | Auts2 | Reg variation | mus_musculus |  |  |  |  |
| 5 | 131578729 | rs219918153 | T | C | Auts2 | Reg variation | mus_musculus |  |  |  |  |

|   |           |                          |       |                  |              |               |              |  |  |  |  |
|---|-----------|--------------------------|-------|------------------|--------------|---------------|--------------|--|--|--|--|
| 5 | 131579513 | rs256913076              | A     | T                | <i>Auts2</i> | Reg variation | mus_musculus |  |  |  |  |
| 5 | 131579518 | rs224976667              | G     | A                | <i>Auts2</i> | Reg variation | mus_musculus |  |  |  |  |
| 5 | 131579573 | rs37928435               | A     | G                | <i>Auts2</i> | Reg variation | mus_musculus |  |  |  |  |
| 5 | 131579597 | rs37365673               | G     | A                | <i>Auts2</i> | Reg variation | mus_musculus |  |  |  |  |
| 5 | 131579828 | rs233374370              | C     | G                | <i>Auts2</i> | Reg variation | mus_musculus |  |  |  |  |
| 5 | 131580859 | rs260658374              | G     | A                | <i>Auts2</i> | Reg variation | mus_musculus |  |  |  |  |
| 5 | 131581829 | rs37178906               | G     | T                | <i>Auts2</i> | Reg variation | mus_musculus |  |  |  |  |
| 5 | 131582199 | rs240789833              | T     | G                | <i>Auts2</i> | Reg variation | mus_musculus |  |  |  |  |
| 5 | 131616638 | rs51047690               | T     | C                | <i>Auts2</i> | Reg variation | mus_musculus |  |  |  |  |
| 5 | 131616816 | rs259066714              | T     | C                | <i>Auts2</i> | Reg variation | mus_musculus |  |  |  |  |
| 5 | 131616871 | rs47409170               | T     | C                | <i>Auts2</i> | Reg variation | mus_musculus |  |  |  |  |
| 5 | 131616936 | rs579296331              | C     | T                | <i>Auts2</i> | Reg variation | mus_musculus |  |  |  |  |
| 5 | 131616940 | rs582507491              | A     | C                | <i>Auts2</i> | Reg variation | mus_musculus |  |  |  |  |
| 5 | 131617290 | rs213354971              | C     | T                | <i>Auts2</i> | Reg variation | mus_musculus |  |  |  |  |
| 5 | 131617493 | rs240629940              | C     | G                | <i>Auts2</i> | Reg variation | mus_musculus |  |  |  |  |
| 5 | 131617933 | rs219668619              | C     | T                | <i>Auts2</i> | Reg variation | mus_musculus |  |  |  |  |
| 5 | 131617970 | rs241333510              | T     | C                | <i>Auts2</i> | Reg variation | mus_musculus |  |  |  |  |
| 5 | 131618324 | rs49660331               | C     | T                | <i>Auts2</i> | Reg variation | mus_musculus |  |  |  |  |
| 5 | 131618382 | rs49919833               | C     | T                | <i>Auts2</i> | Reg variation | mus_musculus |  |  |  |  |
| 5 | 131618469 | rs215577033              | G     | A                | <i>Auts2</i> | Reg variation | mus_musculus |  |  |  |  |
| 5 | 131618530 | rs221422091              | T     | G                | <i>Auts2</i> | Reg variation | mus_musculus |  |  |  |  |
| 5 | 131618537 | rs234943012              | A     | T                | <i>Auts2</i> | Reg variation | mus_musculus |  |  |  |  |
| 5 | 131619348 | rs239000078              | A     | G                | <i>Auts2</i> | Reg variation | mus_musculus |  |  |  |  |
| 5 | 131619498 | rs249544572              | A     | C                | <i>Auts2</i> | Reg variation | mus_musculus |  |  |  |  |
| 5 | 131619502 | rs213744572              | A     | C                | <i>Auts2</i> | Reg variation | mus_musculus |  |  |  |  |
| 5 | 131619930 | rs266085270              | G     | A                | <i>Auts2</i> | Reg variation | mus_musculus |  |  |  |  |
| 5 | 131620431 | rs49217244               | T     | C                | <i>Auts2</i> | Reg variation | mus_musculus |  |  |  |  |
| 5 | 131620523 | rs48735047               | T     | C                | <i>Auts2</i> | Reg variation | mus_musculus |  |  |  |  |
| 5 | 131620628 | rs49890003               | G     | A                | <i>Auts2</i> | Reg variation | mus_musculus |  |  |  |  |
| 5 | 131620702 | rs255329329              | A     | G                | <i>Auts2</i> | Reg variation | mus_musculus |  |  |  |  |
| 5 | 131620780 | rs253326146              | G     | A                | <i>Auts2</i> | Reg variation | mus_musculus |  |  |  |  |
| 5 | 131621259 | rs45646645               | A     | G                | <i>Auts2</i> | Reg variation | mus_musculus |  |  |  |  |
| 5 | 131763957 | rs235051650              | C     | A                | <i>Auts2</i> | Reg variation | mus_musculus |  |  |  |  |
| 5 | 131764474 | rs238335713              | C     | T                | <i>Auts2</i> | Reg variation | mus_musculus |  |  |  |  |
| 5 | 132028176 |                          | T     | A                | <i>Auts2</i> | Reg variation | mus_musculus |  |  |  |  |
| 5 | 132028178 | rs585650466              | T     | A                | <i>Auts2</i> | Reg variation | mus_musculus |  |  |  |  |
| 5 | 132029879 | rs13478535               | T     | C                | <i>Auts2</i> | Reg variation | mus_musculus |  |  |  |  |
| 5 | 132030379 | rs47345882               | G     | T                | <i>Auts2</i> | Reg variation | mus_musculus |  |  |  |  |
| 5 | 132030650 | rs33547746               | T     | C                | <i>Auts2</i> | Reg variation | mus_musculus |  |  |  |  |
| 5 | 132030677 | rs33056915               | A     | G                | <i>Auts2</i> | Reg variation | mus_musculus |  |  |  |  |
| 5 | 132052936 | rs51344409               | T     | C                | <i>Auts2</i> | Reg variation | mus_musculus |  |  |  |  |
| 5 | 132541716 |                          | A     | C                | <i>Auts2</i> | Reg variation | mus_musculus |  |  |  |  |
| 5 | 131438015 | rs229062311              | AACAC | A                | <i>Auts2</i> | UTR variation | mus_musculus |  |  |  |  |
| 5 | 131439376 | rs226419934; rs214003274 | T     | TG               | <i>Auts2</i> | UTR variation | mus_musculus |  |  |  |  |
| 5 | 131476702 | rs217962247              | A     | AG               | <i>Auts2</i> | UTR variation | mus_musculus |  |  |  |  |
| 5 | 131538229 | rs222895439              | GGGA  | G                | <i>Auts2</i> | UTR variation | mus_musculus |  |  |  |  |
| 5 | 131616015 |                          | A     | AAGGCTGTAAGTCCGG | <i>Auts2</i> | UTR variation | mus_musculus |  |  |  |  |
| 5 | 131616305 | rs264903870              | T     | TACC             | <i>Auts2</i> | UTR variation | mus_musculus |  |  |  |  |
| 5 | 131475113 | rs261100010              | C     | T                | <i>Auts2</i> | UTR variation | mus_musculus |  |  |  |  |
| 5 | 131616286 | rs46277149               | G     | A                | <i>Auts2</i> | UTR variation | mus_musculus |  |  |  |  |
| 5 | 149047419 |                          | C     | CAA              | <i>Hmgb1</i> | Reg variation | mus_musculus |  |  |  |  |
| 5 | 149052017 | rs228105048              | CG    | C                | <i>Hmgb1</i> | Reg variation | mus_musculus |  |  |  |  |
| 5 | 149053391 |                          | TC    | T                | <i>Hmgb1</i> | Reg variation | mus_musculus |  |  |  |  |
| 5 | 149053677 |                          | TC    | T                | <i>Hmgb1</i> | Reg variation | mus_musculus |  |  |  |  |

|   |           |             |    |                  |               |                                    |              |       |         |    |    |
|---|-----------|-------------|----|------------------|---------------|------------------------------------|--------------|-------|---------|----|----|
| 5 | 149157777 | rs241199186 | GT | G                | <i>Hmgb1</i>  | Reg variation                      | mus_musculus |       |         |    |    |
| 5 | 149159057 | rs251888705 | A  | AT               | <i>Hmgb1</i>  | Reg variation                      | mus_musculus |       |         |    |    |
| 5 | 149048187 | rs264217661 | T  | C                | <i>Hmgb1</i>  | Reg variation                      | mus_musculus |       |         |    |    |
| 5 | 149051533 | .           | G  | T                | <i>Hmgb1</i>  | Reg variation                      | mus_musculus |       |         |    |    |
| 5 | 149115706 | .           | T  | C                | <i>Hmgb1</i>  | Reg variation                      | mus_musculus |       |         |    |    |
| 5 | 149115717 | rs585378288 | A  | C                | <i>Hmgb1</i>  | Reg variation                      | mus_musculus |       |         |    |    |
| 5 | 149183069 | .           | T  | C                | <i>Hmgb1</i>  | Reg variation                      | mus_musculus |       |         |    |    |
| 5 | 149183085 | .           | A  | C                | <i>Hmgb1</i>  | Reg variation                      | mus_musculus |       |         |    |    |
| 5 | 149047419 | .           | C  | CAA              | <i>Hmgb1</i>  | UTR variation                      | mus_musculus |       |         |    |    |
| 5 | 149053391 | .           | TC | T                | <i>Hmgb1</i>  | UTR variation                      | mus_musculus |       |         |    |    |
| 5 | 149048187 | rs264217661 | T  | C                | <i>Hmgb1</i>  | UTR variation                      | mus_musculus |       |         |    |    |
| 5 | 149051533 | .           | G  | T                | <i>Hmgb1</i>  | UTR variation                      | mus_musculus |       |         |    |    |
| 5 | 114953366 | rs33234601  | G  | A                | <i>Hnf1a</i>  | missense_variant                   | mus_musculus | -0.94 | Neutral | NA | NA |
| 5 | 114954423 | rs216313367 | G  | GGGC             | <i>Hnf1a</i>  | Reg variation                      | mus_musculus |       |         |    |    |
| 5 | 114966880 | rs246580903 | A  | ATG              | <i>Hnf1a</i>  | Reg variation                      | mus_musculus |       |         |    |    |
| 5 | 114966958 | rs260249790 | A  | ATG              | <i>Hnf1a</i>  | Reg variation                      | mus_musculus |       |         |    |    |
| 5 | 114971246 | rs256813990 | AG | A                | <i>Hnf1a</i>  | Reg variation                      | mus_musculus |       |         |    |    |
| 5 | 114971815 | rs213504199 | T  | TTTTTG           | <i>Hnf1a</i>  | Reg variation                      | mus_musculus |       |         |    |    |
| 5 | 114973053 | rs231803031 | A  | AAAAACAAAACAAAAC | <i>Hnf1a</i>  | Reg variation                      | mus_musculus |       |         |    |    |
| 5 | 114953346 | rs33758643  | G  | A                | <i>Hnf1a</i>  | Reg variation                      | mus_musculus |       |         |    |    |
| 5 | 114953366 | rs33234601  | G  | A                | <i>Hnf1a</i>  | Reg variation                      | mus_musculus |       |         |    |    |
| 5 | 114953560 | rs33562811  | T  | A                | <i>Hnf1a</i>  | Reg variation                      | mus_musculus |       |         |    |    |
| 5 | 114953608 | rs33600326  | T  | C                | <i>Hnf1a</i>  | Reg variation                      | mus_musculus |       |         |    |    |
| 5 | 114953938 | rs33142674  | T  | C                | <i>Hnf1a</i>  | Reg variation                      | mus_musculus |       |         |    |    |
| 5 | 114954197 | rs33239383  | T  | C                | <i>Hnf1a</i>  | Reg variation                      | mus_musculus |       |         |    |    |
| 5 | 114954575 | rs29726493  | A  | G                | <i>Hnf1a</i>  | Reg variation                      | mus_musculus |       |         |    |    |
| 5 | 114963956 | rs33494420  | T  | C                | <i>Hnf1a</i>  | Reg variation                      | mus_musculus |       |         |    |    |
| 5 | 114964091 | rs33041382  | A  | T                | <i>Hnf1a</i>  | Reg variation                      | mus_musculus |       |         |    |    |
| 5 | 114964185 | rs33138998  | G  | A                | <i>Hnf1a</i>  | Reg variation                      | mus_musculus |       |         |    |    |
| 5 | 114964405 | rs33588757  | A  | G                | <i>Hnf1a</i>  | Reg variation                      | mus_musculus |       |         |    |    |
| 5 | 114964530 | rs33523106  | A  | G                | <i>Hnf1a</i>  | Reg variation                      | mus_musculus |       |         |    |    |
| 5 | 114965176 | rs33188910  | T  | C                | <i>Hnf1a</i>  | Reg variation                      | mus_musculus |       |         |    |    |
| 5 | 114965643 | rs52502995  | A  | C                | <i>Hnf1a</i>  | Reg variation                      | mus_musculus |       |         |    |    |
| 5 | 114966122 | rs33292304  | G  | A                | <i>Hnf1a</i>  | Reg variation                      | mus_musculus |       |         |    |    |
| 5 | 114966124 | rs33602662  | C  | T                | <i>Hnf1a</i>  | Reg variation                      | mus_musculus |       |         |    |    |
| 5 | 114966318 | rs29569396  | G  | A                | <i>Hnf1a</i>  | Reg variation                      | mus_musculus |       |         |    |    |
| 5 | 114966830 | rs33342430  | A  | G                | <i>Hnf1a</i>  | Reg variation                      | mus_musculus |       |         |    |    |
| 5 | 114967327 | rs29729491  | A  | G                | <i>Hnf1a</i>  | Reg variation                      | mus_musculus |       |         |    |    |
| 5 | 114967380 | rs33548050  | C  | A                | <i>Hnf1a</i>  | Reg variation                      | mus_musculus |       |         |    |    |
| 5 | 114967639 | rs29810472  | G  | A                | <i>Hnf1a</i>  | Reg variation                      | mus_musculus |       |         |    |    |
| 5 | 114968081 | rs33312283  | A  | G                | <i>Hnf1a</i>  | Reg variation                      | mus_musculus |       |         |    |    |
| 5 | 114968111 | rs49654616  | T  | C                | <i>Hnf1a</i>  | Reg variation                      | mus_musculus |       |         |    |    |
| 5 | 114968462 | rs32142209  | G  | A                | <i>Hnf1a</i>  | Reg variation                      | mus_musculus |       |         |    |    |
| 5 | 114972126 | rs33148223  | A  | C                | <i>Hnf1a</i>  | Reg variation                      | mus_musculus |       |         |    |    |
| 5 | 114972310 | rs29545196  | T  | C                | <i>Hnf1a</i>  | Reg variation                      | mus_musculus |       |         |    |    |
| 5 | 114972372 | rs32143102  | A  | G                | <i>Hnf1a</i>  | Reg variation                      | mus_musculus |       |         |    |    |
| 5 | 114953346 | rs33758643  | G  | A                | <i>Hnf1a</i>  | UTR variation                      | mus_musculus |       |         |    |    |
| 5 | 114953366 | rs33234601  | G  | A                | <i>Hnf1a</i>  | UTR variation                      | mus_musculus |       |         |    |    |
| 5 | 114955488 | rs13478474  | C  | T                | <i>Hnf1a</i>  | UTR variation                      | mus_musculus |       |         |    |    |
| 5 | 114955941 | rs48137218  | A  | G                | <i>Hnf1a</i>  | UTR variation                      | mus_musculus |       |         |    |    |
| 5 | 123317219 | rs200525873 | GT | G, GTT           | <i>CEP120</i> |                                    | homo sapiens |       |         |    |    |
| 5 | 123346640 | rs2303720   | C  | A, T             | <i>CEP120</i> | missense_variant                   | homo sapiens | --    | --      | -- | -- |
| 5 | 123346640 | rs2303720   | C  | A, T             | <i>CEP120</i> | non_coding_transcript_exon_variant | homo sapiens |       |         |    |    |
| 5 | 123346640 | rs2303720   | C  | A, T             | <i>CEP120</i> | 3_prime_UTR_variant                | homo sapiens |       |         |    |    |

|   |           |                          |        |      |               |                                    |              |    |    |    |    |
|---|-----------|--------------------------|--------|------|---------------|------------------------------------|--------------|----|----|----|----|
| 5 | 123346640 | rs2303720                | C      | A, T | <i>CEP120</i> | NMD_transcript_variant             | homo sapiens |    |    |    |    |
| 5 | 123315191 | rs144052331              | T      | C    | <i>CEP120</i> |                                    | homo sapiens |    |    |    |    |
| 5 | 50657625  | rs16884025               | C      | T    | <i>EMB</i>    |                                    | homo sapiens |    |    |    |    |
| 5 | 50441389  | rs72751723               | G      | T    | <i>EMB</i>    | non_coding_transcript_variant      | homo sapiens |    |    |    |    |
| 5 | 50441389  | rs72751723               | G      | T    | <i>EMB</i>    | intron_variant                     | homo sapiens |    |    |    |    |
| 5 | 50441389  | rs72751723               | G      | T    | <i>EMB</i>    | upstream_gene_variant              | homo sapiens |    |    |    |    |
| 5 | 50927276  | rs202178099              | A      | C    | <i>EMB</i>    |                                    | homo sapiens |    |    |    |    |
| 5 | 177252406 | rs4343858                | G      | A    | <i>NSD1</i>   | non_coding_transcript_variant      | homo sapiens |    |    |    |    |
| 5 | 177252406 | rs4343858                | G      | A    | <i>NSD1</i>   | intron_variant                     | homo sapiens |    |    |    |    |
| 5 | 177105216 | rs193457                 | C      | G    | <i>NSD1</i>   |                                    | homo sapiens |    |    |    |    |
| 5 | 102764872 | rs7729395                | C      | T    | <i>PAM</i>    | non_coding_transcript_variant      | homo sapiens |    |    |    |    |
| 5 | 103003107 | rs35658696               | A      | G    | <i>PAM</i>    | 3_prime_UTR_variant                | homo sapiens |    |    |    |    |
| 5 | 102764872 | rs7729395                | C      | T    | <i>PAM</i>    | intron_variant                     | homo sapiens |    |    |    |    |
| 5 | 103003107 | rs35658696               | A      | G    | <i>PAM</i>    | missense_variant                   | homo sapiens | -- | -- | -- | -- |
| 5 | 103003107 | rs35658696               | A      | G    | <i>PAM</i>    | non_coding_transcript_exon_variant | homo sapiens |    |    |    |    |
| 5 | 103003107 | rs35658696               | A      | G    | <i>PAM</i>    | upstream_gene_variant              | homo sapiens |    |    |    |    |
| 5 | 103003035 | rs78408340               | C      | G, T | <i>PAM</i>    | missense_variant                   | homo sapiens | -- | -- | -- | -- |
| 5 | 103250706 | rs75432112               | G      | A    | <i>PAM</i>    |                                    | homo sapiens |    |    |    |    |
| 5 | 103003035 | rs78408340               | C      | G, T | <i>PAM</i>    | non_coding_transcript_exon_variant | homo sapiens |    |    |    |    |
| 5 | 102764872 | rs7729395                | C      | T    | <i>PAM</i>    | NMD_transcript_variant             | homo sapiens |    |    |    |    |
| 5 | 103087264 | rs115505614              | C      | T    | <i>PAM</i>    | downstream_gene_variant            | homo sapiens |    |    |    |    |
| 5 | 103003035 | rs78408340               | C      | G, T | <i>PAM</i>    | 3_prime_UTR_variant                | homo sapiens |    |    |    |    |
| 5 | 102912212 | rs72783884               | A      | T    | <i>PAM</i>    | non_coding_transcript_variant      | homo sapiens |    |    |    |    |
| 5 | 103003035 | rs78408340               | C      | G, T | <i>PAM</i>    | upstream_gene_variant              | homo sapiens |    |    |    |    |
| 5 | 103003107 | rs35658696               | A      | G    | <i>PAM</i>    | NMD_transcript_variant             | homo sapiens |    |    |    |    |
| 5 | 103003035 | rs78408340               | C      | G, T | <i>PAM</i>    | splice_region_variant              | homo sapiens |    |    |    |    |
| 5 | 103003035 | rs78408340               | C      | G, T | <i>PAM</i>    | NMD_transcript_variant             | homo sapiens |    |    |    |    |
| 5 | 103087264 | rs115505614              | C      | T    | <i>PAM</i>    | 3_prime_UTR_variant                | homo sapiens |    |    |    |    |
| 5 | 102912212 | rs72783884               | A      | T    | <i>PAM</i>    | NMD_transcript_variant             | homo sapiens |    |    |    |    |
| 5 | 103087264 | rs115505614              | C      | T    | <i>PAM</i>    | NMD_transcript_variant             | homo sapiens |    |    |    |    |
| 5 | 102912212 | rs72783884               | A      | T    | <i>PAM</i>    | intron_variant                     | homo sapiens |    |    |    |    |
| 5 | 96514546  | rs261967                 | A      | C    | <i>PCSK1</i>  |                                    | homo sapiens |    |    |    |    |
| 5 | 96512799  | rs6556925                | C      | A    | <i>PCSK1</i>  |                                    | homo sapiens |    |    |    |    |
| 5 | 75707853  | rs2307111                | T      | A, C | <i>POC5</i>   | missense_variant                   | homo sapiens | -- | -- | -- | -- |
| 5 | 75707853  | rs2307111                | T      | A, C | <i>POC5</i>   | NMD_transcript_variant             | homo sapiens |    |    |    |    |
| 5 | 75707853  | rs2307111                | T      | A, C | <i>POC5</i>   | non_coding_transcript_exon_variant | homo sapiens |    |    |    |    |
| 5 | 75707853  | rs2307111                | T      | A, C | <i>POC5</i>   | intron_variant                     | homo sapiens |    |    |    |    |
| 5 | 75707853  | rs2307111                | T      | A, C | <i>POC5</i>   | downstream_gene_variant            | homo sapiens |    |    |    |    |
| 5 | 75707853  | rs2307111                | T      | A, C | <i>POC5</i>   | 5_prime_UTR_variant                | homo sapiens |    |    |    |    |
| 6 | 127125291 | rs244295333              | TTG    | T    | <i>Ccnd2</i>  | Reg variation                      | mus_musculus |    |    |    |    |
| 6 | 127125742 | rs216420762              | GTTTTT | G    | <i>Ccnd2</i>  | Reg variation                      | mus_musculus |    |    |    |    |
| 6 | 127125767 | rs230186144              | G      | GT   | <i>Ccnd2</i>  | Reg variation                      | mus_musculus |    |    |    |    |
| 6 | 127144691 | rs242221539; rs228031608 | G      | GAC  | <i>Ccnd2</i>  | Reg variation                      | mus_musculus |    |    |    |    |
| 6 | 127147118 | rs229489042              | TG     | T    | <i>Ccnd2</i>  | Reg variation                      | mus_musculus |    |    |    |    |
| 6 | 127147129 |                          | GT     | G    | <i>Ccnd2</i>  | Reg variation                      | mus_musculus |    |    |    |    |
| 6 | 127147608 | rs256949852; rs244513104 | T      | TA   | <i>Ccnd2</i>  | Reg variation                      | mus_musculus |    |    |    |    |
| 6 | 127148458 | rs237484024; rs221850626 | GC     | G    | <i>Ccnd2</i>  | Reg variation                      | mus_musculus |    |    |    |    |
| 6 | 127148575 | rs263458652; rs234563996 | C      | CT   | <i>Ccnd2</i>  | Reg variation                      | mus_musculus |    |    |    |    |
| 6 | 127125293 | rs13460486               | G      | T    | <i>Ccnd2</i>  | Reg variation                      | mus_musculus |    |    |    |    |
| 6 | 127152052 | rs30166586               | T      | G    | <i>Ccnd2</i>  | Reg variation                      | mus_musculus |    |    |    |    |
| 6 | 127153323 | rs243173282              | T      | G    | <i>Ccnd2</i>  | Reg variation                      | mus_musculus |    |    |    |    |
| 6 | 127128775 | rs387809680; rs229463529 | AC     | A    | <i>Ccnd2</i>  | UTR variation                      | mus_musculus |    |    |    |    |
| 6 | 127128841 | rs233921470              | CA     | C    | <i>Ccnd2</i>  | UTR variation                      | mus_musculus |    |    |    |    |
| 6 | 127128959 | rs224323564              | TACAA  | T    | <i>Ccnd2</i>  | UTR variation                      | mus_musculus |    |    |    |    |

|   |           |                          |      |          |         |                       |              |       |         |       |          |
|---|-----------|--------------------------|------|----------|---------|-----------------------|--------------|-------|---------|-------|----------|
| 6 | 127129426 | rs252149097              | CT   | C        | Ccnd2   | UTR variation         | mus_musculus |       |         |       |          |
| 6 | 127130215 | rs211817584              | GTTT | G        | Ccnd2   | UTR variation         | mus_musculus |       |         |       |          |
| 6 | 127150839 | rs220059515              | CG   | C        | Ccnd2   | UTR variation         | mus_musculus |       |         |       |          |
| 6 | 127125956 | rs30350545               | T    | G        | Ccnd2   | UTR variation         | mus_musculus |       |         |       |          |
| 6 | 127126002 | rs30315797               | A    | G        | Ccnd2   | UTR variation         | mus_musculus |       |         |       |          |
| 6 | 127126012 | rs30279006               | A    | G        | Ccnd2   | UTR variation         | mus_musculus |       |         |       |          |
| 6 | 127126034 | rs30767545               | T    | C        | Ccnd2   | UTR variation         | mus_musculus |       |         |       |          |
| 6 | 127128476 | rs51306312               | G    | A        | Ccnd2   | UTR variation         | mus_musculus |       |         |       |          |
| 6 | 127128776 |                          | C    | A        | Ccnd2   | UTR variation         | mus_musculus |       |         |       |          |
| 6 | 127129421 | rs30560456               | A    | G        | Ccnd2   | UTR variation         | mus_musculus |       |         |       |          |
| 6 | 127129451 | rs30368181               | G    | A        | Ccnd2   | UTR variation         | mus_musculus |       |         |       |          |
| 6 | 127129812 | rs13461860               | T    | C        | Ccnd2   | UTR variation         | mus_musculus |       |         |       |          |
| 6 | 127151043 | rs52360075               | C    | G        | Ccnd2   | UTR variation         | mus_musculus |       |         |       |          |
| 6 | 115994766 | rs251020982              | G    | A        | Plxnd1  | missense_variant      | mus_musculus | -0.29 | Neutral | 0.032 | Damaging |
| 6 | 115955078 | rs257930517              | T    | TAAAAAAC | Plxnd1  | Reg variation         | mus_musculus |       |         |       |          |
| 6 | 115955183 | rs232942209              | AC   | A        | Plxnd1  | Reg variation         | mus_musculus |       |         |       |          |
| 6 | 115962291 | rs217268058              | TG   | T        | Plxnd1  | Reg variation         | mus_musculus |       |         |       |          |
| 6 | 115963099 | rs238381466              | CG   | C        | Plxnd1  | Reg variation         | mus_musculus |       |         |       |          |
| 6 | 115965575 | rs257712837              | GC   | G        | Plxnd1  | Reg variation         | mus_musculus |       |         |       |          |
| 6 | 115965595 | rs233678035              | AG   | A        | Plxnd1  | Reg variation         | mus_musculus |       |         |       |          |
| 6 | 115970525 | rs243752875              | TC   | T        | Plxnd1  | Reg variation         | mus_musculus |       |         |       |          |
| 6 | 115953378 | rs248804270; rs223974456 | CTT  | C        | Plxnd1  | Reg variation         | mus_musculus |       |         |       |          |
| 6 | 115955084 | rs30951417               | T    | A        | Plxnd1  | Reg variation         | mus_musculus |       |         |       |          |
| 6 | 115957149 | rs30461143               | A    | G        | Plxnd1  | Reg variation         | mus_musculus |       |         |       |          |
| 6 | 115957274 | rs46788763               | C    | A        | Plxnd1  | Reg variation         | mus_musculus |       |         |       |          |
| 6 | 115957521 | rs30979855               | T    | C        | Plxnd1  | Reg variation         | mus_musculus |       |         |       |          |
| 6 | 115959391 | rs3713749                | G    | A        | Plxnd1  | Reg variation         | mus_musculus |       |         |       |          |
| 6 | 115959682 | rs30223990               | A    | C        | Plxnd1  | Reg variation         | mus_musculus |       |         |       |          |
| 6 | 115960137 | rs30816334               | C    | T        | Plxnd1  | Reg variation         | mus_musculus |       |         |       |          |
| 6 | 115960246 | rs30319051               | C    | T        | Plxnd1  | Reg variation         | mus_musculus |       |         |       |          |
| 6 | 115961967 | rs232687611              | A    | G        | Plxnd1  | Reg variation         | mus_musculus |       |         |       |          |
| 6 | 115962125 | rs257733652              | C    | T        | Plxnd1  | Reg variation         | mus_musculus |       |         |       |          |
| 6 | 115962127 | rs215293364              | G    | C        | Plxnd1  | Reg variation         | mus_musculus |       |         |       |          |
| 6 | 115963619 | rs30464416               | C    | A        | Plxnd1  | Reg variation         | mus_musculus |       |         |       |          |
| 6 | 115966101 | rs3655063                | A    | T        | Plxnd1  | Reg variation         | mus_musculus |       |         |       |          |
| 6 | 115966184 | rs3655649                | T    | A        | Plxnd1  | Reg variation         | mus_musculus |       |         |       |          |
| 6 | 115966188 | rs3655654                | G    | A        | Plxnd1  | Reg variation         | mus_musculus |       |         |       |          |
| 6 | 115966569 | rs31513779               | T    | C        | Plxnd1  | Reg variation         | mus_musculus |       |         |       |          |
| 6 | 115969607 | rs48921060               | A    | G        | Plxnd1  | Reg variation         | mus_musculus |       |         |       |          |
| 6 | 115970049 | rs30509107               | G    | A        | Plxnd1  | Reg variation         | mus_musculus |       |         |       |          |
| 6 | 115970491 | rs30119363               | C    | T        | Plxnd1  | Reg variation         | mus_musculus |       |         |       |          |
| 6 | 115974106 | rs31516633               | G    | A        | Plxnd1  | Reg variation         | mus_musculus |       |         |       |          |
| 6 | 115995120 | rs247517103              | T    | C        | Plxnd1  | Reg variation         | mus_musculus |       |         |       |          |
| 6 | 115995127 | rs262682334              | G    | A        | Plxnd1  | Reg variation         | mus_musculus |       |         |       |          |
| 6 | 115995274 | rs225612237              | T    | G        | Plxnd1  | Reg variation         | mus_musculus |       |         |       |          |
| 6 | 115995481 | rs237912049              | G    | A        | Plxnd1  | Reg variation         | mus_musculus |       |         |       |          |
| 6 | 115995630 | rs255928052              | A    | G        | Plxnd1  | Reg variation         | mus_musculus |       |         |       |          |
| 6 | 115996190 | rs30613097               | C    | T        | Plxnd1  | Reg variation         | mus_musculus |       |         |       |          |
| 6 | 115996892 | rs30173501               | T    | G        | Plxnd1  | Reg variation         | mus_musculus |       |         |       |          |
| 6 | 115955078 | rs257930517              | T    | TAAAAAAC | Plxnd1  | UTR variation         | mus_musculus |       |         |       |          |
| 6 | 115955183 | rs232942209              | AC   | A        | Plxnd1  | UTR variation         | mus_musculus |       |         |       |          |
| 6 | 115955084 | rs30951417               | T    | A        | Plxnd1  | UTR variation         | mus_musculus |       |         |       |          |
| 6 | 115994896 | rs227741254              | G    | C        | Plxnd1  | UTR variation         | mus_musculus |       |         |       |          |
| 6 | 36943498  | rs72846863               | G    | A, C     | C6orf89 | upstream_gene_variant | homo sapiens |       |         |       |          |

|   |           |                          |                 |         |        |                         |              |    |    |    |    |
|---|-----------|--------------------------|-----------------|---------|--------|-------------------------|--------------|----|----|----|----|
| 6 | 39048860  | rs10305420               | C               | T       | GLP1R  | missense_variant        | homo sapiens | -- | -- | -- | -- |
| 6 | 39069886  | rs9380826                | G               | C       | GLP1R  | intron_variant          | homo sapiens |    |    |    |    |
| 6 | 39078868  | rs742762                 | A               | C, G    | GLP1R  | intron_variant          | homo sapiens |    |    |    |    |
| 6 | 39314595  | rs34247110               | G               | A       | KCNK16 | upstream_gene_variant   | homo sapiens |    |    |    |    |
| 6 | 39316274  | rs1535500                | G               | T       | KCNK16 | missense_variant        | homo sapiens | -- | -- | -- | -- |
| 6 | 39316274  | rs1535500                | G               | T       | KCNK16 | intron_variant          | homo sapiens |    |    |    |    |
| 6 | 39314595  | rs34247110               | G               | A       | KCNK16 | downstream_gene_variant | homo sapiens |    |    |    |    |
| 6 | 39316274  | rs1535500                | G               | T       | KCNK16 | upstream_gene_variant   | homo sapiens |    |    |    |    |
| 6 | 39071364  | rs9394574                | A               | G       | KCNK16 | intron_variant          | homo sapiens |    |    |    |    |
| 6 | 43792590  | rs11967262               | C               | G       | VEGFA  |                         | homo sapiens |    |    |    |    |
| 6 | 43844025  | rs9472138                | C               | T       | VEGFA  |                         | homo sapiens |    |    |    |    |
| 6 | 43846453  | rs6458354                | C               | T       | VEGFA  |                         | homo sapiens |    |    |    |    |
| 6 | 43843237  | rs9369425                | G               | A       | VEGFA  |                         | homo sapiens |    |    |    |    |
| 6 | 43837071  | rs2396083                | G               | A, C, T | VEGFA  |                         | homo sapiens |    |    |    |    |
| 7 | 46180366  | rs8255262                | C               | CT      | Abcc8  | Reg variation           | mus_musculus |    |    |    |    |
| 7 | 46180233  | rs31603841               | T               | A       | Abcc8  | Reg variation           | mus_musculus |    |    |    |    |
| 7 | 46180283  | rs31211146               | A               | G       | Abcc8  | Reg variation           | mus_musculus |    |    |    |    |
| 7 | 46180424  | rs8255263                | T               | C       | Abcc8  | Reg variation           | mus_musculus |    |    |    |    |
| 7 | 46180539  | rs8255264                | T               | G       | Abcc8  | Reg variation           | mus_musculus |    |    |    |    |
| 7 | 46180657  | rs31690580               | C               | A       | Abcc8  | Reg variation           | mus_musculus |    |    |    |    |
| 7 | 46180734  | rs8255259                | G               | A       | Abcc8  | Reg variation           | mus_musculus |    |    |    |    |
| 7 | 46180783  | rs8255260                | G               | A       | Abcc8  | Reg variation           | mus_musculus |    |    |    |    |
| 7 | 46180825  | rs8255261                | G               | C       | Abcc8  | Reg variation           | mus_musculus |    |    |    |    |
| 7 | 46181076  | .                        | G               | A       | Abcc8  | Reg variation           | mus_musculus |    |    |    |    |
| 7 | 46181077  | rs578786007              | A               | G       | Abcc8  | Reg variation           | mus_musculus |    |    |    |    |
| 7 | 46181307  | .                        | G               | A       | Abcc8  | Reg variation           | mus_musculus |    |    |    |    |
| 7 | 46181568  | rs49421995               | T               | C       | Abcc8  | Reg variation           | mus_musculus |    |    |    |    |
| 7 | 46181603  | rs243510447              | A               | C       | Abcc8  | Reg variation           | mus_musculus |    |    |    |    |
| 7 | 46180031  | .                        | G               | GCCCGC  | Abcc8  | UTR variation           | mus_musculus |    |    |    |    |
| 7 | 46179965  | rs32183325               | G               | A       | Abcc8  | UTR variation           | mus_musculus |    |    |    |    |
| 7 | 144929967 | rs261930887              | CT              | C       | Ccnd1  | Reg variation           | mus_musculus |    |    |    |    |
| 7 | 144930680 | rs220901077; rs231566496 | T               | TA      | Ccnd1  | Reg variation           | mus_musculus |    |    |    |    |
| 7 | 144931146 | rs244168286              | ATC             | A       | Ccnd1  | Reg variation           | mus_musculus |    |    |    |    |
| 7 | 144931177 | .                        | GACC            | GC, G   | Ccnd1  | Reg variation           | mus_musculus |    |    |    |    |
| 7 | 144932208 | rs222230778              | C               | CT      | Ccnd1  | Reg variation           | mus_musculus |    |    |    |    |
| 7 | 144932382 | rs260217983; rs215788702 | A               | ATC     | Ccnd1  | Reg variation           | mus_musculus |    |    |    |    |
| 7 | 144935496 | rs260612844              | AACATCTGTGTCCTC | A       | Ccnd1  | Reg variation           | mus_musculus |    |    |    |    |
| 7 | 144935687 | rs248374286              | T               | TGGG    | Ccnd1  | Reg variation           | mus_musculus |    |    |    |    |
| 7 | 144936805 | rs218771668              | C               | CCAGG   | Ccnd1  | Reg variation           | mus_musculus |    |    |    |    |
| 7 | 144936854 | rs256668749              | C               | CT      | Ccnd1  | Reg variation           | mus_musculus |    |    |    |    |
| 7 | 144936964 | rs242827721; rs217333312 | GGTGT           | G       | Ccnd1  | Reg variation           | mus_musculus |    |    |    |    |
| 7 | 144938614 | rs258773625              | C               | CG      | Ccnd1  | Reg variation           | mus_musculus |    |    |    |    |
| 7 | 144939979 | .                        | A               | AT      | Ccnd1  | Reg variation           | mus_musculus |    |    |    |    |
| 7 | 144940584 | rs228943590              | TG              | T       | Ccnd1  | Reg variation           | mus_musculus |    |    |    |    |
| 7 | 144940879 | rs251476928              | GGGA            | G       | Ccnd1  | Reg variation           | mus_musculus |    |    |    |    |
| 7 | 144930069 | rs8258594                | C               | T       | Ccnd1  | Reg variation           | mus_musculus |    |    |    |    |
| 7 | 144930161 | rs8258595                | T               | C       | Ccnd1  | Reg variation           | mus_musculus |    |    |    |    |
| 7 | 144930387 | rs48083722               | C               | T       | Ccnd1  | Reg variation           | mus_musculus |    |    |    |    |
| 7 | 144930431 | rs38195432               | A               | T       | Ccnd1  | Reg variation           | mus_musculus |    |    |    |    |
| 7 | 144930761 | rs49774158               | T               | C       | Ccnd1  | Reg variation           | mus_musculus |    |    |    |    |
| 7 | 144930847 | rs38006732               | T               | C       | Ccnd1  | Reg variation           | mus_musculus |    |    |    |    |
| 7 | 144930965 | rs51407800               | C               | T       | Ccnd1  | Reg variation           | mus_musculus |    |    |    |    |
| 7 | 144931205 | rs51417353               | G               | A       | Ccnd1  | Reg variation           | mus_musculus |    |    |    |    |
| 7 | 144931889 | rs13469483               | T               | C       | Ccnd1  | Reg variation           | mus_musculus |    |    |    |    |

|   |           |                          |      |       |              |                  |              |       |         |       |           |
|---|-----------|--------------------------|------|-------|--------------|------------------|--------------|-------|---------|-------|-----------|
| 7 | 144932217 | rs227698015              | A    | T     | <i>Ccnd1</i> | Reg variation    | mus_musculus |       |         |       |           |
| 7 | 144932900 | rs8244032                | A    | G     | <i>Ccnd1</i> | Reg variation    | mus_musculus |       |         |       |           |
| 7 | 144933402 | rs8244033                | C    | T     | <i>Ccnd1</i> | Reg variation    | mus_musculus |       |         |       |           |
| 7 | 144933564 | rs8244034                | C    | T     | <i>Ccnd1</i> | Reg variation    | mus_musculus |       |         |       |           |
| 7 | 144933591 | rs8244035                | G    | A     | <i>Ccnd1</i> | Reg variation    | mus_musculus |       |         |       |           |
| 7 | 144933893 | rs8244036                | A    | G     | <i>Ccnd1</i> | Reg variation    | mus_musculus |       |         |       |           |
| 7 | 144934205 | rs8244038                | T    | C     | <i>Ccnd1</i> | Reg variation    | mus_musculus |       |         |       |           |
| 7 | 144934224 | rs8244040                | C    | T     | <i>Ccnd1</i> | Reg variation    | mus_musculus |       |         |       |           |
| 7 | 144935293 | rs31475124               | G    | T     | <i>Ccnd1</i> | Reg variation    | mus_musculus |       |         |       |           |
| 7 | 144935546 | rs36727900               | C    | T     | <i>Ccnd1</i> | Reg variation    | mus_musculus |       |         |       |           |
| 7 | 144935612 | rs108894446              | T    | C     | <i>Ccnd1</i> | Reg variation    | mus_musculus |       |         |       |           |
| 7 | 144935781 | rs38840666               | C    | T     | <i>Ccnd1</i> | Reg variation    | mus_musculus |       |         |       |           |
| 7 | 144935818 | rs31272899               | T    | C     | <i>Ccnd1</i> | Reg variation    | mus_musculus |       |         |       |           |
| 7 | 144935835 | rs32171886               | T    | C     | <i>Ccnd1</i> | Reg variation    | mus_musculus |       |         |       |           |
| 7 | 144936016 | rs31596421               | G    | A     | <i>Ccnd1</i> | Reg variation    | mus_musculus |       |         |       |           |
| 7 | 144936195 | rs31468976               | A    | G     | <i>Ccnd1</i> | Reg variation    | mus_musculus |       |         |       |           |
| 7 | 144936264 | rs31045523               | T    | C     | <i>Ccnd1</i> | Reg variation    | mus_musculus |       |         |       |           |
| 7 | 144936331 | rs31803348               | G    | A     | <i>Ccnd1</i> | Reg variation    | mus_musculus |       |         |       |           |
| 7 | 144936333 | rs32330151               | C    | T     | <i>Ccnd1</i> | Reg variation    | mus_musculus |       |         |       |           |
| 7 | 144936745 | rs31547865               | G    | A     | <i>Ccnd1</i> | Reg variation    | mus_musculus |       |         |       |           |
| 7 | 144936872 | rs32045353               | A    | G     | <i>Ccnd1</i> | Reg variation    | mus_musculus |       |         |       |           |
| 7 | 144938299 | rs8244021                | C    | A     | <i>Ccnd1</i> | Reg variation    | mus_musculus |       |         |       |           |
| 7 | 144938585 | rs32497754               | C    | T     | <i>Ccnd1</i> | Reg variation    | mus_musculus |       |         |       |           |
| 7 | 144939148 | rs31848301               | T    | C     | <i>Ccnd1</i> | Reg variation    | mus_musculus |       |         |       |           |
| 7 | 144939742 | rs31865090               | G    | T     | <i>Ccnd1</i> | Reg variation    | mus_musculus |       |         |       |           |
| 7 | 144939794 | rs13469480               | G    | A     | <i>Ccnd1</i> | Reg variation    | mus_musculus |       |         |       |           |
| 7 | 144940281 | rs32353670               | T    | G     | <i>Ccnd1</i> | Reg variation    | mus_musculus |       |         |       |           |
| 7 | 144941172 | rs31270823               | A    | G     | <i>Ccnd1</i> | Reg variation    | mus_musculus |       |         |       |           |
| 7 | 144941446 | rs31845855               | G    | A     | <i>Ccnd1</i> | Reg variation    | mus_musculus |       |         |       |           |
| 7 | 144941561 | rs31452228               | G    | A     | <i>Ccnd1</i> | Reg variation    | mus_musculus |       |         |       |           |
| 7 | 144941767 | rs48812931               | G    | A     | <i>Ccnd1</i> | Reg variation    | mus_musculus |       |         |       |           |
| 7 | 144941807 | rs31294656               | T    | A     | <i>Ccnd1</i> | Reg variation    | mus_musculus |       |         |       |           |
| 7 | 144929967 | rs261930887              | CT   | C     | <i>Ccnd1</i> | UTR variation    | mus_musculus |       |         |       |           |
| 7 | 144930680 | rs220901077; rs231566496 | T    | TA    | <i>Ccnd1</i> | UTR variation    | mus_musculus |       |         |       |           |
| 7 | 144931146 | rs244168286              | ATC  | A     | <i>Ccnd1</i> | UTR variation    | mus_musculus |       |         |       |           |
| 7 | 144931177 | .                        | GACC | GC, G | <i>Ccnd1</i> | UTR variation    | mus_musculus |       |         |       |           |
| 7 | 144932208 | rs222230778              | C    | CT    | <i>Ccnd1</i> | UTR variation    | mus_musculus |       |         |       |           |
| 7 | 144932382 | rs260217983; rs215788702 | A    | ATC   | <i>Ccnd1</i> | UTR variation    | mus_musculus |       |         |       |           |
| 7 | 144930069 | rs8258594                | C    | T     | <i>Ccnd1</i> | UTR variation    | mus_musculus |       |         |       |           |
| 7 | 144930161 | rs8258595                | T    | C     | <i>Ccnd1</i> | UTR variation    | mus_musculus |       |         |       |           |
| 7 | 144930387 | rs48083722               | C    | T     | <i>Ccnd1</i> | UTR variation    | mus_musculus |       |         |       |           |
| 7 | 144930431 | rs38195432               | A    | T     | <i>Ccnd1</i> | UTR variation    | mus_musculus |       |         |       |           |
| 7 | 144930761 | rs49774158               | T    | C     | <i>Ccnd1</i> | UTR variation    | mus_musculus |       |         |       |           |
| 7 | 144930847 | rs38006732               | T    | C     | <i>Ccnd1</i> | UTR variation    | mus_musculus |       |         |       |           |
| 7 | 144930965 | rs51407800               | C    | T     | <i>Ccnd1</i> | UTR variation    | mus_musculus |       |         |       |           |
| 7 | 144931205 | rs51417353               | G    | A     | <i>Ccnd1</i> | UTR variation    | mus_musculus |       |         |       |           |
| 7 | 144931889 | rs13469483               | T    | C     | <i>Ccnd1</i> | UTR variation    | mus_musculus |       |         |       |           |
| 7 | 144932217 | rs227698015              | A    | T     | <i>Ccnd1</i> | UTR variation    | mus_musculus |       |         |       |           |
| 7 | 144939742 | rs31865090               | G    | T     | <i>Ccnd1</i> | UTR variation    | mus_musculus |       |         |       |           |
| 7 | 144939794 | rs13469480               | G    | A     | <i>Ccnd1</i> | UTR variation    | mus_musculus |       |         |       |           |
| 7 | 19162589  | rs51203567               | C    | T     | <i>Gipr</i>  | missense_variant | mus_musculus | -1.33 | Neutral | 0.197 | Tolerated |
| 7 | 19157130  | rs32223696               | G    | C     | <i>Gipr</i>  | Reg variation    | mus_musculus |       |         |       |           |
| 7 | 19166273  | rs48422288               | A    | G     | <i>Gipr</i>  | Reg variation    | mus_musculus |       |         |       |           |
| 7 | 19167619  | rs47226126               | A    | G     | <i>Gipr</i>  | Reg variation    | mus_musculus |       |         |       |           |



|   |          |                        |               |                                                                                                                           |              |                               |              |      |         |       |           |  |
|---|----------|------------------------|---------------|---------------------------------------------------------------------------------------------------------------------------|--------------|-------------------------------|--------------|------|---------|-------|-----------|--|
| 7 | 19157130 | rs32223696             | G             | C                                                                                                                         | <i>Gipr</i>  | UTR variation                 | mus_musculus |      |         |       |           |  |
| 7 | 19165081 | rs31914536             | A             | C                                                                                                                         | <i>Gipr</i>  | UTR variation                 | mus_musculus |      |         |       |           |  |
| 7 | 70231919 | rs12698877             | A             | G                                                                                                                         | <i>AUTS2</i> | non_coding_transcript_variant | homo sapiens |      |         |       |           |  |
| 7 | 70317087 | rs2103132              | G             | C                                                                                                                         | <i>AUTS2</i> | non_coding_transcript_variant | homo sapiens |      |         |       |           |  |
| 7 | 70197261 | rs10618080             | CCACACACACACA | C, CCACA, CCACACA, CCACACACA, CCACACACACA, CCACACACACACACA, CCACACACACACACACA, CCACACACACACACACACA, CCACACACACACACACACACA | <i>AUTS2</i> | downstream_gene_variant       | homo sapiens |      |         |       |           |  |
| 7 | 70184697 | rs6975279              | C             | A                                                                                                                         | <i>AUTS2</i> | non_coding_transcript_variant | homo sapiens |      |         |       |           |  |
| 7 | 70197261 | rs10618080             | CCACACACACACA | C, CCACA, CCACACA, CCACACACA, CCACACACACA, CCACACACACACACA, CCACACACACACACACA, CCACACACACACACACACA, CCACACACACACACACACACA | <i>AUTS2</i> | NMD_transcript_variant        | homo sapiens |      |         |       |           |  |
| 7 | 70184697 | rs6975279              | C             | A                                                                                                                         | <i>AUTS2</i> | NMD_transcript_variant        | homo sapiens |      |         |       |           |  |
| 7 | 70184697 | rs6975279              | C             | A                                                                                                                         | <i>AUTS2</i> | intron_variant                | homo sapiens |      |         |       |           |  |
| 7 | 70231919 | rs12698877             | A             | G                                                                                                                         | <i>AUTS2</i> | NMD_transcript_variant        | homo sapiens |      |         |       |           |  |
| 7 | 70197261 | rs10618080             | CCACACACACACA | C, CCACA, CCACACA, CCACACACA, CCACACACACA, CCACACACACACACA, CCACACACACACACACA, CCACACACACACACACACA, CCACACACACACACACACACA | <i>AUTS2</i> | non_coding_transcript_variant | homo sapiens |      |         |       |           |  |
| 7 | 69724740 | rs610930               | A             | G, T                                                                                                                      | <i>AUTS2</i> | intron_variant                | homo sapiens |      |         |       |           |  |
| 7 | 69941675 | rs6947395              | A             | T                                                                                                                         | <i>AUTS2</i> | NMD_transcript_variant        | homo sapiens |      |         |       |           |  |
| 7 | 69941675 | rs6947395              | A             | T                                                                                                                         | <i>AUTS2</i> | intron_variant                | homo sapiens |      |         |       |           |  |
| 7 | 69941675 | rs6947395              | A             | T                                                                                                                         | <i>AUTS2</i> | non_coding_transcript_variant | homo sapiens |      |         |       |           |  |
| 7 | 70317087 | rs2103132              | G             | C                                                                                                                         | <i>AUTS2</i> | intron_variant                | homo sapiens |      |         |       |           |  |
| 7 | 70197261 | rs10618080             | CCACACACACACA | C, CCACA, CCACACA, CCACACACA, CCACACACACA, CCACACACACACACA, CCACACACACACACACA, CCACACACACACACACACA, CCACACACACACACACACACA | <i>AUTS2</i> | intron_variant                | homo sapiens |      |         |       |           |  |
| 7 | 69724740 | rs610930               | A             | G, T                                                                                                                      | <i>AUTS2</i> | non_coding_transcript_variant | homo sapiens |      |         |       |           |  |
| 7 | 70231919 | rs12698877             | A             | G                                                                                                                         | <i>AUTS2</i> | intron_variant                | homo sapiens |      |         |       |           |  |
| 8 | 68899458 | rs48623874             | G             | A                                                                                                                         | <i>Lpl</i>   | missense_variant              | mus_musculus | 1.81 | Neutral | 1     | Tolerated |  |
| 8 | 68901238 | rs33121577             | A             | G                                                                                                                         | <i>Lpl</i>   | missense_variant              | mus_musculus | 0.76 | Neutral | 0.056 | Tolerated |  |
| 8 | 68879532 | rs3023186; rs239544736 | G             | GT                                                                                                                        | <i>Lpl</i>   | Reg variation                 | mus_musculus |      |         |       |           |  |
| 8 | 68886124 | rs241479243            | CA            | C                                                                                                                         | <i>Lpl</i>   | Reg variation                 | mus_musculus |      |         |       |           |  |
| 8 | 68886220 | rs265083349            | GTTAT         | G                                                                                                                         | <i>Lpl</i>   | Reg variation                 | mus_musculus |      |         |       |           |  |
| 8 | 68886249 | rs249645271            | ATT           | A                                                                                                                         | <i>Lpl</i>   | Reg variation                 | mus_musculus |      |         |       |           |  |
| 8 | 68887972 | rs228752180            | TCATG         | T                                                                                                                         | <i>Lpl</i>   | Reg variation                 | mus_musculus |      |         |       |           |  |
| 8 | 68888862 | rs221484581            | C             | CA                                                                                                                        | <i>Lpl</i>   | Reg variation                 | mus_musculus |      |         |       |           |  |
| 8 | 68889584 | rs250506436            | AG            | A                                                                                                                         | <i>Lpl</i>   | Reg variation                 | mus_musculus |      |         |       |           |  |
| 8 | 68889685 | rs216689880            | A             | AAT                                                                                                                       | <i>Lpl</i>   | Reg variation                 | mus_musculus |      |         |       |           |  |
| 8 | 68890349 | rs241287417            | T             | TCTCAACTG                                                                                                                 | <i>Lpl</i>   | Reg variation                 | mus_musculus |      |         |       |           |  |
| 8 | 68891362 | rs257133866            | CTTAAATCG     | C                                                                                                                         | <i>Lpl</i>   | Reg variation                 | mus_musculus |      |         |       |           |  |
| 8 | 68892304 | rs259361487            | TA            | T                                                                                                                         | <i>Lpl</i>   | Reg variation                 | mus_musculus |      |         |       |           |  |
| 8 | 68893248 | rs215602791            | A             | AG                                                                                                                        | <i>Lpl</i>   | Reg variation                 | mus_musculus |      |         |       |           |  |
| 8 | 68893524 | rs218080097            | T             | TTTG                                                                                                                      | <i>Lpl</i>   | Reg variation                 | mus_musculus |      |         |       |           |  |

|   |          |             |                 |        |     |               |              |  |  |  |  |
|---|----------|-------------|-----------------|--------|-----|---------------|--------------|--|--|--|--|
| 8 | 68893775 | rs234005601 | C               | CT     | Lpl | Reg variation | mus_musculus |  |  |  |  |
| 8 | 68897032 | .           | AC              | A      | Lpl | Reg variation | mus_musculus |  |  |  |  |
| 8 | 68897347 | rs231764516 | TGAAGTCAA       | T      | Lpl | Reg variation | mus_musculus |  |  |  |  |
| 8 | 68899711 | rs242875337 | ATAGT           | A      | Lpl | Reg variation | mus_musculus |  |  |  |  |
| 8 | 68899811 | rs216706597 | A               | AG     | Lpl | Reg variation | mus_musculus |  |  |  |  |
| 8 | 68899832 | .           | GA              | G      | Lpl | Reg variation | mus_musculus |  |  |  |  |
| 8 | 68900039 | .           | GAA             | G      | Lpl | Reg variation | mus_musculus |  |  |  |  |
| 8 | 68900096 | rs235847084 | TAG             | T      | Lpl | Reg variation | mus_musculus |  |  |  |  |
| 8 | 68900212 | .           | GATATAGAACGTAGC | G      | Lpl | Reg variation | mus_musculus |  |  |  |  |
| 8 | 68900264 | rs242041667 | T               | TGATTG | Lpl | Reg variation | mus_musculus |  |  |  |  |
| 8 | 68906968 | rs247832424 | T               | TA     | Lpl | Reg variation | mus_musculus |  |  |  |  |
| 8 | 68907215 | rs216756925 | T               | TTTTA  | Lpl | Reg variation | mus_musculus |  |  |  |  |
| 8 | 68907292 | rs231048829 | GACCAGA         | G      | Lpl | Reg variation | mus_musculus |  |  |  |  |
| 8 | 68878573 | rs32941504  | G               | A      | Lpl | Reg variation | mus_musculus |  |  |  |  |
| 8 | 68878817 | rs8253505   | T               | C      | Lpl | Reg variation | mus_musculus |  |  |  |  |
| 8 | 68879857 | rs33041739  | G               | T      | Lpl | Reg variation | mus_musculus |  |  |  |  |
| 8 | 68879875 | rs32556648  | C               | A      | Lpl | Reg variation | mus_musculus |  |  |  |  |
| 8 | 68880605 | rs32769281  | T               | C      | Lpl | Reg variation | mus_musculus |  |  |  |  |
| 8 | 68885753 | rs33356579  | T               | C      | Lpl | Reg variation | mus_musculus |  |  |  |  |
| 8 | 68885889 | rs32770697  | A               | T      | Lpl | Reg variation | mus_musculus |  |  |  |  |
| 8 | 68885897 | rs32715994  | A               | G      | Lpl | Reg variation | mus_musculus |  |  |  |  |
| 8 | 68885956 | rs33485188  | T               | A      | Lpl | Reg variation | mus_musculus |  |  |  |  |
| 8 | 68886083 | rs33182929  | G               | A      | Lpl | Reg variation | mus_musculus |  |  |  |  |
| 8 | 68886278 | rs33216724  | A               | T      | Lpl | Reg variation | mus_musculus |  |  |  |  |
| 8 | 68886331 | rs33304150  | T               | C      | Lpl | Reg variation | mus_musculus |  |  |  |  |
| 8 | 68886482 | rs32857410  | C               | T      | Lpl | Reg variation | mus_musculus |  |  |  |  |
| 8 | 68886885 | rs33021201  | A               | G      | Lpl | Reg variation | mus_musculus |  |  |  |  |
| 8 | 68887154 | rs33412028  | C               | T      | Lpl | Reg variation | mus_musculus |  |  |  |  |
| 8 | 68887183 | rs33505203  | G               | C      | Lpl | Reg variation | mus_musculus |  |  |  |  |
| 8 | 68887324 | rs32682151  | C               | T      | Lpl | Reg variation | mus_musculus |  |  |  |  |
| 8 | 68887444 | rs33396764  | G               | A      | Lpl | Reg variation | mus_musculus |  |  |  |  |
| 8 | 68887648 | rs33414083  | T               | G      | Lpl | Reg variation | mus_musculus |  |  |  |  |
| 8 | 68887740 | rs32949201  | A               | G      | Lpl | Reg variation | mus_musculus |  |  |  |  |
| 8 | 68887916 | rs32592550  | C               | T      | Lpl | Reg variation | mus_musculus |  |  |  |  |
| 8 | 68888515 | rs48253582  | C               | T      | Lpl | Reg variation | mus_musculus |  |  |  |  |
| 8 | 68888524 | rs33027031  | T               | A      | Lpl | Reg variation | mus_musculus |  |  |  |  |
| 8 | 68888532 | rs33300695  | A               | C      | Lpl | Reg variation | mus_musculus |  |  |  |  |
| 8 | 68888569 | rs247979309 | G               | A      | Lpl | Reg variation | mus_musculus |  |  |  |  |
| 8 | 68888870 | rs107995146 | A               | G      | Lpl | Reg variation | mus_musculus |  |  |  |  |
| 8 | 68889009 | rs265775573 | A               | G      | Lpl | Reg variation | mus_musculus |  |  |  |  |
| 8 | 68889067 | rs224505965 | T               | G      | Lpl | Reg variation | mus_musculus |  |  |  |  |
| 8 | 68889301 | rs32866278  | A               | G      | Lpl | Reg variation | mus_musculus |  |  |  |  |
| 8 | 68889302 | rs33193934  | T               | G      | Lpl | Reg variation | mus_musculus |  |  |  |  |
| 8 | 68889465 | rs50459181  | A               | G      | Lpl | Reg variation | mus_musculus |  |  |  |  |
| 8 | 68889676 | rs52526324  | G               | T      | Lpl | Reg variation | mus_musculus |  |  |  |  |
| 8 | 68890302 | rs50506189  | C               | T      | Lpl | Reg variation | mus_musculus |  |  |  |  |
| 8 | 68890324 | rs48228303  | A               | C      | Lpl | Reg variation | mus_musculus |  |  |  |  |
| 8 | 68890340 | .           | A               | G      | Lpl | Reg variation | mus_musculus |  |  |  |  |
| 8 | 68890344 | rs46306115  | G               | T      | Lpl | Reg variation | mus_musculus |  |  |  |  |
| 8 | 68890363 | rs47514228  | G               | T      | Lpl | Reg variation | mus_musculus |  |  |  |  |
| 8 | 68890400 | rs45912580  | T               | C      | Lpl | Reg variation | mus_musculus |  |  |  |  |
| 8 | 68890565 | rs49608103  | G               | A      | Lpl | Reg variation | mus_musculus |  |  |  |  |
| 8 | 68890636 | rs47907860  | T               | C      | Lpl | Reg variation | mus_musculus |  |  |  |  |
| 8 | 68890709 | rs46928002  | A               | C      | Lpl | Reg variation | mus_musculus |  |  |  |  |

|   |          |             |   |   |     |               |              |  |  |  |  |
|---|----------|-------------|---|---|-----|---------------|--------------|--|--|--|--|
| 8 | 68890765 | rs45890398  | G | A | Lpl | Reg variation | mus_musculus |  |  |  |  |
| 8 | 68891079 | rs51892247  | A | G | Lpl | Reg variation | mus_musculus |  |  |  |  |
| 8 | 68891110 | rs48398317  | C | A | Lpl | Reg variation | mus_musculus |  |  |  |  |
| 8 | 68891421 | rs47926056  | A | G | Lpl | Reg variation | mus_musculus |  |  |  |  |
| 8 | 68891618 | rs48350060  | A | G | Lpl | Reg variation | mus_musculus |  |  |  |  |
| 8 | 68891628 | rs51915785  | A | G | Lpl | Reg variation | mus_musculus |  |  |  |  |
| 8 | 68891725 | rs50035397  | T | C | Lpl | Reg variation | mus_musculus |  |  |  |  |
| 8 | 68891765 | rs48973967  | C | T | Lpl | Reg variation | mus_musculus |  |  |  |  |
| 8 | 68891780 | rs47797004  | G | A | Lpl | Reg variation | mus_musculus |  |  |  |  |
| 8 | 68891845 | rs50540467  | C | T | Lpl | Reg variation | mus_musculus |  |  |  |  |
| 8 | 68891933 | rs51976370  | T | C | Lpl | Reg variation | mus_musculus |  |  |  |  |
| 8 | 68891957 | rs49830518  | C | T | Lpl | Reg variation | mus_musculus |  |  |  |  |
| 8 | 68892061 | rs46609173  | A | G | Lpl | Reg variation | mus_musculus |  |  |  |  |
| 8 | 68892975 | rs33038488  | T | C | Lpl | Reg variation | mus_musculus |  |  |  |  |
| 8 | 68893051 | rs32631897  | T | C | Lpl | Reg variation | mus_musculus |  |  |  |  |
| 8 | 68893205 | rs32686500  | C | T | Lpl | Reg variation | mus_musculus |  |  |  |  |
| 8 | 68893263 | rs52102852  | T | A | Lpl | Reg variation | mus_musculus |  |  |  |  |
| 8 | 68893269 | rs229316911 | T | A | Lpl | Reg variation | mus_musculus |  |  |  |  |
| 8 | 68893270 | rs242410323 | T | A | Lpl | Reg variation | mus_musculus |  |  |  |  |
| 8 | 68893271 | rs212023399 | T | A | Lpl | Reg variation | mus_musculus |  |  |  |  |
| 8 | 68893358 | rs52535639  | T | G | Lpl | Reg variation | mus_musculus |  |  |  |  |
| 8 | 68893371 | rs46938749  | T | G | Lpl | Reg variation | mus_musculus |  |  |  |  |
| 8 | 68893462 | rs46347450  | A | C | Lpl | Reg variation | mus_musculus |  |  |  |  |
| 8 | 68893491 | rs48397782  | A | G | Lpl | Reg variation | mus_musculus |  |  |  |  |
| 8 | 68893571 | rs52438616  | T | G | Lpl | Reg variation | mus_musculus |  |  |  |  |
| 8 | 68893610 | rs52162972  | G | A | Lpl | Reg variation | mus_musculus |  |  |  |  |
| 8 | 68893647 | rs49879374  | T | C | Lpl | Reg variation | mus_musculus |  |  |  |  |
| 8 | 68893686 | rs33411969  | A | G | Lpl | Reg variation | mus_musculus |  |  |  |  |
| 8 | 68893825 | rs33576186  | A | G | Lpl | Reg variation | mus_musculus |  |  |  |  |
| 8 | 68893918 | rs32734605  | T | C | Lpl | Reg variation | mus_musculus |  |  |  |  |
| 8 | 68894130 | rs33163617  | T | C | Lpl | Reg variation | mus_musculus |  |  |  |  |
| 8 | 68894190 | rs33082833  | T | C | Lpl | Reg variation | mus_musculus |  |  |  |  |
| 8 | 68894228 | rs6371160   | G | T | Lpl | Reg variation | mus_musculus |  |  |  |  |
| 8 | 68894449 | rs3681089   | T | C | Lpl | Reg variation | mus_musculus |  |  |  |  |
| 8 | 68894484 | rs3681597   | G | T | Lpl | Reg variation | mus_musculus |  |  |  |  |
| 8 | 68896096 | rs50274347  | A | C | Lpl | Reg variation | mus_musculus |  |  |  |  |
| 8 | 68896108 | rs3719678   | G | A | Lpl | Reg variation | mus_musculus |  |  |  |  |
| 8 | 68896181 | rs3719824   | T | G | Lpl | Reg variation | mus_musculus |  |  |  |  |
| 8 | 68896182 | rs3719826   | T | A | Lpl | Reg variation | mus_musculus |  |  |  |  |
| 8 | 68896306 | rs3720934   | G | A | Lpl | Reg variation | mus_musculus |  |  |  |  |
| 8 | 68896627 | rs33594984  | C | T | Lpl | Reg variation | mus_musculus |  |  |  |  |
| 8 | 68896684 | rs33075533  | G | A | Lpl | Reg variation | mus_musculus |  |  |  |  |
| 8 | 68896906 | rs33104764  | C | G | Lpl | Reg variation | mus_musculus |  |  |  |  |
| 8 | 68897258 | rs33171241  | G | C | Lpl | Reg variation | mus_musculus |  |  |  |  |
| 8 | 68897294 | rs32747684  | G | A | Lpl | Reg variation | mus_musculus |  |  |  |  |
| 8 | 68897854 | rs3670395   | C | T | Lpl | Reg variation | mus_musculus |  |  |  |  |
| 8 | 68898098 | rs32798109  | C | G | Lpl | Reg variation | mus_musculus |  |  |  |  |
| 8 | 68898127 | rs33093053  | T | C | Lpl | Reg variation | mus_musculus |  |  |  |  |
| 8 | 68898283 | rs6332474   | A | G | Lpl | Reg variation | mus_musculus |  |  |  |  |
| 8 | 68898320 | rs6332929   | A | T | Lpl | Reg variation | mus_musculus |  |  |  |  |
| 8 | 68898396 | rs6333402   | A | C | Lpl | Reg variation | mus_musculus |  |  |  |  |
| 8 | 68898461 | rs33252527  | A | G | Lpl | Reg variation | mus_musculus |  |  |  |  |
| 8 | 68898523 | rs33356740  | T | C | Lpl | Reg variation | mus_musculus |  |  |  |  |
| 8 | 68899244 | rs50274452  | G | A | Lpl | Reg variation | mus_musculus |  |  |  |  |

|   |          |             |         |                   |     |               |              |  |  |  |  |
|---|----------|-------------|---------|-------------------|-----|---------------|--------------|--|--|--|--|
| 8 | 68899300 | rs47057925  | G       | A                 | Lpl | Reg variation | mus_musculus |  |  |  |  |
| 8 | 68899309 | rs47707945  | C       | T                 | Lpl | Reg variation | mus_musculus |  |  |  |  |
| 8 | 68899377 | rs46828047  | T       | C                 | Lpl | Reg variation | mus_musculus |  |  |  |  |
| 8 | 68899458 | rs48623874  | G       | A                 | Lpl | Reg variation | mus_musculus |  |  |  |  |
| 8 | 68899487 | rs48000521  | G       | A                 | Lpl | Reg variation | mus_musculus |  |  |  |  |
| 8 | 68899545 | rs51454640  | T       | C                 | Lpl | Reg variation | mus_musculus |  |  |  |  |
| 8 | 68899796 | rs52318336  | G       | A                 | Lpl | Reg variation | mus_musculus |  |  |  |  |
| 8 | 68899818 | rs587580964 | G       | A                 | Lpl | Reg variation | mus_musculus |  |  |  |  |
| 8 | 68900081 | .           | A       | T                 | Lpl | Reg variation | mus_musculus |  |  |  |  |
| 8 | 68900185 | rs578682616 | G       | A                 | Lpl | Reg variation | mus_musculus |  |  |  |  |
| 8 | 68900205 | rs587036243 | A       | C                 | Lpl | Reg variation | mus_musculus |  |  |  |  |
| 8 | 68900209 | rs581460368 | A       | C                 | Lpl | Reg variation | mus_musculus |  |  |  |  |
| 8 | 68900228 | rs211834364 | T       | G                 | Lpl | Reg variation | mus_musculus |  |  |  |  |
| 8 | 68900229 | rs236978495 | A       | G                 | Lpl | Reg variation | mus_musculus |  |  |  |  |
| 8 | 68900393 | rs45828197  | C       | T                 | Lpl | Reg variation | mus_musculus |  |  |  |  |
| 8 | 68900404 | rs47763513  | C       | A                 | Lpl | Reg variation | mus_musculus |  |  |  |  |
| 8 | 68900406 | rs48301205  | G       | C                 | Lpl | Reg variation | mus_musculus |  |  |  |  |
| 8 | 68900559 | rs49151429  | A       | G                 | Lpl | Reg variation | mus_musculus |  |  |  |  |
| 8 | 68900564 | rs46425177  | A       | G                 | Lpl | Reg variation | mus_musculus |  |  |  |  |
| 8 | 68900581 | rs51245860  | A       | G                 | Lpl | Reg variation | mus_musculus |  |  |  |  |
| 8 | 68900635 | rs47014811  | G       | T                 | Lpl | Reg variation | mus_musculus |  |  |  |  |
| 8 | 68900710 | rs48205804  | G       | A                 | Lpl | Reg variation | mus_musculus |  |  |  |  |
| 8 | 68900749 | rs261898345 | G       | T                 | Lpl | Reg variation | mus_musculus |  |  |  |  |
| 8 | 68900751 | rs214536837 | C       | T                 | Lpl | Reg variation | mus_musculus |  |  |  |  |
| 8 | 68900752 | rs239550718 | A       | G                 | Lpl | Reg variation | mus_musculus |  |  |  |  |
| 8 | 68900786 | rs233478021 | G       | A                 | Lpl | Reg variation | mus_musculus |  |  |  |  |
| 8 | 68900818 | rs47383416  | G       | A                 | Lpl | Reg variation | mus_musculus |  |  |  |  |
| 8 | 68906939 | rs32592319  | G       | C                 | Lpl | Reg variation | mus_musculus |  |  |  |  |
| 8 | 68907034 | rs51410471  | A       | G                 | Lpl | Reg variation | mus_musculus |  |  |  |  |
| 8 | 68907102 | rs50956194  | A       | G                 | Lpl | Reg variation | mus_musculus |  |  |  |  |
| 8 | 68907303 | .           | A       | G                 | Lpl | Reg variation | mus_musculus |  |  |  |  |
| 8 | 68907333 | rs33449771  | G       | A                 | Lpl | Reg variation | mus_musculus |  |  |  |  |
| 8 | 68907336 | rs33176327  | G       | A                 | Lpl | Reg variation | mus_musculus |  |  |  |  |
| 8 | 68907355 | rs50695992  | C       | T                 | Lpl | Reg variation | mus_musculus |  |  |  |  |
| 8 | 68907378 | rs48718417  | A       | T                 | Lpl | Reg variation | mus_musculus |  |  |  |  |
| 8 | 68904980 | rs262678694 | G       | GT                | Lpl | UTR variation | mus_musculus |  |  |  |  |
| 8 | 68905231 | rs229666878 | G       | GGATAGATGTTGAAAAT | Lpl | UTR variation | mus_musculus |  |  |  |  |
| 8 | 68905480 | .           | A       | AG                | Lpl | UTR variation | mus_musculus |  |  |  |  |
| 8 | 68905549 | .           | GA      | G                 | Lpl | UTR variation | mus_musculus |  |  |  |  |
| 8 | 68905725 | rs222423431 | ACTT    | A                 | Lpl | UTR variation | mus_musculus |  |  |  |  |
| 8 | 68906070 | rs229841610 | AT      | A                 | Lpl | UTR variation | mus_musculus |  |  |  |  |
| 8 | 68907292 | rs231048829 | GACCAGA | G                 | Lpl | UTR variation | mus_musculus |  |  |  |  |
| 8 | 68880605 | rs32769281  | T       | C                 | Lpl | UTR variation | mus_musculus |  |  |  |  |
| 8 | 68904539 | rs46345856  | T       | C                 | Lpl | UTR variation | mus_musculus |  |  |  |  |
| 8 | 68904738 | rs48259087  | T       | C                 | Lpl | UTR variation | mus_musculus |  |  |  |  |
| 8 | 68904747 | rs8253499   | G       | T                 | Lpl | UTR variation | mus_musculus |  |  |  |  |
| 8 | 68904797 | rs50930818  | C       | T                 | Lpl | UTR variation | mus_musculus |  |  |  |  |
| 8 | 68904931 | rs49173156  | A       | G                 | Lpl | UTR variation | mus_musculus |  |  |  |  |
| 8 | 68904952 | rs47929877  | T       | C                 | Lpl | UTR variation | mus_musculus |  |  |  |  |
| 8 | 68904954 | rs50307489  | A       | G                 | Lpl | UTR variation | mus_musculus |  |  |  |  |
| 8 | 68905178 | rs244771561 | A       | G                 | Lpl | UTR variation | mus_musculus |  |  |  |  |
| 8 | 68905238 | rs254737771 | G       | A                 | Lpl | UTR variation | mus_musculus |  |  |  |  |
| 8 | 68905258 | rs50958623  | A       | G                 | Lpl | UTR variation | mus_musculus |  |  |  |  |
| 8 | 68905297 | rs49436803  | A       | C                 | Lpl | UTR variation | mus_musculus |  |  |  |  |

|    |           |                          |              |                     |          |                               |              |       |         |    |          |
|----|-----------|--------------------------|--------------|---------------------|----------|-------------------------------|--------------|-------|---------|----|----------|
| 8  | 68905347  | rs232011516              | G            | A                   | Lpl      | UTR variation                 | mus_musculus |       |         |    |          |
| 8  | 68905376  | rs52439029               | T            | C                   | Lpl      | UTR variation                 | mus_musculus |       |         |    |          |
| 8  | 68905792  | rs13470201               | C            | A                   | Lpl      | UTR variation                 | mus_musculus |       |         |    |          |
| 8  | 68905874  | rs108904688              | T            | C                   | Lpl      | UTR variation                 | mus_musculus |       |         |    |          |
| 8  | 68906389  | rs8236728                | G            | A                   | Lpl      | UTR variation                 | mus_musculus |       |         |    |          |
| 8  | 68906598  | rs8253498                | C            | T                   | Lpl      | UTR variation                 | mus_musculus |       |         |    |          |
| 8  | 68907303  | .                        | A            | G                   | Lpl      | UTR variation                 | mus_musculus |       |         |    |          |
| 8  | 68907333  | rs33449771               | G            | A                   | Lpl      | UTR variation                 | mus_musculus |       |         |    |          |
| 8  | 68907336  | rs33176327               | G            | A                   | Lpl      | UTR variation                 | mus_musculus |       |         |    |          |
| 8  | 68907355  | rs50695992               | C            | T                   | Lpl      | UTR variation                 | mus_musculus |       |         |    |          |
| 8  | 68907378  | rs48718417               | A            | T                   | Lpl      | UTR variation                 | mus_musculus |       |         |    |          |
| 8  | 107374794 | .                        | CTGTGTG      | C                   | Nfat5    | Reg variation                 | mus_musculus |       |         |    |          |
| 8  | 107332156 | rs13479970               | A            | G                   | Nfat5    | Reg variation                 | mus_musculus |       |         |    |          |
| 8  | 107353520 | rs107911894              | A            | C                   | Nfat5    | Reg variation                 | mus_musculus |       |         |    |          |
| 8  | 107374794 | .                        | CTGTGTG      | C                   | Nfat5    | UTR variation                 | mus_musculus |       |         |    |          |
| 8  | 45763675  | rs232080795; rs221429829 | CAGAGAG      | CAG, C              | Sorbs2   | Reg variation                 | mus_musculus |       |         |    |          |
| 8  | 45579584  | .                        | A            | C                   | Sorbs2   | Reg variation                 | mus_musculus |       |         |    |          |
| 8  | 19973410  | rs10096633               | C            | T                   | LPL      |                               | homo sapiens |       |         |    |          |
| 8  | 19994799  | rs17411031               | C            | G                   | LPL      |                               | homo sapiens |       |         |    |          |
| 8  | 19962213  | rs328                    | C            | G                   | LPL      | NMD_transcript_variant        | homo sapiens |       |         |    |          |
| 8  | 19962213  | rs328                    | C            | G                   | LPL      | stop_gained                   | homo sapiens |       |         |    |          |
| 8  | 19985660  | rs17091891               | T            | A, C                | LPL      |                               | homo sapiens |       |         |    |          |
| 8  | 19962213  | rs328                    | C            | G                   | LPL      | 3_prime_UTR_variant           | homo sapiens |       |         |    |          |
| 8  | 117158058 | rs149935213              | GCTT         | G                   | SLC30A8  | downstream_gene_variant       | homo sapiens |       |         |    |          |
| 8  | 117154088 | rs60461843               | T            | A                   | SLC30A8  | downstream_gene_variant       | homo sapiens |       |         |    |          |
| 8  | 117012076 | rs531347476              | C            | A, T                | SLC30A8  | non_coding_transcript_variant | homo sapiens |       |         |    |          |
| 8  | 117158058 | rs149935213              | GCTT         | G                   | SLC30A8  | intron_variant                | homo sapiens |       |         |    |          |
| 8  | 117172786 | rs3802177                | G            | A                   | SLC30A8  | 3_prime_UTR_variant           | homo sapiens |       |         |    |          |
| 8  | 117154088 | rs60461843               | T            | A                   | SLC30A8  | intron_variant                | homo sapiens |       |         |    |          |
| 8  | 117172544 | rs13266634               | C            | A, T                | SLC30A8  | missense_variant              | homo sapiens | --    | --      | -- | --       |
| 8  | 117172544 | rs13266634               | C            | A, T                | SLC30A8  | synonymous_variant            | homo sapiens |       |         |    |          |
| 8  | 117173494 | rs11558471               | A            | G                   | SLC30A8  | 3_prime_UTR_variant           | homo sapiens |       |         |    |          |
| 8  | 117012076 | rs531347476              | C            | A, T                | SLC30A8  | intron_variant                | homo sapiens |       |         |    |          |
| 8  | 117173494 | rs11558471               | A            | G                   | SLC30A8  | downstream_gene_variant       | homo sapiens |       |         |    |          |
| 8  | 117392433 | rs80244329               | G            | A                   | SLC30A8  |                               | homo sapiens |       |         |    |          |
| 9  | 45369899  | rs230633213              | G            | GA                  | Fxyd6    | Reg variation                 | mus_musculus |       |         |    |          |
| 9  | 45395177  | rs222001130              | CTGTCTGTGCCG | C                   | Fxyd6    | UTR variation                 | mus_musculus |       |         |    |          |
| 9  | 45395383  | rs225711892              | T            | TGA                 | Fxyd6    | UTR variation                 | mus_musculus |       |         |    |          |
| 11 | 96100015  | .                        | C            | T                   | Calcoco2 | missense_variant              | mus_musculus | -1.06 | Neutral | 0  | Damaging |
| 11 | 96112342  | .                        | GTC          | G                   | Calcoco2 | Reg variation                 | mus_musculus |       |         |    |          |
| 11 | 96112376  | rs251479768              | AAAAAC       | A                   | Calcoco2 | Reg variation                 | mus_musculus |       |         |    |          |
| 11 | 96113156  | rs225618432              | T            | TTTATTTA            | Calcoco2 | Reg variation                 | mus_musculus |       |         |    |          |
| 11 | 96113224  | rs247345064              | T            | TCAAAA              | Calcoco2 | Reg variation                 | mus_musculus |       |         |    |          |
| 11 | 96113926  | .                        | C            | CCTGTCTCCCCTCCCCCAG | Calcoco2 | Reg variation                 | mus_musculus |       |         |    |          |
| 11 | 96112041  | rs51780927               | T            | C                   | Calcoco2 | Reg variation                 | mus_musculus |       |         |    |          |
| 11 | 96112108  | rs51832485               | G            | C                   | Calcoco2 | Reg variation                 | mus_musculus |       |         |    |          |
| 11 | 96112111  | rs49107918               | G            | A                   | Calcoco2 | Reg variation                 | mus_musculus |       |         |    |          |
| 11 | 96112210  | rs50927857               | A            | G                   | Calcoco2 | Reg variation                 | mus_musculus |       |         |    |          |
| 11 | 96112215  | rs51230239               | A            | T                   | Calcoco2 | Reg variation                 | mus_musculus |       |         |    |          |
| 11 | 96112286  | rs49677231               | A            | C                   | Calcoco2 | Reg variation                 | mus_musculus |       |         |    |          |
| 11 | 96112607  | rs27071360               | A            | C                   | Calcoco2 | Reg variation                 | mus_musculus |       |         |    |          |
| 11 | 96112674  | rs263989267              | G            | A                   | Calcoco2 | Reg variation                 | mus_musculus |       |         |    |          |
| 11 | 96112821  | rs51486869               | A            | T                   | Calcoco2 | Reg variation                 | mus_musculus |       |         |    |          |
| 11 | 96113059  | rs49317018               | T            | A                   | Calcoco2 | Reg variation                 | mus_musculus |       |         |    |          |

|    |          |                          |                   |                    |          |                  |              |       |             |       |          |
|----|----------|--------------------------|-------------------|--------------------|----------|------------------|--------------|-------|-------------|-------|----------|
| 11 | 96113234 | rs29415598               | G                 | A                  | Calcoco2 | Reg variation    | mus_musculus |       |             |       |          |
| 11 | 96113332 | rs27071358               | C                 | T                  | Calcoco2 | Reg variation    | mus_musculus |       |             |       |          |
| 11 | 96113378 | rs231945826              | C                 | T                  | Calcoco2 | Reg variation    | mus_musculus |       |             |       |          |
| 11 | 96113504 | rs27071357               | A                 | C                  | Calcoco2 | Reg variation    | mus_musculus |       |             |       |          |
| 11 | 96113936 | rs50485052               | C                 | T                  | Calcoco2 | Reg variation    | mus_musculus |       |             |       |          |
| 11 | 96113943 | rs48461534               | A                 | C                  | Calcoco2 | Reg variation    | mus_musculus |       |             |       |          |
| 11 | 96111938 | rs50368491               | A                 | T                  | Calcoco2 | UTR variation    | mus_musculus |       |             |       |          |
| 11 | 72889182 | rs26934208               | G                 | A                  | Zzefl    | missense_variant | mus_musculus | -0.29 | Neutral     | 0.037 | Damaging |
| 11 | 72924691 | .                        | A                 | C                  | Zzefl    | missense_variant | mus_musculus | -2.8  | Deleterious | 0.001 | Damaging |
| 11 | 72795108 | rs240296082; rs244793512 | A                 | AT                 | Zzefl    | Reg variation    | mus_musculus |       |             |       |          |
| 11 | 72795975 | rs231341755; rs221488009 | A                 | AAAAC              | Zzefl    | Reg variation    | mus_musculus |       |             |       |          |
| 11 | 72796655 | rs240026655              | GGGCT             | G                  | Zzefl    | Reg variation    | mus_musculus |       |             |       |          |
| 11 | 72796911 | rs247789646              | CA                | C                  | Zzefl    | Reg variation    | mus_musculus |       |             |       |          |
| 11 | 72797348 | rs238316670              | GT                | G                  | Zzefl    | Reg variation    | mus_musculus |       |             |       |          |
| 11 | 72797975 | rs236861626              | AACTT             | A                  | Zzefl    | Reg variation    | mus_musculus |       |             |       |          |
| 11 | 72798601 | rs225935422              | A                 | AAAAAC             | Zzefl    | Reg variation    | mus_musculus |       |             |       |          |
| 11 | 72798735 | rs246073330              | ACACACACACT       | A                  | Zzefl    | Reg variation    | mus_musculus |       |             |       |          |
| 11 | 72800215 | rs259903573              | GACTC             | G                  | Zzefl    | Reg variation    | mus_musculus |       |             |       |          |
| 11 | 72801788 | .                        | A                 | AT                 | Zzefl    | Reg variation    | mus_musculus |       |             |       |          |
| 11 | 72802524 | rs248317810              | CTGGAGAAAAGTTGTCA | C                  | Zzefl    | Reg variation    | mus_musculus |       |             |       |          |
| 11 | 72829785 | rs224019845              | ATC               | A                  | Zzefl    | Reg variation    | mus_musculus |       |             |       |          |
| 11 | 72830366 | .                        | GAA               | G                  | Zzefl    | Reg variation    | mus_musculus |       |             |       |          |
| 11 | 72832936 | .                        | ATTTTT            | A                  | Zzefl    | Reg variation    | mus_musculus |       |             |       |          |
| 11 | 72836117 | rs236388633              | AC                | A                  | Zzefl    | Reg variation    | mus_musculus |       |             |       |          |
| 11 | 72836668 | .                        | AT                | A                  | Zzefl    | Reg variation    | mus_musculus |       |             |       |          |
| 11 | 72837107 | rs235850183; rs238151669 | T                 | TTATGTGTG, TTATGTG | Zzefl    | Reg variation    | mus_musculus |       |             |       |          |
| 11 | 72855836 | rs233738703              | G                 | GATATATATAT        | Zzefl    | Reg variation    | mus_musculus |       |             |       |          |
| 11 | 72877783 | rs228633035; rs220233865 | C                 | CT                 | Zzefl    | Reg variation    | mus_musculus |       |             |       |          |
| 11 | 72877854 | rs264818808              | AT                | A                  | Zzefl    | Reg variation    | mus_musculus |       |             |       |          |
| 11 | 72880776 | rs264122049; rs252532956 | CA                | C                  | Zzefl    | Reg variation    | mus_musculus |       |             |       |          |
| 11 | 72907810 | rs219925323              | TA                | T                  | Zzefl    | Reg variation    | mus_musculus |       |             |       |          |
| 11 | 72918717 | .                        | AG                | A                  | Zzefl    | Reg variation    | mus_musculus |       |             |       |          |
| 11 | 72919691 | .                        | CT                | C                  | Zzefl    | Reg variation    | mus_musculus |       |             |       |          |
| 11 | 72925810 | .                        | TAA               | T                  | Zzefl    | Reg variation    | mus_musculus |       |             |       |          |
| 11 | 72796741 | rs26887783               | C                 | T                  | Zzefl    | Reg variation    | mus_musculus |       |             |       |          |
| 11 | 72796809 | rs262621733              | T                 | A                  | Zzefl    | Reg variation    | mus_musculus |       |             |       |          |
| 11 | 72797142 | rs259153599              | C                 | T                  | Zzefl    | Reg variation    | mus_musculus |       |             |       |          |
| 11 | 72797148 | rs26887782               | T                 | G                  | Zzefl    | Reg variation    | mus_musculus |       |             |       |          |
| 11 | 72797189 | rs265255998              | G                 | T                  | Zzefl    | Reg variation    | mus_musculus |       |             |       |          |
| 11 | 72797193 | rs229673168              | G                 | T                  | Zzefl    | Reg variation    | mus_musculus |       |             |       |          |
| 11 | 72797197 | rs48157493               | G                 | T                  | Zzefl    | Reg variation    | mus_musculus |       |             |       |          |
| 11 | 72797206 | rs107904807              | T                 | A                  | Zzefl    | Reg variation    | mus_musculus |       |             |       |          |
| 11 | 72797229 | rs50658949               | A                 | G                  | Zzefl    | Reg variation    | mus_musculus |       |             |       |          |
| 11 | 72797333 | rs46966533               | C                 | G                  | Zzefl    | Reg variation    | mus_musculus |       |             |       |          |
| 11 | 72797492 | rs29386646               | C                 | T                  | Zzefl    | Reg variation    | mus_musculus |       |             |       |          |
| 11 | 72797593 | rs29451657               | A                 | C                  | Zzefl    | Reg variation    | mus_musculus |       |             |       |          |
| 11 | 72797651 | rs26887781               | C                 | T                  | Zzefl    | Reg variation    | mus_musculus |       |             |       |          |
| 11 | 72797772 | rs29432502               | G                 | A                  | Zzefl    | Reg variation    | mus_musculus |       |             |       |          |
| 11 | 72798545 | rs51469152               | C                 | T                  | Zzefl    | Reg variation    | mus_musculus |       |             |       |          |
| 11 | 72798579 | rs51182407               | G                 | A                  | Zzefl    | Reg variation    | mus_musculus |       |             |       |          |
| 11 | 72798598 | rs29389180               | C                 | A                  | Zzefl    | Reg variation    | mus_musculus |       |             |       |          |
| 11 | 72798631 | rs51664067               | A                 | G                  | Zzefl    | Reg variation    | mus_musculus |       |             |       |          |
| 11 | 72798728 | rs52082431               | C                 | T                  | Zzefl    | Reg variation    | mus_musculus |       |             |       |          |
| 11 | 72798853 | rs48779098               | C                 | T                  | Zzefl    | Reg variation    | mus_musculus |       |             |       |          |

|    |          |             |   |   |       |               |              |  |  |  |  |
|----|----------|-------------|---|---|-------|---------------|--------------|--|--|--|--|
| 11 | 72798884 | rs46819162  | C | T | Zzefl | Reg variation | mus_musculus |  |  |  |  |
| 11 | 72798905 | rs228469973 | T | C | Zzefl | Reg variation | mus_musculus |  |  |  |  |
| 11 | 72798918 | rs585568675 | G | A | Zzefl | Reg variation | mus_musculus |  |  |  |  |
| 11 | 72798933 | rs252622005 | T | C | Zzefl | Reg variation | mus_musculus |  |  |  |  |
| 11 | 72798972 | rs234971930 | G | A | Zzefl | Reg variation | mus_musculus |  |  |  |  |
| 11 | 72799051 | rs234364253 | G | T | Zzefl | Reg variation | mus_musculus |  |  |  |  |
| 11 | 72799342 | rs47227453  | G | A | Zzefl | Reg variation | mus_musculus |  |  |  |  |
| 11 | 72799366 | rs49803165  | G | A | Zzefl | Reg variation | mus_musculus |  |  |  |  |
| 11 | 72799374 | rs48987929  | C | T | Zzefl | Reg variation | mus_musculus |  |  |  |  |
| 11 | 72799450 | rs50202451  | A | T | Zzefl | Reg variation | mus_musculus |  |  |  |  |
| 11 | 72799545 | rs29471432  | A | G | Zzefl | Reg variation | mus_musculus |  |  |  |  |
| 11 | 72799749 | rs29481727  | A | C | Zzefl | Reg variation | mus_musculus |  |  |  |  |
| 11 | 72799800 | rs29408216  | A | G | Zzefl | Reg variation | mus_musculus |  |  |  |  |
| 11 | 72799815 | rs29437118  | T | G | Zzefl | Reg variation | mus_musculus |  |  |  |  |
| 11 | 72799945 | rs29402140  | G | A | Zzefl | Reg variation | mus_musculus |  |  |  |  |
| 11 | 72800091 | rs29457223  | T | C | Zzefl | Reg variation | mus_musculus |  |  |  |  |
| 11 | 72800105 | rs29426393  | C | T | Zzefl | Reg variation | mus_musculus |  |  |  |  |
| 11 | 72800268 | rs49176047  | T | C | Zzefl | Reg variation | mus_musculus |  |  |  |  |
| 11 | 72800770 | rs29474900  | C | A | Zzefl | Reg variation | mus_musculus |  |  |  |  |
| 11 | 72800863 | rs29395785  | T | C | Zzefl | Reg variation | mus_musculus |  |  |  |  |
| 11 | 72801490 | rs29457275  | T | C | Zzefl | Reg variation | mus_musculus |  |  |  |  |
| 11 | 72801520 | rs29399967  | C | A | Zzefl | Reg variation | mus_musculus |  |  |  |  |
| 11 | 72801577 | rs46777365  | G | A | Zzefl | Reg variation | mus_musculus |  |  |  |  |
| 11 | 72801578 | rs108344814 | A | T | Zzefl | Reg variation | mus_musculus |  |  |  |  |
| 11 | 72801774 | rs50597463  | G | T | Zzefl | Reg variation | mus_musculus |  |  |  |  |
| 11 | 72802266 | rs211935985 | G | A | Zzefl | Reg variation | mus_musculus |  |  |  |  |
| 11 | 72802601 | rs26887778  | A | C | Zzefl | Reg variation | mus_musculus |  |  |  |  |
| 11 | 72803276 | rs29393576  | C | G | Zzefl | Reg variation | mus_musculus |  |  |  |  |
| 11 | 72803297 | rs51170919  | A | C | Zzefl | Reg variation | mus_musculus |  |  |  |  |
| 11 | 72803323 | rs29448215  | T | C | Zzefl | Reg variation | mus_musculus |  |  |  |  |
| 11 | 72804303 | rs26887775  | C | G | Zzefl | Reg variation | mus_musculus |  |  |  |  |
| 11 | 72804504 | rs216869979 | G | A | Zzefl | Reg variation | mus_musculus |  |  |  |  |
| 11 | 72804734 | rs29438430  | T | C | Zzefl | Reg variation | mus_musculus |  |  |  |  |
| 11 | 72804859 | rs29412262  | T | C | Zzefl | Reg variation | mus_musculus |  |  |  |  |
| 11 | 72804917 | rs48217433  | G | A | Zzefl | Reg variation | mus_musculus |  |  |  |  |
| 11 | 72804918 | rs47120021  | A | C | Zzefl | Reg variation | mus_musculus |  |  |  |  |
| 11 | 72805095 | rs29418040  | A | G | Zzefl | Reg variation | mus_musculus |  |  |  |  |
| 11 | 72805208 | rs29383000  | T | C | Zzefl | Reg variation | mus_musculus |  |  |  |  |
| 11 | 72829638 | rs29479495  | T | C | Zzefl | Reg variation | mus_musculus |  |  |  |  |
| 11 | 72830480 | rs26887713  | G | A | Zzefl | Reg variation | mus_musculus |  |  |  |  |
| 11 | 72830830 | rs26887711  | T | C | Zzefl | Reg variation | mus_musculus |  |  |  |  |
| 11 | 72830943 | rs26887709  | G | A | Zzefl | Reg variation | mus_musculus |  |  |  |  |
| 11 | 72832775 | rs52072567  | C | T | Zzefl | Reg variation | mus_musculus |  |  |  |  |
| 11 | 72832996 | .           | C | T | Zzefl | Reg variation | mus_musculus |  |  |  |  |
| 11 | 72835463 | rs26887700  | G | A | Zzefl | Reg variation | mus_musculus |  |  |  |  |
| 11 | 72835993 | rs29384846  | C | T | Zzefl | Reg variation | mus_musculus |  |  |  |  |
| 11 | 72836104 | rs29404909  | A | C | Zzefl | Reg variation | mus_musculus |  |  |  |  |
| 11 | 72836115 | rs29399824  | A | G | Zzefl | Reg variation | mus_musculus |  |  |  |  |
| 11 | 72837148 | rs585732782 | T | G | Zzefl | Reg variation | mus_musculus |  |  |  |  |
| 11 | 72837567 | rs232597186 | A | G | Zzefl | Reg variation | mus_musculus |  |  |  |  |
| 11 | 72838062 | rs29404334  | T | C | Zzefl | Reg variation | mus_musculus |  |  |  |  |
| 11 | 72838156 | rs242851297 | T | C | Zzefl | Reg variation | mus_musculus |  |  |  |  |
| 11 | 72838975 | rs237531547 | A | T | Zzefl | Reg variation | mus_musculus |  |  |  |  |
| 11 | 72840372 | rs29391963  | G | T | Zzefl | Reg variation | mus_musculus |  |  |  |  |

|    |           |             |     |      |       |                                    |              |    |    |    |    |
|----|-----------|-------------|-----|------|-------|------------------------------------|--------------|----|----|----|----|
| 11 | 72841083  | rs29485912  | T   | C    | Zzef1 | Reg variation                      | mus_musculus |    |    |    |    |
| 11 | 72841530  | rs29397106  | C   | T    | Zzef1 | Reg variation                      | mus_musculus |    |    |    |    |
| 11 | 72853116  | rs45668944  | G   | A    | Zzef1 | Reg variation                      | mus_musculus |    |    |    |    |
| 11 | 72853276  | rs46567539  | A   | G    | Zzef1 | Reg variation                      | mus_musculus |    |    |    |    |
| 11 | 72854586  | rs52385696  | C   | T    | Zzef1 | Reg variation                      | mus_musculus |    |    |    |    |
| 11 | 72881503  | rs29444382  | G   | A    | Zzef1 | Reg variation                      | mus_musculus |    |    |    |    |
| 11 | 72909048  | .           | G   | A    | Zzef1 | Reg variation                      | mus_musculus |    |    |    |    |
| 11 | 72909706  | .           | T   | A    | Zzef1 | Reg variation                      | mus_musculus |    |    |    |    |
| 11 | 72910448  | .           | G   | C    | Zzef1 | Reg variation                      | mus_musculus |    |    |    |    |
| 11 | 72910557  | .           | A   | G    | Zzef1 | Reg variation                      | mus_musculus |    |    |    |    |
| 11 | 72916798  | .           | C   | T    | Zzef1 | Reg variation                      | mus_musculus |    |    |    |    |
| 11 | 72920708  | .           | A   | G    | Zzef1 | Reg variation                      | mus_musculus |    |    |    |    |
| 11 | 72927040  | .           | G   | A    | Zzef1 | Reg variation                      | mus_musculus |    |    |    |    |
| 11 | 72925810  | .           | TAA | T    | Zzef1 | UTR variation                      | mus_musculus |    |    |    |    |
| 11 | 72927040  | .           | G   | A    | Zzef1 | UTR variation                      | mus_musculus |    |    |    |    |
| 11 | 17396930  | rs757110    | C   | A, T | ABCC8 | missense_variant                   | homo sapiens | -- | -- | -- | -- |
| 11 | 17387083  | rs5215      | C   | T    | ABCC8 | missense_variant                   | homo sapiens | -- | -- | -- | -- |
| 11 | 17396930  | rs757110    | C   | A, T | ABCC8 | 3_prime_UTR_variant                | homo sapiens |    |    |    |    |
| 11 | 17393643  | rs4148646   | C   | G    | ABCC8 | upstream_gene_variant              | homo sapiens |    |    |    |    |
| 11 | 17393643  | rs4148646   | C   | G    | ABCC8 | intron_variant                     | homo sapiens |    |    |    |    |
| 11 | 17396930  | rs757110    | C   | A, T | ABCC8 | downstream_gene_variant            | homo sapiens |    |    |    |    |
| 11 | 17396930  | rs757110    | C   | A, T | ABCC8 | NMD_transcript_variant             | homo sapiens |    |    |    |    |
| 11 | 17387083  | rs5215      | C   | T    | ABCC8 | downstream_gene_variant            | homo sapiens |    |    |    |    |
| 11 | 17390274  | rs2074314   | C   | T    | ABCC8 | downstream_gene_variant            | homo sapiens |    |    |    |    |
| 11 | 17393643  | rs4148646   | C   | G    | ABCC8 | downstream_gene_variant            | homo sapiens |    |    |    |    |
| 11 | 17393643  | rs4148646   | C   | G    | ABCC8 | NMD_transcript_variant             | homo sapiens |    |    |    |    |
| 11 | 17387083  | rs5215      | C   | T    | ABCC8 | upstream_gene_variant              | homo sapiens |    |    |    |    |
| 11 | 17393643  | rs4148646   | C   | G    | ABCC8 | non_coding_transcript_variant      | homo sapiens |    |    |    |    |
| 11 | 17396930  | rs757110    | C   | A, T | ABCC8 | intron_variant                     | homo sapiens |    |    |    |    |
| 11 | 17396930  | rs757110    | C   | A, T | ABCC8 | non_coding_transcript_exon_variant | homo sapiens |    |    |    |    |
| 11 | 17390274  | rs2074314   | C   | T    | ABCC8 | upstream_gene_variant              | homo sapiens |    |    |    |    |
| 11 | 17396930  | rs757110    | C   | A, T | ABCC8 | upstream_gene_variant              | homo sapiens |    |    |    |    |
| 11 | 69638276  | rs144245804 | G   | A, C | CCND1 | upstream_gene_variant              | homo sapiens |    |    |    |    |
| 11 | 69647874  | rs602652    | G   | A, C | CCND1 | intron_variant                     | homo sapiens |    |    |    |    |
| 11 | 69647874  | rs602652    | G   | A, C | CCND1 | downstream_gene_variant            | homo sapiens |    |    |    |    |
| 11 | 69648505  | rs3918298   | G   | A    | CCND1 | non_coding_transcript_variant      | homo sapiens |    |    |    |    |
| 11 | 69648505  | rs3918298   | G   | A    | CCND1 | intron_variant                     | homo sapiens |    |    |    |    |
| 11 | 69648505  | rs3918298   | G   | A    | CCND1 | downstream_gene_variant            | homo sapiens |    |    |    |    |
| 11 | 69643662  | rs55816909  | G   | C    | CCND1 | intron_variant                     | homo sapiens |    |    |    |    |
| 11 | 69647874  | rs602652    | G   | A, C | CCND1 | non_coding_transcript_variant      | homo sapiens |    |    |    |    |
| 11 | 69643662  | rs55816909  | G   | C    | CCND1 | non_coding_transcript_variant      | homo sapiens |    |    |    |    |
| 11 | 69229758  | rs61881115  | G   | A    | CCND1 |                                    | homo sapiens |    |    |    |    |
| 11 | 69647874  | rs602652    | G   | A, C | CCND1 | upstream_gene_variant              | homo sapiens |    |    |    |    |
| 11 | 69643662  | rs55816909  | G   | C    | CCND1 | upstream_gene_variant              | homo sapiens |    |    |    |    |
| 11 | 69643662  | rs55816909  | G   | C    | CCND1 | downstream_gene_variant            | homo sapiens |    |    |    |    |
| 11 | 69633990  | rs11820019  | T   | C    | CCND1 |                                    | homo sapiens |    |    |    |    |
| 11 | 45890462  | rs7115753   | A   | G    | CRY2  | intron_variant                     | homo sapiens |    |    |    |    |
| 11 | 45837033  | rs12419690  | G   | A, T | CRY2  |                                    | homo sapiens |    |    |    |    |
| 11 | 45824947  | rs11038672  | C   | G, T | CRY2  |                                    | homo sapiens |    |    |    |    |
| 11 | 117822540 | rs529623    | T   | C    | FXVD6 | intron_variant                     | homo sapiens |    |    |    |    |
| 11 | 117822540 | rs529623    | T   | C    | FXVD6 | non_coding_transcript_exon_variant | homo sapiens |    |    |    |    |
| 11 | 117822540 | rs529623    | T   | C    | FXVD6 | non_coding_transcript_variant      | homo sapiens |    |    |    |    |
| 11 | 117822540 | rs529623    | T   | C    | FXVD6 | upstream_gene_variant              | homo sapiens |    |    |    |    |
| 11 | 2176056   | rs4929965   | A   | G    | INS   | upstream_gene_variant              | homo sapiens |    |    |    |    |



|    |           |             |   |         |        |                                    |              |    |    |    |    |
|----|-----------|-------------|---|---------|--------|------------------------------------|--------------|----|----|----|----|
| 11 | 2161289   | rs571342427 | T | C       | INS    | upstream_gene_variant              | homo sapiens |    |    |    |    |
| 11 | 2130531   | rs555759341 | G | A, C, T | INS    | downstream_gene_variant            | homo sapiens |    |    |    |    |
| 11 | 2097630   | rs11042596  | T | G       | INS    |                                    | homo sapiens |    |    |    |    |
| 11 | 2130531   | rs555759341 | G | A, C, T | INS    | 3_prime_UTR_variant                | homo sapiens |    |    |    |    |
| 11 | 2161289   | rs571342427 | T | C       | INS    | downstream_gene_variant            | homo sapiens |    |    |    |    |
| 11 | 2176056   | rs4929965   | A | G       | INS    | downstream_gene_variant            | homo sapiens |    |    |    |    |
| 11 | 2185703   | rs12277475  | C | T       | INS    |                                    | homo sapiens |    |    |    |    |
| 11 | 2166212   | rs4072825   | C | A       | INS    | intron_variant                     | homo sapiens |    |    |    |    |
| 11 | 2166212   | rs4072825   | C | A       | INS    | NMD_transcript_variant             | homo sapiens |    |    |    |    |
| 11 | 2166212   | rs4072825   | C | A       | INS    | non_coding_transcript_variant      | homo sapiens |    |    |    |    |
| 11 | 2166212   | rs4072825   | C | A       | INS    | upstream_gene_variant              | homo sapiens |    |    |    |    |
| 11 | 2181924   | rs11043003  | T | C       | INS    |                                    | homo sapiens |    |    |    |    |
| 11 | 2166212   | rs4072825   | C | A       | INS    | downstream_gene_variant            | homo sapiens |    |    |    |    |
| 11 | 1683366   | rs12802972  | G | A       | INS    |                                    | homo sapiens |    |    |    |    |
| 11 | 2166212   | rs4072825   | C | A       | INS    | non_coding_transcript_exon_variant | homo sapiens |    |    |    |    |
| 12 | 4297115   | rs12299509  | A | G, T    | CCND2  | NMD_transcript_variant             | homo sapiens |    |    |    |    |
| 12 | 4275530   | rs3217792   | C | A, T    | CCND2  | upstream_gene_variant              | homo sapiens |    |    |    |    |
| 12 | 4275678   | rs76895963  | T | G       | CCND2  | intron_variant                     | homo sapiens |    |    |    |    |
| 12 | 4275530   | rs3217792   | C | A, T    | CCND2  | intron_variant                     | homo sapiens |    |    |    |    |
| 12 | 3921938   | rs10848958  | C | T       | CCND2  |                                    | homo sapiens |    |    |    |    |
| 12 | 4191006   | rs11063028  | T | C       | CCND2  |                                    | homo sapiens |    |    |    |    |
| 12 | 4275530   | rs3217792   | C | A, T    | CCND2  | non_coding_transcript_variant      | homo sapiens |    |    |    |    |
| 12 | 4297115   | rs12299509  | A | G, T    | CCND2  | intron_variant                     | homo sapiens |    |    |    |    |
| 12 | 4289884   | rs3217860   | A | G       | CCND2  | intron_variant                     | homo sapiens |    |    |    |    |
| 12 | 4297115   | rs12299509  | A | G, T    | CCND2  | non_coding_transcript_variant      | homo sapiens |    |    |    |    |
| 12 | 4275530   | rs3217792   | C | A, T    | CCND2  | NMD_transcript_variant             | homo sapiens |    |    |    |    |
| 12 | 4275678   | rs76895963  | T | G       | CCND2  | NMD_transcript_variant             | homo sapiens |    |    |    |    |
| 12 | 4275678   | rs76895963  | T | G       | CCND2  | upstream_gene_variant              | homo sapiens |    |    |    |    |
| 12 | 4275678   | rs76895963  | T | G       | CCND2  | non_coding_transcript_variant      | homo sapiens |    |    |    |    |
| 12 | 4289884   | rs3217860   | A | G       | CCND2  | downstream_gene_variant            | homo sapiens |    |    |    |    |
| 12 | 4272815   | rs7304270   | C | T       | CCND2  | upstream_gene_variant              | homo sapiens |    |    |    |    |
| 12 | 4265207   | rs11063069  | A | G       | CCND2  | upstream_gene_variant              | homo sapiens |    |    |    |    |
| 12 | 4272815   | rs7304270   | C | T       | CCND2  | intron_variant                     | homo sapiens |    |    |    |    |
| 12 | 4266923   | rs4238013   | C | T       | CCND2  | upstream_gene_variant              | homo sapiens |    |    |    |    |
| 12 | 4289884   | rs3217860   | A | G       | CCND2  | NMD_transcript_variant             | homo sapiens |    |    |    |    |
| 12 | 4289884   | rs3217860   | A | G       | CCND2  | non_coding_transcript_variant      | homo sapiens |    |    |    |    |
| 12 | 120978847 | rs1169288   | A | C, T    | HNFI1A | NMD_transcript_variant             | homo sapiens |    |    |    |    |
| 12 | 120978847 | rs1169288   | A | C, T    | HNFI1A | missense_variant                   | homo sapiens | -- | -- | -- | -- |
| 12 | 120965129 | rs7305618   | C | T       | HNFI1A | downstream_gene_variant            | homo sapiens |    |    |    |    |
| 12 | 120994314 | rs56348580  | G | C       | HNFI1A | missense_variant                   | homo sapiens | -- | -- | -- | -- |
| 12 | 120994314 | rs56348580  | G | C       | HNFI1A | upstream_gene_variant              | homo sapiens |    |    |    |    |
| 12 | 120890006 | rs187150787 | G | A       | HNFI1A | intron_variant                     | homo sapiens |    |    |    |    |
| 12 | 120979061 | rs1800574   | C | T       | HNFI1A | NMD_transcript_variant             | homo sapiens |    |    |    |    |
| 12 | 120860012 | rs11065299  | G | A       | HNFI1A | intron_variant                     | homo sapiens |    |    |    |    |
| 12 | 121444592 | rs73224262  | C | T       | HNFI1A | NMD_transcript_variant             | homo sapiens |    |    |    |    |
| 12 | 120979061 | rs1800574   | C | T       | HNFI1A | missense_variant                   | homo sapiens | -- | -- | -- | -- |
| 12 | 120978847 | rs1169288   | A | C, T    | HNFI1A | non_coding_transcript_exon_variant | homo sapiens |    |    |    |    |
| 12 | 120994496 | rs55783344  | C | T       | HNFI1A | upstream_gene_variant              | homo sapiens |    |    |    |    |
| 12 | 120978847 | rs1169288   | A | C, T    | HNFI1A | non_coding_transcript_variant      | homo sapiens |    |    |    |    |
| 12 | 120994314 | rs56348580  | G | C       | HNFI1A | NMD_transcript_variant             | homo sapiens |    |    |    |    |
| 12 | 120978847 | rs1169288   | A | C, T    | HNFI1A | intron_variant                     | homo sapiens |    |    |    |    |
| 12 | 120994314 | rs56348580  | G | C       | HNFI1A | intron_variant                     | homo sapiens |    |    |    |    |
| 12 | 120925703 | rs118074491 | A | C, G    | HNFI1A |                                    | homo sapiens |    |    |    |    |
| 12 | 120989098 | rs12427353  | G | A, C, T | HNFI1A | NMD_transcript_variant             | homo sapiens |    |    |    |    |

|    |           |                          |                   |           |               |                                    |              |       |         |       |           |
|----|-----------|--------------------------|-------------------|-----------|---------------|------------------------------------|--------------|-------|---------|-------|-----------|
| 12 | 120994496 | rs55783344               | C                 | T         | <i>HNFI1A</i> | NMD_transcript_variant             | homo sapiens |       |         |       |           |
| 12 | 120994496 | rs55783344               | C                 | T         | <i>HNFI1A</i> | non_coding_transcript_variant      | homo sapiens |       |         |       |           |
| 12 | 120989098 | rs12427353               | G                 | A, C, T   | <i>HNFI1A</i> | intron_variant                     | homo sapiens |       |         |       |           |
| 12 | 120978847 | rs1169288                | A                 | C, T      | <i>HNFI1A</i> | splice_region_variant              | homo sapiens |       |         |       |           |
| 12 | 121022883 | rs7957197                | T                 | A         | <i>HNFI1A</i> | non_coding_transcript_variant      | homo sapiens |       |         |       |           |
| 12 | 120942738 | rs73226260               | G                 | A         | <i>HNFI1A</i> |                                    | homo sapiens |       |         |       |           |
| 12 | 120989098 | rs12427353               | G                 | A, C, T   | <i>HNFI1A</i> | non_coding_transcript_variant      | homo sapiens |       |         |       |           |
| 12 | 120994496 | rs55783344               | C                 | T         | <i>HNFI1A</i> | intron_variant                     | homo sapiens |       |         |       |           |
| 12 | 121022883 | rs7957197                | T                 | A         | <i>HNFI1A</i> | NMD_transcript_variant             | homo sapiens |       |         |       |           |
| 12 | 120994314 | rs56348580               | G                 | C         | <i>HNFI1A</i> | 3_prime_UTR_variant                | homo sapiens |       |         |       |           |
| 12 | 120991391 | rs1169299                | T                 | C         | <i>HNFI1A</i> | intron_variant                     | homo sapiens |       |         |       |           |
| 12 | 121063658 | rs28638142               | C                 | A         | <i>HNFI1A</i> | upstream_gene_variant              | homo sapiens |       |         |       |           |
| 12 | 120979061 | rs1800574                | C                 | T         | <i>HNFI1A</i> | non_coding_transcript_variant      | homo sapiens |       |         |       |           |
| 12 | 120991391 | rs1169299                | T                 | C         | <i>HNFI1A</i> | NMD_transcript_variant             | homo sapiens |       |         |       |           |
| 12 | 120994314 | rs56348580               | G                 | C         | <i>HNFI1A</i> | non_coding_transcript_variant      | homo sapiens |       |         |       |           |
| 12 | 121444592 | rs73224262               | C                 | T         | <i>HNFI1A</i> | upstream_gene_variant              | homo sapiens |       |         |       |           |
| 12 | 120991391 | rs1169299                | T                 | C         | <i>HNFI1A</i> | non_coding_transcript_variant      | homo sapiens |       |         |       |           |
| 12 | 121022883 | rs7957197                | T                 | A         | <i>HNFI1A</i> | intron_variant                     | homo sapiens |       |         |       |           |
| 12 | 121444592 | rs73224262               | C                 | T         | <i>HNFI1A</i> | non_coding_transcript_exon_variant | homo sapiens |       |         |       |           |
| 12 | 121444592 | rs73224262               | C                 | T         | <i>HNFI1A</i> | non_coding_transcript_variant      | homo sapiens |       |         |       |           |
| 12 | 120994314 | rs56348580               | G                 | C         | <i>HNFI1A</i> | synonymous_variant                 | homo sapiens |       |         |       |           |
| 12 | 120979061 | rs1800574                | C                 | T         | <i>HNFI1A</i> | non_coding_transcript_exon_variant | homo sapiens |       |         |       |           |
| 12 | 121022883 | rs7957197                | T                 | A         | <i>HNFI1A</i> | downstream_gene_variant            | homo sapiens |       |         |       |           |
| 12 | 120991391 | rs1169299                | T                 | C         | <i>HNFI1A</i> | upstream_gene_variant              | homo sapiens |       |         |       |           |
| 12 | 121444592 | rs73224262               | C                 | T         | <i>HNFI1A</i> | intron_variant                     | homo sapiens |       |         |       |           |
| 12 | 120994314 | rs56348580               | G                 | C         | <i>HNFI1A</i> | non_coding_transcript_exon_variant | homo sapiens |       |         |       |           |
| 12 | 120979061 | rs1800574                | C                 | T         | <i>HNFI1A</i> | intron_variant                     | homo sapiens |       |         |       |           |
| 13 | 117219276 | rs234474940              | TATAATA           | T         | <i>Emb</i>    | Reg variation                      | mus_musculus |       |         |       |           |
| 13 | 117225480 | rs247591776              | T                 | TTCC      | <i>Emb</i>    | Reg variation                      | mus_musculus |       |         |       |           |
| 13 | 117216596 | rs29582756               | G                 | A         | <i>Emb</i>    | Reg variation                      | mus_musculus |       |         |       |           |
| 13 | 117218511 | rs29631200               | C                 | T         | <i>Emb</i>    | Reg variation                      | mus_musculus |       |         |       |           |
| 13 | 117219276 | rs234474940              | TATAATA           | T         | <i>Emb</i>    | UTR variation                      | mus_musculus |       |         |       |           |
| 13 | 55315983  | rs29636332               | C                 | T         | <i>Nsdl</i>   | Reg variation                      | mus_musculus |       |         |       |           |
| 13 | 55315983  | rs29636332               | C                 | T         | <i>Nsdl</i>   | UTR variation                      | mus_musculus |       |         |       |           |
| 13 | 96396697  | rs30388453               | G                 | A         | <i>Poc5</i>   | missense_variant                   | mus_musculus | -0.17 | Neutral | 0.178 | Tolerated |
| 13 | 96386441  | rs214975415              | G                 | GCT       | <i>Poc5</i>   | Reg variation                      | mus_musculus |       |         |       |           |
| 13 | 96387116  | rs254994236              | CCACACACACACACACA | C         | <i>Poc5</i>   | Reg variation                      | mus_musculus |       |         |       |           |
| 13 | 96411820  | .                        | C                 | CTCTTTCTT | <i>Poc5</i>   | Reg variation                      | mus_musculus |       |         |       |           |
| 13 | 96411914  | rs226315962              | T                 | TTC       | <i>Poc5</i>   | Reg variation                      | mus_musculus |       |         |       |           |
| 13 | 96414267  | rs246195016; rs387128637 | GA                | G         | <i>Poc5</i>   | Reg variation                      | mus_musculus |       |         |       |           |
| 13 | 96386414  | rs30392325               | T                 | C         | <i>Poc5</i>   | Reg variation                      | mus_musculus |       |         |       |           |
| 13 | 96388063  | rs30391283               | A                 | G         | <i>Poc5</i>   | Reg variation                      | mus_musculus |       |         |       |           |
| 13 | 96411549  | rs49798947               | A                 | G         | <i>Poc5</i>   | Reg variation                      | mus_musculus |       |         |       |           |
| 13 | 96411853  | rs585121310              | T                 | C         | <i>Poc5</i>   | Reg variation                      | mus_musculus |       |         |       |           |
| 13 | 96412564  | rs46113452               | G                 | C         | <i>Poc5</i>   | Reg variation                      | mus_musculus |       |         |       |           |
| 13 | 96412997  | rs30388000               | A                 | C         | <i>Poc5</i>   | Reg variation                      | mus_musculus |       |         |       |           |
| 13 | 96413299  | rs29736697               | T                 | A         | <i>Poc5</i>   | Reg variation                      | mus_musculus |       |         |       |           |
| 13 | 96414136  | rs30070719               | T                 | C         | <i>Poc5</i>   | Reg variation                      | mus_musculus |       |         |       |           |
| 13 | 96416154  | rs30059613               | T                 | A         | <i>Poc5</i>   | Reg variation                      | mus_musculus |       |         |       |           |
| 13 | 96388414  | rs30098056               | A                 | G         | <i>Poc5</i>   | UTR variation                      | mus_musculus |       |         |       |           |
| 13 | 96388474  | rs29538283               | A                 | G         | <i>Poc5</i>   | UTR variation                      | mus_musculus |       |         |       |           |
| 13 | 96390337  | rs30391278               | T                 | C         | <i>Poc5</i>   | UTR variation                      | mus_musculus |       |         |       |           |
| 13 | 96390347  | rs30391277               | T                 | C         | <i>Poc5</i>   | UTR variation                      | mus_musculus |       |         |       |           |
| 13 | 30462505  | rs3742305                | C                 | G         | <i>HMGB1</i>  | non_coding_transcript_exon_variant | homo sapiens |       |         |       |           |

|    |          |                                       |                |        |        |                         |              |       |         |      |           |
|----|----------|---------------------------------------|----------------|--------|--------|-------------------------|--------------|-------|---------|------|-----------|
| 13 | 30468315 | rs11842871                            | G              | T      | HMGB1  | intron_variant          | homo sapiens |       |         |      |           |
| 13 | 30462505 | rs3742305                             | C              | G      | HMGB1  | downstream_gene_variant | homo sapiens |       |         |      |           |
| 13 | 30443131 | rs12856169                            | G              | A, C   | HMGB1  |                         | homo sapiens |       |         |      |           |
| 13 | 30462505 | rs3742305                             | C              | G      | HMGB1  | intron_variant          | homo sapiens |       |         |      |           |
| 13 | 30468315 | rs11842871                            | G              | T      | HMGB1  | upstream_gene_variant   | homo sapiens |       |         |      |           |
| 13 | 45312051 | rs79490558                            | C              | A      | TPT1   |                         | homo sapiens |       |         |      |           |
| 14 | 20263312 | rs48703603                            | G              | A      | Kcnk16 | missense_variant        | mus_musculus | -0.35 | Neutral | 0.06 | Tolerated |
| 14 | 20261446 | rs263399431                           | TC             | T      | Kcnk16 | Reg variation           | mus_musculus |       |         |      |           |
| 14 | 20270164 | rs229382334                           | TGGGCTAGAGCAC  | T      | Kcnk16 | Reg variation           | mus_musculus |       |         |      |           |
| 14 | 20261662 | rs48640491                            | A              | G      | Kcnk16 | Reg variation           | mus_musculus |       |         |      |           |
| 14 | 20269442 | rs50061523                            | G              | A      | Kcnk16 | Reg variation           | mus_musculus |       |         |      |           |
| 14 | 20270705 | rs256655285                           | T              | C      | Kcnk16 | Reg variation           | mus_musculus |       |         |      |           |
| 14 | 75846169 | rs52314573                            | C              | T      | Tpt1   | Reg variation           | mus_musculus |       |         |      |           |
| 15 | 62102065 | rs8037894                             | G              | C, T   | C2CD4B |                         | homo sapiens |       |         |      |           |
| 15 | 62112183 | rs1436955                             | C              | T      | C2CD4B |                         | homo sapiens |       |         |      |           |
| 15 | 62103990 | rs7167878                             | C              | A      | C2CD4B |                         | homo sapiens |       |         |      |           |
| 15 | 62099409 | rs7163757                             | C              | T      | C2CD4B |                         | homo sapiens |       |         |      |           |
| 15 | 62104190 | rs7172432                             | A              | G      | C2CD4B |                         | homo sapiens |       |         |      |           |
| 15 | 62121815 | rs1436953                             | C              | T      | C2CD4B |                         | homo sapiens |       |         |      |           |
| 15 | 62116871 | rs8032416                             | G              | A, C   | C2CD4B |                         | homo sapiens |       |         |      |           |
| 16 | 73896792 | rs226739163; rs223688549              | C              | CT     | Robo2  | Reg variation           | mus_musculus |       |         |      |           |
| 16 | 73907786 | rs387863521; rs253681084              | TA             | T      | Robo2  | Reg variation           | mus_musculus |       |         |      |           |
| 16 | 73919294 | rs219845038                           | TATCC          | T      | Robo2  | Reg variation           | mus_musculus |       |         |      |           |
| 16 | 73934183 | rs262173350                           | C              | CAA    | Robo2  | Reg variation           | mus_musculus |       |         |      |           |
| 16 | 73934510 | rs222755137; rs386881783              | TG             | T      | Robo2  | Reg variation           | mus_musculus |       |         |      |           |
| 16 | 73970465 | .                                     | GCACA          | GCA, G | Robo2  | Reg variation           | mus_musculus |       |         |      |           |
| 16 | 73980591 | rs254244704; rs222296960              | C              | CA     | Robo2  | Reg variation           | mus_musculus |       |         |      |           |
| 16 | 73981084 | rs233835739                           | A              | AAG    | Robo2  | Reg variation           | mus_musculus |       |         |      |           |
| 16 | 73981399 | rs215733390                           | C              | CA     | Robo2  | Reg variation           | mus_musculus |       |         |      |           |
| 16 | 74028870 | rs265867644                           | TAAA           | T      | Robo2  | Reg variation           | mus_musculus |       |         |      |           |
| 16 | 74029073 | rs238637794                           | TG             | T      | Robo2  | Reg variation           | mus_musculus |       |         |      |           |
| 16 | 74029561 | rs266146410                           | ACAAAAAAC      | A      | Robo2  | Reg variation           | mus_musculus |       |         |      |           |
| 16 | 74030375 | rs218326536                           | T              | TCC    | Robo2  | Reg variation           | mus_musculus |       |         |      |           |
| 16 | 74030486 | rs387109541; rs223294256; rs253739854 | GA             | G      | Robo2  | Reg variation           | mus_musculus |       |         |      |           |
| 16 | 74030999 | rs235478051                           | G              | GA     | Robo2  | Reg variation           | mus_musculus |       |         |      |           |
| 16 | 74031278 | rs220731967                           | CT             | C      | Robo2  | Reg variation           | mus_musculus |       |         |      |           |
| 16 | 74031970 | rs238116616; rs386962013              | TTAAAAAAA      | TA, T  | Robo2  | Reg variation           | mus_musculus |       |         |      |           |
| 16 | 74040032 | rs387794004; rs220633160              | TGTGTGTGTGTGTG | T      | Robo2  | Reg variation           | mus_musculus |       |         |      |           |
| 16 | 74042432 | rs257911913; rs220346400              | C              | CA     | Robo2  | Reg variation           | mus_musculus |       |         |      |           |
| 16 | 74042519 | rs387637378                           | TATGG          | T      | Robo2  | Reg variation           | mus_musculus |       |         |      |           |
| 16 | 74054116 | .                                     | CCA            | C      | Robo2  | Reg variation           | mus_musculus |       |         |      |           |
| 16 | 74054376 | rs240018993                           | CA             | C      | Robo2  | Reg variation           | mus_musculus |       |         |      |           |
| 16 | 74054754 | rs256060020                           | C              | CT     | Robo2  | Reg variation           | mus_musculus |       |         |      |           |
| 16 | 74056318 | rs212314391                           | G              | GTT    | Robo2  | Reg variation           | mus_musculus |       |         |      |           |
| 16 | 74057826 | rs259808339                           | C              | CAGGA  | Robo2  | Reg variation           | mus_musculus |       |         |      |           |
| 16 | 74059067 | rs230405107; rs256100252              | A              | AG     | Robo2  | Reg variation           | mus_musculus |       |         |      |           |
| 16 | 74061670 | rs236966622                           | C              | CT     | Robo2  | Reg variation           | mus_musculus |       |         |      |           |
| 16 | 74062276 | rs233701242                           | GTTTGA         | G      | Robo2  | Reg variation           | mus_musculus |       |         |      |           |
| 16 | 74062770 | rs245251528                           | TA             | T      | Robo2  | Reg variation           | mus_musculus |       |         |      |           |
| 16 | 74063241 | rs258503868                           | AT             | A      | Robo2  | Reg variation           | mus_musculus |       |         |      |           |
| 16 | 74345574 | rs237897295                           | T              | TA     | Robo2  | Reg variation           | mus_musculus |       |         |      |           |
| 16 | 74348068 | rs241702107                           | T              | TA     | Robo2  | Reg variation           | mus_musculus |       |         |      |           |
| 16 | 74348332 | rs220941882; rs248539279              | T              | TGGG   | Robo2  | Reg variation           | mus_musculus |       |         |      |           |

|    |          |             |    |          |       |               |              |  |  |  |  |
|----|----------|-------------|----|----------|-------|---------------|--------------|--|--|--|--|
| 16 | 74349772 | .           | GT | G        | Robo2 | Reg variation | mus_musculus |  |  |  |  |
| 16 | 74412324 | rs219605382 | G  | GA       | Robo2 | Reg variation | mus_musculus |  |  |  |  |
| 16 | 74412836 | rs229193669 | T  | TG       | Robo2 | Reg variation | mus_musculus |  |  |  |  |
| 16 | 74413286 | rs265669198 | C  | CTTTTGTT | Robo2 | Reg variation | mus_musculus |  |  |  |  |
| 16 | 74413750 | rs253333669 | A  | AATC     | Robo2 | Reg variation | mus_musculus |  |  |  |  |
| 16 | 73892876 | rs4203562   | G  | A        | Robo2 | Reg variation | mus_musculus |  |  |  |  |
| 16 | 73896261 | rs4203567   | T  | C        | Robo2 | Reg variation | mus_musculus |  |  |  |  |
| 16 | 73908943 | rs49848352  | C  | A        | Robo2 | Reg variation | mus_musculus |  |  |  |  |
| 16 | 73910165 | rs4203590   | C  | T        | Robo2 | Reg variation | mus_musculus |  |  |  |  |
| 16 | 73975266 | rs4203693   | A  | G        | Robo2 | Reg variation | mus_musculus |  |  |  |  |
| 16 | 73975726 | rs4203694   | T  | C        | Robo2 | Reg variation | mus_musculus |  |  |  |  |
| 16 | 73975867 | rs4203695   | G  | C        | Robo2 | Reg variation | mus_musculus |  |  |  |  |
| 16 | 73977527 | rs4203696   | C  | T        | Robo2 | Reg variation | mus_musculus |  |  |  |  |
| 16 | 73977996 | rs3699192   | G  | A        | Robo2 | Reg variation | mus_musculus |  |  |  |  |
| 16 | 73979311 | rs4203697   | A  | G        | Robo2 | Reg variation | mus_musculus |  |  |  |  |
| 16 | 73979692 | rs4203698   | G  | T        | Robo2 | Reg variation | mus_musculus |  |  |  |  |
| 16 | 73980290 | rs4203700   | G  | C        | Robo2 | Reg variation | mus_musculus |  |  |  |  |
| 16 | 73980668 | rs4203701   | T  | C        | Robo2 | Reg variation | mus_musculus |  |  |  |  |
| 16 | 73980885 | rs3714883   | A  | G        | Robo2 | Reg variation | mus_musculus |  |  |  |  |
| 16 | 73981086 | rs52331345  | T  | G        | Robo2 | Reg variation | mus_musculus |  |  |  |  |
| 16 | 73981222 | rs3717345   | T  | A        | Robo2 | Reg variation | mus_musculus |  |  |  |  |
| 16 | 73981904 | rs4203702   | A  | T        | Robo2 | Reg variation | mus_musculus |  |  |  |  |
| 16 | 74027895 | rs47563265  | T  | G        | Robo2 | Reg variation | mus_musculus |  |  |  |  |
| 16 | 74028392 | rs4203772   | A  | G        | Robo2 | Reg variation | mus_musculus |  |  |  |  |
| 16 | 74028434 | rs4203773   | T  | A        | Robo2 | Reg variation | mus_musculus |  |  |  |  |
| 16 | 74028974 | rs33347616  | C  | G        | Robo2 | Reg variation | mus_musculus |  |  |  |  |
| 16 | 74029221 | rs4203774   | T  | C        | Robo2 | Reg variation | mus_musculus |  |  |  |  |
| 16 | 74029341 | rs4203775   | C  | T        | Robo2 | Reg variation | mus_musculus |  |  |  |  |
| 16 | 74030626 | rs4203776   | C  | T        | Robo2 | Reg variation | mus_musculus |  |  |  |  |
| 16 | 74031053 | rs33346715  | G  | A        | Robo2 | Reg variation | mus_musculus |  |  |  |  |
| 16 | 74039132 | rs33350342  | G  | A        | Robo2 | Reg variation | mus_musculus |  |  |  |  |
| 16 | 74040183 | rs4203791   | A  | C        | Robo2 | Reg variation | mus_musculus |  |  |  |  |
| 16 | 74040191 | rs4203792   | G  | A        | Robo2 | Reg variation | mus_musculus |  |  |  |  |
| 16 | 74041873 | rs3681400   | G  | T        | Robo2 | Reg variation | mus_musculus |  |  |  |  |
| 16 | 74041890 | rs3681447   | A  | G        | Robo2 | Reg variation | mus_musculus |  |  |  |  |
| 16 | 74041960 | rs3682029   | C  | A        | Robo2 | Reg variation | mus_musculus |  |  |  |  |
| 16 | 74042424 | rs52705921  | G  | A        | Robo2 | Reg variation | mus_musculus |  |  |  |  |
| 16 | 74043187 | rs4203793   | A  | G        | Robo2 | Reg variation | mus_musculus |  |  |  |  |
| 16 | 74044007 | rs32678549  | A  | C        | Robo2 | Reg variation | mus_musculus |  |  |  |  |
| 16 | 74054084 | rs4203816   | C  | A        | Robo2 | Reg variation | mus_musculus |  |  |  |  |
| 16 | 74054143 | rs4203817   | C  | T        | Robo2 | Reg variation | mus_musculus |  |  |  |  |
| 16 | 74055478 | rs33352015  | T  | A        | Robo2 | Reg variation | mus_musculus |  |  |  |  |
| 16 | 74055497 | rs51779781  | G  | A        | Robo2 | Reg variation | mus_musculus |  |  |  |  |
| 16 | 74055955 | rs51905317  | T  | C        | Robo2 | Reg variation | mus_musculus |  |  |  |  |
| 16 | 74055985 | rs45700578  | A  | G        | Robo2 | Reg variation | mus_musculus |  |  |  |  |
| 16 | 74056004 | rs33352014  | G  | T        | Robo2 | Reg variation | mus_musculus |  |  |  |  |
| 16 | 74056025 | rs46593749  | G  | A        | Robo2 | Reg variation | mus_musculus |  |  |  |  |
| 16 | 74056035 | rs50620471  | C  | T        | Robo2 | Reg variation | mus_musculus |  |  |  |  |
| 16 | 74056056 | rs52054648  | T  | C        | Robo2 | Reg variation | mus_musculus |  |  |  |  |
| 16 | 74056088 | rs49748686  | A  | T        | Robo2 | Reg variation | mus_musculus |  |  |  |  |
| 16 | 74056089 | rs48719282  | A  | C        | Robo2 | Reg variation | mus_musculus |  |  |  |  |
| 16 | 74056143 | rs33351093  | G  | A        | Robo2 | Reg variation | mus_musculus |  |  |  |  |
| 16 | 74056607 | rs52706009  | C  | T        | Robo2 | Reg variation | mus_musculus |  |  |  |  |
| 16 | 74056624 | rs230276400 | G  | A        | Robo2 | Reg variation | mus_musculus |  |  |  |  |

|    |          |             |   |   |       |               |              |  |  |  |  |
|----|----------|-------------|---|---|-------|---------------|--------------|--|--|--|--|
| 16 | 74056745 | rs249196572 | G | A | Robo2 | Reg variation | mus_musculus |  |  |  |  |
| 16 | 74056867 | rs48348711  | A | G | Robo2 | Reg variation | mus_musculus |  |  |  |  |
| 16 | 74057237 | rs4203818   | T | C | Robo2 | Reg variation | mus_musculus |  |  |  |  |
| 16 | 74057425 | rs4203819   | C | T | Robo2 | Reg variation | mus_musculus |  |  |  |  |
| 16 | 74057526 | rs4203820   | T | C | Robo2 | Reg variation | mus_musculus |  |  |  |  |
| 16 | 74057527 | rs4203821   | G | A | Robo2 | Reg variation | mus_musculus |  |  |  |  |
| 16 | 74057693 | rs33351086  | C | T | Robo2 | Reg variation | mus_musculus |  |  |  |  |
| 16 | 74057732 | rs33351085  | G | C | Robo2 | Reg variation | mus_musculus |  |  |  |  |
| 16 | 74057740 | rs33351084  | A | T | Robo2 | Reg variation | mus_musculus |  |  |  |  |
| 16 | 74057794 | rs46187444  | T | C | Robo2 | Reg variation | mus_musculus |  |  |  |  |
| 16 | 74058012 | rs48036286  | A | G | Robo2 | Reg variation | mus_musculus |  |  |  |  |
| 16 | 74058014 | rs52018698  | C | T | Robo2 | Reg variation | mus_musculus |  |  |  |  |
| 16 | 74058172 | rs33350229  | C | T | Robo2 | Reg variation | mus_musculus |  |  |  |  |
| 16 | 74058223 | rs49591595  | A | G | Robo2 | Reg variation | mus_musculus |  |  |  |  |
| 16 | 74058586 | rs4203822   | T | C | Robo2 | Reg variation | mus_musculus |  |  |  |  |
| 16 | 74058754 | rs4203823   | G | A | Robo2 | Reg variation | mus_musculus |  |  |  |  |
| 16 | 74058768 | rs4203824   | G | A | Robo2 | Reg variation | mus_musculus |  |  |  |  |
| 16 | 74059455 | rs4203825   | G | A | Robo2 | Reg variation | mus_musculus |  |  |  |  |
| 16 | 74059483 | rs4203826   | C | T | Robo2 | Reg variation | mus_musculus |  |  |  |  |
| 16 | 74059497 | rs4203827   | A | G | Robo2 | Reg variation | mus_musculus |  |  |  |  |
| 16 | 74059940 | rs4203828   | C | A | Robo2 | Reg variation | mus_musculus |  |  |  |  |
| 16 | 74060572 | rs4203829   | T | C | Robo2 | Reg variation | mus_musculus |  |  |  |  |
| 16 | 74060589 | rs4203830   | A | G | Robo2 | Reg variation | mus_musculus |  |  |  |  |
| 16 | 74060659 | rs218276349 | T | C | Robo2 | Reg variation | mus_musculus |  |  |  |  |
| 16 | 74061033 | .           | T | G | Robo2 | Reg variation | mus_musculus |  |  |  |  |
| 16 | 74061336 | rs50524423  | T | C | Robo2 | Reg variation | mus_musculus |  |  |  |  |
| 16 | 74061764 | rs48914760  | G | A | Robo2 | Reg variation | mus_musculus |  |  |  |  |
| 16 | 74062035 | rs50446798  | G | A | Robo2 | Reg variation | mus_musculus |  |  |  |  |
| 16 | 74062650 | rs3692196   | A | C | Robo2 | Reg variation | mus_musculus |  |  |  |  |
| 16 | 74062901 | rs4203831   | A | T | Robo2 | Reg variation | mus_musculus |  |  |  |  |
| 16 | 74063489 | rs4203832   | G | T | Robo2 | Reg variation | mus_musculus |  |  |  |  |
| 16 | 74063996 | rs52480278  | C | T | Robo2 | Reg variation | mus_musculus |  |  |  |  |
| 16 | 74344818 | rs33337424  | A | G | Robo2 | Reg variation | mus_musculus |  |  |  |  |
| 16 | 74344895 | rs33340142  | C | T | Robo2 | Reg variation | mus_musculus |  |  |  |  |
| 16 | 74344972 | rs33340141  | C | A | Robo2 | Reg variation | mus_musculus |  |  |  |  |
| 16 | 74345021 | rs33340140  | T | G | Robo2 | Reg variation | mus_musculus |  |  |  |  |
| 16 | 74345097 | rs49403085  | C | T | Robo2 | Reg variation | mus_musculus |  |  |  |  |
| 16 | 74345147 | rs33340138  | T | A | Robo2 | Reg variation | mus_musculus |  |  |  |  |
| 16 | 74345171 | rs33340137  | T | G | Robo2 | Reg variation | mus_musculus |  |  |  |  |
| 16 | 74345286 | rs48509390  | A | C | Robo2 | Reg variation | mus_musculus |  |  |  |  |
| 16 | 74345733 | rs33340136  | C | A | Robo2 | Reg variation | mus_musculus |  |  |  |  |
| 16 | 74346113 | rs4204285   | T | C | Robo2 | Reg variation | mus_musculus |  |  |  |  |
| 16 | 74346271 | rs4204286   | G | A | Robo2 | Reg variation | mus_musculus |  |  |  |  |
| 16 | 74346290 | rs4204287   | T | C | Robo2 | Reg variation | mus_musculus |  |  |  |  |
| 16 | 74346871 | rs4204288   | T | C | Robo2 | Reg variation | mus_musculus |  |  |  |  |
| 16 | 74346944 | rs4204289   | C | T | Robo2 | Reg variation | mus_musculus |  |  |  |  |
| 16 | 74346953 | rs4204290   | T | C | Robo2 | Reg variation | mus_musculus |  |  |  |  |
| 16 | 74346962 | rs4204291   | T | A | Robo2 | Reg variation | mus_musculus |  |  |  |  |
| 16 | 74347284 | rs4204292   | G | A | Robo2 | Reg variation | mus_musculus |  |  |  |  |
| 16 | 74347514 | rs4204293   | T | C | Robo2 | Reg variation | mus_musculus |  |  |  |  |
| 16 | 74347640 | rs4204294   | A | T | Robo2 | Reg variation | mus_musculus |  |  |  |  |
| 16 | 74347641 | rs4204295   | A | T | Robo2 | Reg variation | mus_musculus |  |  |  |  |
| 16 | 74347745 | rs4204296   | C | T | Robo2 | Reg variation | mus_musculus |  |  |  |  |
| 16 | 74347868 | rs33340134  | A | C | Robo2 | Reg variation | mus_musculus |  |  |  |  |

|    |          |                          |                   |           |          |                         |              |  |  |  |  |
|----|----------|--------------------------|-------------------|-----------|----------|-------------------------|--------------|--|--|--|--|
| 16 | 74348041 | rs4204297                | T                 | A         | Robo2    | Reg variation           | mus_musculus |  |  |  |  |
| 16 | 74348179 | rs4204298                | C                 | T         | Robo2    | Reg variation           | mus_musculus |  |  |  |  |
| 16 | 74348218 | rs387725519              | T                 | C         | Robo2    | Reg variation           | mus_musculus |  |  |  |  |
| 16 | 74348240 | rs4204299                | A                 | C         | Robo2    | Reg variation           | mus_musculus |  |  |  |  |
| 16 | 74348271 | rs4204300                | A                 | G         | Robo2    | Reg variation           | mus_musculus |  |  |  |  |
| 16 | 74349288 | rs33339142               | C                 | T         | Robo2    | Reg variation           | mus_musculus |  |  |  |  |
| 16 | 74411380 | rs4204414                | T                 | C         | Robo2    | Reg variation           | mus_musculus |  |  |  |  |
| 16 | 74411549 | rs4204415                | A                 | C         | Robo2    | Reg variation           | mus_musculus |  |  |  |  |
| 16 | 74411713 | rs4204416                | A                 | G         | Robo2    | Reg variation           | mus_musculus |  |  |  |  |
| 16 | 74411816 | rs49551852               | C                 | T         | Robo2    | Reg variation           | mus_musculus |  |  |  |  |
| 16 | 74411864 | rs52407648               | T                 | C         | Robo2    | Reg variation           | mus_musculus |  |  |  |  |
| 16 | 74411999 | rs46051170               | C                 | T         | Robo2    | Reg variation           | mus_musculus |  |  |  |  |
| 16 | 74412877 | rs4136625                | T                 | A         | Robo2    | Reg variation           | mus_musculus |  |  |  |  |
| 16 | 74413573 | rs4204420                | C                 | A         | Robo2    | Reg variation           | mus_musculus |  |  |  |  |
| 16 | 74413780 | rs4204421                | T                 | C         | Robo2    | Reg variation           | mus_musculus |  |  |  |  |
| 16 | 73892876 | rs4203562                | G                 | A         | Robo2    | UTR variation           | mus_musculus |  |  |  |  |
| 16 | 73920483 | rs4203614                | A                 | C         | Robo2    | UTR variation           | mus_musculus |  |  |  |  |
| 16 | 74411380 | rs4204414                | T                 | C         | Robo2    | UTR variation           | mus_musculus |  |  |  |  |
| 16 | 74411549 | rs4204415                | A                 | C         | Robo2    | UTR variation           | mus_musculus |  |  |  |  |
| 16 | 74411713 | rs4204416                | A                 | G         | Robo2    | UTR variation           | mus_musculus |  |  |  |  |
| 16 | 43574026 | .                        | C                 | CAG       | Zbtb20   | Reg variation           | mus_musculus |  |  |  |  |
| 16 | 43363706 | .                        | G                 | T         | Zbtb20   | Reg variation           | mus_musculus |  |  |  |  |
| 16 | 43510153 | .                        | A                 | G         | Zbtb20   | Reg variation           | mus_musculus |  |  |  |  |
| 16 | 75213347 | rs7202877                | T                 | C, G      | CTRB1    |                         | homo sapiens |  |  |  |  |
| 16 | 75212137 | rs72802365               | G                 | C         | CTRB1    |                         | homo sapiens |  |  |  |  |
| 16 | 75209874 | rs77258096               | C                 | A, G      | CTRB1    | upstream_gene_variant   | homo sapiens |  |  |  |  |
| 16 | 75212137 | rs72802365               | G                 | C         | CTRB1    | upstream_gene_variant   | homo sapiens |  |  |  |  |
| 16 | 75212137 | rs72802365               | G                 | C         | CTRB2    |                         | homo sapiens |  |  |  |  |
| 16 | 75200974 | rs72802342               | C                 | A         | CTRB2    | downstream_gene_variant | homo sapiens |  |  |  |  |
| 16 | 75212137 | rs72802365               | G                 | C         | CTRB2    | upstream_gene_variant   | homo sapiens |  |  |  |  |
| 16 | 75213347 | rs7202877                | T                 | C, G      | CTRB2    |                         | homo sapiens |  |  |  |  |
| 16 | 69617963 | rs862320                 | C                 | T         | NFAT5    | intron_variant          | homo sapiens |  |  |  |  |
| 16 | 69624093 | rs244420                 | T                 | G         | NFAT5    | NMD_transcript_variant  | homo sapiens |  |  |  |  |
| 16 | 69632780 | rs244415                 | G                 | A         | NFAT5    | intron_variant          | homo sapiens |  |  |  |  |
| 16 | 69632780 | rs244415                 | G                 | A         | NFAT5    | NMD_transcript_variant  | homo sapiens |  |  |  |  |
| 16 | 69617963 | rs862320                 | C                 | T         | NFAT5    | NMD_transcript_variant  | homo sapiens |  |  |  |  |
| 16 | 69624093 | rs244420                 | T                 | G         | NFAT5    | intron_variant          | homo sapiens |  |  |  |  |
| 16 | 69534400 | rs2032912                | G                 | A, T      | NFAT5    |                         | homo sapiens |  |  |  |  |
| 16 | 89564222 | rs12932337               | C                 | T         | RPL13    | downstream_gene_variant | homo sapiens |  |  |  |  |
| 16 | 89564222 | rs12932337               | C                 | T         | RPL13    | 3_prime_UTR_variant     | homo sapiens |  |  |  |  |
| 17 | 29267293 | rs226585485              | CTTTT             | CT, C     | BC004004 | Reg variation           | mus_musculus |  |  |  |  |
| 17 | 29267956 | rs261000219              | GT                | G         | BC004004 | Reg variation           | mus_musculus |  |  |  |  |
| 17 | 29287499 | rs256662147              | A                 | AT        | BC004004 | Reg variation           | mus_musculus |  |  |  |  |
| 17 | 29287866 | rs216378102              | ATGTGTGTGTG       | A         | BC004004 | Reg variation           | mus_musculus |  |  |  |  |
| 17 | 29304502 | rs256652575              | A                 | ATTCTCAC  | BC004004 | Reg variation           | mus_musculus |  |  |  |  |
| 17 | 29304756 | rs232708373; rs218077152 | CT                | C         | BC004004 | Reg variation           | mus_musculus |  |  |  |  |
| 17 | 29305075 | rs229739750              | G                 | GC        | BC004004 | Reg variation           | mus_musculus |  |  |  |  |
| 17 | 29307290 | rs230972476              | GAGGTTGCGCCTGGTTC | G         | BC004004 | Reg variation           | mus_musculus |  |  |  |  |
| 17 | 29307648 | rs242570654              | C                 | CTTCTCCCT | BC004004 | Reg variation           | mus_musculus |  |  |  |  |
| 17 | 29307911 | rs256947670              | ACC               | A         | BC004004 | Reg variation           | mus_musculus |  |  |  |  |
| 17 | 29308652 | rs239560996              | GAAA              | G         | BC004004 | Reg variation           | mus_musculus |  |  |  |  |
| 17 | 29309758 | rs229151187              | C                 | CTGTTTT   | BC004004 | Reg variation           | mus_musculus |  |  |  |  |
| 17 | 29310331 | rs221738271              | A                 | AT        | BC004004 | Reg variation           | mus_musculus |  |  |  |  |
| 17 | 29311068 | rs229882545              | TGCTAGCTAGGA      | T         | BC004004 | Reg variation           | mus_musculus |  |  |  |  |

|    |          |             |                 |           |          |               |              |  |  |  |  |
|----|----------|-------------|-----------------|-----------|----------|---------------|--------------|--|--|--|--|
| 17 | 29311273 | rs261442058 | GC              | G         | BC004004 | Reg variation | mus_musculus |  |  |  |  |
| 17 | 29311405 | rs262718797 | CA              | C         | BC004004 | Reg variation | mus_musculus |  |  |  |  |
| 17 | 29311592 | rs245534624 | GC              | G         | BC004004 | Reg variation | mus_musculus |  |  |  |  |
| 17 | 29311834 | rs223814036 | AAGGTTCCACTCAGC | A         | BC004004 | Reg variation | mus_musculus |  |  |  |  |
| 17 | 29312007 | .           | G               | GAGGCAGGC | BC004004 | Reg variation | mus_musculus |  |  |  |  |
| 17 | 29312088 | rs259459162 | GA              | G         | BC004004 | Reg variation | mus_musculus |  |  |  |  |
| 17 | 29312173 | rs241295943 | G               | GCA       | BC004004 | Reg variation | mus_musculus |  |  |  |  |
| 17 | 29312571 | rs236370919 | T               | TTA       | BC004004 | Reg variation | mus_musculus |  |  |  |  |
| 17 | 29269165 | rs248228371 | C               | T         | BC004004 | Reg variation | mus_musculus |  |  |  |  |
| 17 | 29271889 | rs213256747 | C               | T         | BC004004 | Reg variation | mus_musculus |  |  |  |  |
| 17 | 29272343 | rs257329784 | T               | C         | BC004004 | Reg variation | mus_musculus |  |  |  |  |
| 17 | 29273733 | rs582011673 | T               | A         | BC004004 | Reg variation | mus_musculus |  |  |  |  |
| 17 | 29304543 | rs51290938  | A               | G         | BC004004 | Reg variation | mus_musculus |  |  |  |  |
| 17 | 29305007 | rs33133909  | T               | C         | BC004004 | Reg variation | mus_musculus |  |  |  |  |
| 17 | 29305843 | rs33612305  | A               | G         | BC004004 | Reg variation | mus_musculus |  |  |  |  |
| 17 | 29307350 | rs108602876 | T               | C         | BC004004 | Reg variation | mus_musculus |  |  |  |  |
| 17 | 29307452 | rs48023282  | C               | T         | BC004004 | Reg variation | mus_musculus |  |  |  |  |
| 17 | 29307618 | rs52496395  | C               | T         | BC004004 | Reg variation | mus_musculus |  |  |  |  |
| 17 | 29307836 | rs48285977  | T               | C         | BC004004 | Reg variation | mus_musculus |  |  |  |  |
| 17 | 29308001 | rs30919676  | G               | A         | BC004004 | Reg variation | mus_musculus |  |  |  |  |
| 17 | 29308132 | rs48938285  | A               | G         | BC004004 | Reg variation | mus_musculus |  |  |  |  |
| 17 | 29308697 | rs30857532  | T               | C         | BC004004 | Reg variation | mus_musculus |  |  |  |  |
| 17 | 29308975 | rs260910626 | G               | A         | BC004004 | Reg variation | mus_musculus |  |  |  |  |
| 17 | 29309465 | rs108042555 | T               | C         | BC004004 | Reg variation | mus_musculus |  |  |  |  |
| 17 | 29309487 | rs108179082 | T               | C         | BC004004 | Reg variation | mus_musculus |  |  |  |  |
| 17 | 29309490 | rs244580538 | G               | A         | BC004004 | Reg variation | mus_musculus |  |  |  |  |
| 17 | 29309493 | rs107793026 | A               | T         | BC004004 | Reg variation | mus_musculus |  |  |  |  |
| 17 | 29309524 | rs108923471 | T               | C         | BC004004 | Reg variation | mus_musculus |  |  |  |  |
| 17 | 29309529 | rs247128622 | C               | T         | BC004004 | Reg variation | mus_musculus |  |  |  |  |
| 17 | 29309554 | rs215028525 | G               | C         | BC004004 | Reg variation | mus_musculus |  |  |  |  |
| 17 | 29309556 | rs236379620 | C               | T         | BC004004 | Reg variation | mus_musculus |  |  |  |  |
| 17 | 29309603 | rs108260318 | A               | T         | BC004004 | Reg variation | mus_musculus |  |  |  |  |
| 17 | 29309608 | rs107730200 | A               | G         | BC004004 | Reg variation | mus_musculus |  |  |  |  |
| 17 | 29309644 | rs51203072  | G               | A         | BC004004 | Reg variation | mus_musculus |  |  |  |  |
| 17 | 29309708 | rs50099778  | A               | G         | BC004004 | Reg variation | mus_musculus |  |  |  |  |
| 17 | 29310035 | rs108926831 | T               | C         | BC004004 | Reg variation | mus_musculus |  |  |  |  |
| 17 | 29310037 | rs108118473 | C               | T         | BC004004 | Reg variation | mus_musculus |  |  |  |  |
| 17 | 29310051 | rs108253591 | T               | C         | BC004004 | Reg variation | mus_musculus |  |  |  |  |
| 17 | 29310183 | rs108189697 | A               | G         | BC004004 | Reg variation | mus_musculus |  |  |  |  |
| 17 | 29310217 | rs230380999 | C               | T         | BC004004 | Reg variation | mus_musculus |  |  |  |  |
| 17 | 29310229 | rs241179719 | C               | T         | BC004004 | Reg variation | mus_musculus |  |  |  |  |
| 17 | 29310399 | rs30629643  | A               | G         | BC004004 | Reg variation | mus_musculus |  |  |  |  |
| 17 | 29310449 | rs107836634 | C               | A         | BC004004 | Reg variation | mus_musculus |  |  |  |  |
| 17 | 29310553 | rs30670865  | T               | C         | BC004004 | Reg variation | mus_musculus |  |  |  |  |
| 17 | 29310625 | rs107837293 | G               | A         | BC004004 | Reg variation | mus_musculus |  |  |  |  |
| 17 | 29310656 | rs49228927  | A               | G         | BC004004 | Reg variation | mus_musculus |  |  |  |  |
| 17 | 29310687 | rs251528215 | T               | C         | BC004004 | Reg variation | mus_musculus |  |  |  |  |
| 17 | 29310859 | rs230459471 | G               | A         | BC004004 | Reg variation | mus_musculus |  |  |  |  |
| 17 | 29310869 | .           | A               | G         | BC004004 | Reg variation | mus_musculus |  |  |  |  |
| 17 | 29310954 | rs258974213 | G               | A         | BC004004 | Reg variation | mus_musculus |  |  |  |  |
| 17 | 29311047 | rs108554823 | A               | G         | BC004004 | Reg variation | mus_musculus |  |  |  |  |
| 17 | 29311053 | rs108250813 | A               | G         | BC004004 | Reg variation | mus_musculus |  |  |  |  |
| 17 | 29311083 | rs108936458 | G               | A         | BC004004 | Reg variation | mus_musculus |  |  |  |  |
| 17 | 29311110 | rs108185544 | C               | T         | BC004004 | Reg variation | mus_musculus |  |  |  |  |

|    |          |                          |           |      |          |               |              |  |  |  |  |
|----|----------|--------------------------|-----------|------|----------|---------------|--------------|--|--|--|--|
| 17 | 29311159 | rs230996811              | G         | A    | BC004004 | Reg variation | mus_musculus |  |  |  |  |
| 17 | 29311238 | rs108001035              | G         | A    | BC004004 | Reg variation | mus_musculus |  |  |  |  |
| 17 | 29311285 | rs108061214              | G         | C    | BC004004 | Reg variation | mus_musculus |  |  |  |  |
| 17 | 29311467 | rs213792041              | G         | A    | BC004004 | Reg variation | mus_musculus |  |  |  |  |
| 17 | 29311470 | rs213790144              | C         | T    | BC004004 | Reg variation | mus_musculus |  |  |  |  |
| 17 | 29311473 | rs233380839              | C         | T    | BC004004 | Reg variation | mus_musculus |  |  |  |  |
| 17 | 29311530 | rs250987833              | A         | C    | BC004004 | Reg variation | mus_musculus |  |  |  |  |
| 17 | 29311544 | rs223028412              | C         | T    | BC004004 | Reg variation | mus_musculus |  |  |  |  |
| 17 | 29311548 | rs234643935              | C         | T    | BC004004 | Reg variation | mus_musculus |  |  |  |  |
| 17 | 29311679 | rs108209357              | C         | T    | BC004004 | Reg variation | mus_musculus |  |  |  |  |
| 17 | 29311769 | rs107750987              | C         | T    | BC004004 | Reg variation | mus_musculus |  |  |  |  |
| 17 | 29311777 | rs108478221              | T         | C    | BC004004 | Reg variation | mus_musculus |  |  |  |  |
| 17 | 29311888 | rs258121483              | C         | T    | BC004004 | Reg variation | mus_musculus |  |  |  |  |
| 17 | 29312027 | rs108395767              | A         | G    | BC004004 | Reg variation | mus_musculus |  |  |  |  |
| 17 | 29312062 | rs52325053               | G         | A    | BC004004 | Reg variation | mus_musculus |  |  |  |  |
| 17 | 29312136 | rs30919641               | A         | G    | BC004004 | Reg variation | mus_musculus |  |  |  |  |
| 17 | 29312244 | rs108876746              | C         | T    | BC004004 | Reg variation | mus_musculus |  |  |  |  |
| 17 | 29312258 | rs108327962              | A         | G    | BC004004 | Reg variation | mus_musculus |  |  |  |  |
| 17 | 29312290 | rs108695319              | T         | A    | BC004004 | Reg variation | mus_musculus |  |  |  |  |
| 17 | 29312299 | rs256194365              | C         | T    | BC004004 | Reg variation | mus_musculus |  |  |  |  |
| 17 | 29312329 | rs107760690              | A         | G    | BC004004 | Reg variation | mus_musculus |  |  |  |  |
| 17 | 29312395 | .                        | T         | C    | BC004004 | Reg variation | mus_musculus |  |  |  |  |
| 17 | 29312398 | rs227974995              | T         | C    | BC004004 | Reg variation | mus_musculus |  |  |  |  |
| 17 | 29312405 | .                        | C         | T    | BC004004 | Reg variation | mus_musculus |  |  |  |  |
| 17 | 29312409 | rs216124789              | A         | C    | BC004004 | Reg variation | mus_musculus |  |  |  |  |
| 17 | 29312502 | rs108479121              | T         | C    | BC004004 | Reg variation | mus_musculus |  |  |  |  |
| 17 | 29312543 | rs108390126              | G         | A    | BC004004 | Reg variation | mus_musculus |  |  |  |  |
| 17 | 29312599 | rs245107250              | G         | A    | BC004004 | Reg variation | mus_musculus |  |  |  |  |
| 17 | 29312643 | rs47100161               | G         | C    | BC004004 | Reg variation | mus_musculus |  |  |  |  |
| 17 | 29312737 | rs30914093               | T         | C    | BC004004 | Reg variation | mus_musculus |  |  |  |  |
| 17 | 29312827 | rs108017790              | C         | T    | BC004004 | Reg variation | mus_musculus |  |  |  |  |
| 17 | 29312839 | rs237415664              | G         | A    | BC004004 | Reg variation | mus_musculus |  |  |  |  |
| 17 | 29312859 | rs247092191              | C         | T    | BC004004 | Reg variation | mus_musculus |  |  |  |  |
| 17 | 29312899 | rs47575500               | A         | C    | BC004004 | Reg variation | mus_musculus |  |  |  |  |
| 17 | 29313227 | rs108622984              | T         | A    | BC004004 | Reg variation | mus_musculus |  |  |  |  |
| 17 | 29313313 | rs30928919               | A         | G    | BC004004 | Reg variation | mus_musculus |  |  |  |  |
| 17 | 29313357 | rs30580646               | T         | A    | BC004004 | Reg variation | mus_musculus |  |  |  |  |
| 17 | 29313384 | rs50087055               | G         | A    | BC004004 | Reg variation | mus_musculus |  |  |  |  |
| 17 | 29313414 | rs30862994               | G         | A    | BC004004 | Reg variation | mus_musculus |  |  |  |  |
| 17 | 29313509 | rs232735304              | G         | A    | BC004004 | Reg variation | mus_musculus |  |  |  |  |
| 17 | 30901606 | rs232123326              | GAGCTAGAA | G    | Glp1r    | Reg variation | mus_musculus |  |  |  |  |
| 17 | 30936737 | rs246402989              | GT        | G    | Glp1r    | Reg variation | mus_musculus |  |  |  |  |
| 17 | 30940358 | rs242732366; rs221419620 | C         | CTTT | Glp1r    | Reg variation | mus_musculus |  |  |  |  |
| 17 | 30901149 | rs46185186               | G         | A    | Glp1r    | Reg variation | mus_musculus |  |  |  |  |
| 17 | 30901326 | rs50032916               | A         | C    | Glp1r    | Reg variation | mus_musculus |  |  |  |  |
| 17 | 30901327 | rs262811621              | G         | A    | Glp1r    | Reg variation | mus_musculus |  |  |  |  |
| 17 | 30901589 | rs48583124               | G         | C    | Glp1r    | Reg variation | mus_musculus |  |  |  |  |
| 17 | 30901690 | rs107751216              | G         | A    | Glp1r    | Reg variation | mus_musculus |  |  |  |  |
| 17 | 30901757 | rs249804735              | C         | T    | Glp1r    | Reg variation | mus_musculus |  |  |  |  |
| 17 | 30939912 | rs49960929               | A         | G    | Glp1r    | Reg variation | mus_musculus |  |  |  |  |
| 17 | 30940215 | rs48806188               | A         | G    | Glp1r    | Reg variation | mus_musculus |  |  |  |  |
| 17 | 30940585 | rs224349489              | C         | T    | Glp1r    | Reg variation | mus_musculus |  |  |  |  |
| 17 | 30901873 | rs107804085              | A         | C    | Glp1r    | UTR variation | mus_musculus |  |  |  |  |
| 17 | 46017028 | rs221047555; rs248218400 | CT        | C    | Vegfa    | Reg variation | mus_musculus |  |  |  |  |



|    |          |                          |             |       |                 |                                    |              |       |         |       |          |
|----|----------|--------------------------|-------------|-------|-----------------|------------------------------------|--------------|-------|---------|-------|----------|
| 17 | 46017318 | rs244186943              | CAT         | C     | <i>Vegfa</i>    | Reg variation                      | mus_musculus |       |         |       |          |
| 17 | 46017527 | rs235971214              | T           | TACAC | <i>Vegfa</i>    | Reg variation                      | mus_musculus |       |         |       |          |
| 17 | 46026979 | rs265694992              | C           | CAA   | <i>Vegfa</i>    | Reg variation                      | mus_musculus |       |         |       |          |
| 17 | 46033382 | rs244149178; rs224419448 | TCACA       | T     | <i>Vegfa</i>    | Reg variation                      | mus_musculus |       |         |       |          |
| 17 | 46018702 | rs46353271               | G           | A     | <i>Vegfa</i>    | Reg variation                      | mus_musculus |       |         |       |          |
| 17 | 46021601 | rs16783787               | T           | C     | <i>Vegfa</i>    | Reg variation                      | mus_musculus |       |         |       |          |
| 17 | 46023541 | rs16783796               | G           | A     | <i>Vegfa</i>    | Reg variation                      | mus_musculus |       |         |       |          |
| 17 | 46023673 | rs256073243              | C           | A     | <i>Vegfa</i>    | Reg variation                      | mus_musculus |       |         |       |          |
| 17 | 46025527 | rs16796521               | A           | G     | <i>Vegfa</i>    | Reg variation                      | mus_musculus |       |         |       |          |
| 17 | 46026223 | rs16783807               | T           | C     | <i>Vegfa</i>    | Reg variation                      | mus_musculus |       |         |       |          |
| 17 | 46032926 | rs16821430               | T           | G     | <i>Vegfa</i>    | Reg variation                      | mus_musculus |       |         |       |          |
| 17 | 46017028 | rs221047555; rs248218400 | CT          | C     | <i>Vegfa</i>    | UTR variation                      | mus_musculus |       |         |       |          |
| 17 | 46017318 | rs244186943              | CAT         | C     | <i>Vegfa</i>    | UTR variation                      | mus_musculus |       |         |       |          |
| 17 | 46017527 | rs235971214              | T           | TACAC | <i>Vegfa</i>    | UTR variation                      | mus_musculus |       |         |       |          |
| 17 | 46018702 | rs46353271               | G           | A     | <i>Vegfa</i>    | UTR variation                      | mus_musculus |       |         |       |          |
| 17 | 48862296 | rs10278                  | C           | A, G  | <i>CALCOCO2</i> | downstream_gene_variant            | homo sapiens |       |         |       |          |
| 17 | 48862296 | rs10278                  | C           | A, G  | <i>CALCOCO2</i> | missense_variant                   | homo sapiens | --    | --      | --    | --       |
| 17 | 48917608 | rs12453394               | G           | A     | <i>CALCOCO2</i> | downstream_gene_variant            | homo sapiens |       |         |       |          |
| 17 | 48917608 | rs12453394               | G           | A     | <i>CALCOCO2</i> | intron_variant                     | homo sapiens |       |         |       |          |
| 17 | 48917608 | rs12453394               | G           | A     | <i>CALCOCO2</i> | NMD_transcript_variant             | homo sapiens |       |         |       |          |
| 17 | 48862296 | rs10278                  | C           | A, G  | <i>CALCOCO2</i> | upstream_gene_variant              | homo sapiens |       |         |       |          |
| 17 | 48862296 | rs10278                  | C           | A, G  | <i>CALCOCO2</i> | NMD_transcript_variant             | homo sapiens |       |         |       |          |
| 17 | 48862296 | rs10278                  | C           | A, G  | <i>CALCOCO2</i> | 3_prime_UTR_variant                | homo sapiens |       |         |       |          |
| 17 | 48862296 | rs10278                  | C           | A, G  | <i>CALCOCO2</i> | synonymous_variant                 | homo sapiens |       |         |       |          |
| 17 | 48917608 | rs12453394               | G           | A     | <i>CALCOCO2</i> | non_coding_transcript_variant      | homo sapiens |       |         |       |          |
| 17 | 48917608 | rs12453394               | G           | A     | <i>CALCOCO2</i> | upstream_gene_variant              | homo sapiens |       |         |       |          |
| 17 | 4049808  | rs781852                 | A           | G     | <i>ZZEF1</i>    | 3_prime_UTR_variant                | homo sapiens |       |         |       |          |
| 17 | 4142146  | rs1377807                | G           | C     | <i>ZZEF1</i>    | non_coding_transcript_variant      | homo sapiens |       |         |       |          |
| 17 | 4049808  | rs781852                 | A           | G     | <i>ZZEF1</i>    | NMD_transcript_variant             | homo sapiens |       |         |       |          |
| 17 | 3924792  | rs1043246                | C           | G, T  | <i>ZZEF1</i>    | downstream_gene_variant            | homo sapiens |       |         |       |          |
| 17 | 4111090  | rs7224685                | G           | T     | <i>ZZEF1</i>    | intron_variant                     | homo sapiens |       |         |       |          |
| 17 | 4111090  | rs7224685                | G           | T     | <i>ZZEF1</i>    | non_coding_transcript_variant      | homo sapiens |       |         |       |          |
| 17 | 4044350  | rs781831                 | T           | C     | <i>ZZEF1</i>    | missense_variant                   | homo sapiens | --    | --      | --    | --       |
| 17 | 4142146  | rs1377807                | G           | C     | <i>ZZEF1</i>    | intron_variant                     | homo sapiens |       |         |       |          |
| 17 | 3957062  | rs3826482                | A           | T     | <i>ZZEF1</i>    | intron_variant                     | homo sapiens |       |         |       |          |
| 17 | 4142146  | rs1377807                | G           | C     | <i>ZZEF1</i>    | upstream_gene_variant              | homo sapiens |       |         |       |          |
| 17 | 4049808  | rs781852                 | A           | G     | <i>ZZEF1</i>    | 3_prime_UTR_variant                | homo sapiens |       |         |       |          |
| 17 | 4082570  | rs8068804                | G           | A     | <i>ZZEF1</i>    | non_coding_transcript_variant      | homo sapiens |       |         |       |          |
| 17 | 4085157  | rs8071043                | T           | C     | <i>ZZEF1</i>    | intron_variant                     | homo sapiens |       |         |       |          |
| 17 | 4085157  | rs8071043                | T           | C     | <i>ZZEF1</i>    | non_coding_transcript_variant      | homo sapiens |       |         |       |          |
| 17 | 4082570  | rs8068804                | G           | A     | <i>ZZEF1</i>    | intron_variant                     | homo sapiens |       |         |       |          |
| 17 | 48917608 | rs12453394               | G           | A     | <i>ZZEF1</i>    | missense_variant                   | homo sapiens | --    | --      | --    | --       |
| 17 | 4121530  | rs113547729              | G           | A     | <i>ZZEF1</i>    | intron_variant                     | homo sapiens |       |         |       |          |
| 17 | 4121530  | rs113547729              | G           | A     | <i>ZZEF1</i>    | non_coding_transcript_variant      | homo sapiens |       |         |       |          |
| 17 | 4049808  | rs781852                 | A           | G     | <i>ZZEF1</i>    | non_coding_transcript_exon_variant | homo sapiens |       |         |       |          |
| 17 | 3957062  | rs3826482                | A           | T     | <i>ZZEF1</i>    | non_coding_transcript_variant      | homo sapiens |       |         |       |          |
| 17 | 4044350  | rs781831                 | T           | C     | <i>ZZEF1</i>    | NMD_transcript_variant             | homo sapiens |       |         |       |          |
| 17 | 4044350  | rs781831                 | T           | C     | <i>ZZEF1</i>    | non_coding_transcript_exon_variant | homo sapiens |       |         |       |          |
| 17 | 4102227  | rs747360                 | G           | A, T  | <i>ZZEF1</i>    | intron_variant                     | homo sapiens |       |         |       |          |
| 17 | 4102227  | rs747360                 | G           | A, T  | <i>ZZEF1</i>    | non_coding_transcript_variant      | homo sapiens |       |         |       |          |
| 17 | 3924792  | rs1043246                | C           | G, T  | <i>ZZEF1</i>    | 3_prime_UTR_variant                | homo sapiens |       |         |       |          |
| 18 | 53744327 | rs3662544                | C           | T     | <i>Cep120</i>   | missense_variant                   | mus_musculus | -0.36 | Neutral | 0.042 | Damaging |
| 18 | 53746052 | rs255479009              | T           | TAAAA | <i>Cep120</i>   | Reg variation                      | mus_musculus |       |         |       |          |
| 18 | 53746203 | rs216928235              | CAAAAAAAAAA | C     | <i>Cep120</i>   | Reg variation                      | mus_musculus |       |         |       |          |

|    |          |                          |                       |                |        |                  |              |       |         |       |          |
|----|----------|--------------------------|-----------------------|----------------|--------|------------------|--------------|-------|---------|-------|----------|
| 18 | 53746539 | rs228904475              | CTGTGTGTG             | CTG, C         | Cep120 | Reg variation    | mus_musculus |       |         |       |          |
| 18 | 53744552 | rs3663779                | C                     | T              | Cep120 | Reg variation    | mus_musculus |       |         |       |          |
| 18 | 53744966 | rs48643661               | T                     | G              | Cep120 | Reg variation    | mus_musculus |       |         |       |          |
| 18 | 53744994 | rs48541462               | T                     | G              | Cep120 | Reg variation    | mus_musculus |       |         |       |          |
| 18 | 53745460 | rs29924246               | A                     | T              | Cep120 | Reg variation    | mus_musculus |       |         |       |          |
| 18 | 53745832 | rs30067063               | A                     | G              | Cep120 | Reg variation    | mus_musculus |       |         |       |          |
| 18 | 53745967 | rs47346422               | A                     | C              | Cep120 | Reg variation    | mus_musculus |       |         |       |          |
| 18 | 53746341 | rs237738051              | C                     | T              | Cep120 | Reg variation    | mus_musculus |       |         |       |          |
| 18 | 65801490 | rs37276386               | C                     | T              | Sec11c | missense_variant | mus_musculus | -0.27 | Neutral | 0.004 | Damaging |
| 18 | 65798614 | rs258402644              | CA                    | C              | Sec11c | Reg variation    | mus_musculus |       |         |       |          |
| 18 | 65799200 | rs243488280              | GT                    | G              | Sec11c | Reg variation    | mus_musculus |       |         |       |          |
| 18 | 65801122 | rs250236378              | C                     | CT             | Sec11c | Reg variation    | mus_musculus |       |         |       |          |
| 18 | 65801176 | rs226721954              | TG                    | T              | Sec11c | Reg variation    | mus_musculus |       |         |       |          |
| 18 | 65802217 | rs215639908              | G                     | GA             | Sec11c | Reg variation    | mus_musculus |       |         |       |          |
| 18 | 65802236 | rs229885087              | C                     | CT             | Sec11c | Reg variation    | mus_musculus |       |         |       |          |
| 18 | 65802858 | rs236966672              | TTTCTTTGTTTTTG        | T              | Sec11c | Reg variation    | mus_musculus |       |         |       |          |
| 18 | 65803596 | rs253908978; rs253556318 | T                     | TTTGG          | Sec11c | Reg variation    | mus_musculus |       |         |       |          |
| 18 | 65805030 | rs247068214; rs246195371 | TCACACACACA           | T              | Sec11c | Reg variation    | mus_musculus |       |         |       |          |
| 18 | 65805982 | rs244311863              | A                     | AGCAGGGCTAAGTG | Sec11c | Reg variation    | mus_musculus |       |         |       |          |
| 18 | 65809563 | rs226898843              | TCCTACC               | T              | Sec11c | Reg variation    | mus_musculus |       |         |       |          |
| 18 | 65810665 | rs227224588              | GAGACAGAC             | G              | Sec11c | Reg variation    | mus_musculus |       |         |       |          |
| 18 | 65810882 | rs248836304              | TC                    | T              | Sec11c | Reg variation    | mus_musculus |       |         |       |          |
| 18 | 65810947 | rs250076478; rs215016055 | GAAAC                 | G              | Sec11c | Reg variation    | mus_musculus |       |         |       |          |
| 18 | 65811149 | rs237359227              | TCAAGATTACCTTTGGTAGAA | T              | Sec11c | Reg variation    | mus_musculus |       |         |       |          |
| 18 | 65812613 | rs252197161              | CT                    | C              | Sec11c | Reg variation    | mus_musculus |       |         |       |          |
| 18 | 65812956 | rs229279459              | A                     | ATT            | Sec11c | Reg variation    | mus_musculus |       |         |       |          |
| 18 | 65798591 | rs231416781              | T                     | C              | Sec11c | Reg variation    | mus_musculus |       |         |       |          |
| 18 | 65798627 | rs249247210              | T                     | C              | Sec11c | Reg variation    | mus_musculus |       |         |       |          |
| 18 | 65798729 | rs249178317              | T                     | C              | Sec11c | Reg variation    | mus_musculus |       |         |       |          |
| 18 | 65798768 | rs215499873              | A                     | G              | Sec11c | Reg variation    | mus_musculus |       |         |       |          |
| 18 | 65798770 | rs235162802              | C                     | T              | Sec11c | Reg variation    | mus_musculus |       |         |       |          |
| 18 | 65798843 | rs223010094              | T                     | C              | Sec11c | Reg variation    | mus_musculus |       |         |       |          |
| 18 | 65798848 | rs236001818              | T                     | C              | Sec11c | Reg variation    | mus_musculus |       |         |       |          |
| 18 | 65798895 | rs221877943              | G                     | A              | Sec11c | Reg variation    | mus_musculus |       |         |       |          |
| 18 | 65799082 | rs37862600               | T                     | C              | Sec11c | Reg variation    | mus_musculus |       |         |       |          |
| 18 | 65799251 | rs230933397              | A                     | T              | Sec11c | Reg variation    | mus_musculus |       |         |       |          |
| 18 | 65799253 | rs253002280              | T                     | C              | Sec11c | Reg variation    | mus_musculus |       |         |       |          |
| 18 | 65799389 | rs249089318              | G                     | T              | Sec11c | Reg variation    | mus_musculus |       |         |       |          |
| 18 | 65799412 | rs215442254              | C                     | A              | Sec11c | Reg variation    | mus_musculus |       |         |       |          |
| 18 | 65799497 | rs251041599              | C                     | T              | Sec11c | Reg variation    | mus_musculus |       |         |       |          |
| 18 | 65799518 | rs214784548              | G                     | A              | Sec11c | Reg variation    | mus_musculus |       |         |       |          |
| 18 | 65799590 | rs36259541               | T                     | G              | Sec11c | Reg variation    | mus_musculus |       |         |       |          |
| 18 | 65799656 | rs221346157              | C                     | T              | Sec11c | Reg variation    | mus_musculus |       |         |       |          |
| 18 | 65799669 | rs245951972              | A                     | C              | Sec11c | Reg variation    | mus_musculus |       |         |       |          |
| 18 | 65799745 | rs257812175              | T                     | C              | Sec11c | Reg variation    | mus_musculus |       |         |       |          |
| 18 | 65799881 | rs38021433               | C                     | T              | Sec11c | Reg variation    | mus_musculus |       |         |       |          |
| 18 | 65799890 | rs242912326              | G                     | A              | Sec11c | Reg variation    | mus_musculus |       |         |       |          |
| 18 | 65799910 | rs259409495              | T                     | C              | Sec11c | Reg variation    | mus_musculus |       |         |       |          |
| 18 | 65799991 | rs36821821               | C                     | T              | Sec11c | Reg variation    | mus_musculus |       |         |       |          |
| 18 | 65800005 | rs36882963               | T                     | C              | Sec11c | Reg variation    | mus_musculus |       |         |       |          |
| 18 | 65800440 | rs38202712               | C                     | T              | Sec11c | Reg variation    | mus_musculus |       |         |       |          |
| 18 | 65800841 | rs39549713               | G                     | A              | Sec11c | Reg variation    | mus_musculus |       |         |       |          |
| 18 | 65800875 | rs38137824               | T                     | C              | Sec11c | Reg variation    | mus_musculus |       |         |       |          |
| 18 | 65800941 | rs258625619              | C                     | T              | Sec11c | Reg variation    | mus_musculus |       |         |       |          |

|    |          |             |   |   |        |               |              |  |  |  |  |
|----|----------|-------------|---|---|--------|---------------|--------------|--|--|--|--|
| 18 | 65801029 | rs39153156  | G | A | Sec11c | Reg variation | mus_musculus |  |  |  |  |
| 18 | 65801089 | rs38596104  | A | T | Sec11c | Reg variation | mus_musculus |  |  |  |  |
| 18 | 65801188 | rs583897576 | G | A | Sec11c | Reg variation | mus_musculus |  |  |  |  |
| 18 | 65801226 | rs254346923 | G | T | Sec11c | Reg variation | mus_musculus |  |  |  |  |
| 18 | 65801229 | rs222755390 | T | G | Sec11c | Reg variation | mus_musculus |  |  |  |  |
| 18 | 65801720 | rs255979123 | T | G | Sec11c | Reg variation | mus_musculus |  |  |  |  |
| 18 | 65802177 | rs36312959  | C | A | Sec11c | Reg variation | mus_musculus |  |  |  |  |
| 18 | 65802198 | rs236932427 | C | T | Sec11c | Reg variation | mus_musculus |  |  |  |  |
| 18 | 65802490 | rs37513073  | T | G | Sec11c | Reg variation | mus_musculus |  |  |  |  |
| 18 | 65802712 | rs37050840  | T | G | Sec11c | Reg variation | mus_musculus |  |  |  |  |
| 18 | 65802723 | rs227346212 | C | T | Sec11c | Reg variation | mus_musculus |  |  |  |  |
| 18 | 65802851 | rs584950541 | G | T | Sec11c | Reg variation | mus_musculus |  |  |  |  |
| 18 | 65802888 | rs386951122 | T | G | Sec11c | Reg variation | mus_musculus |  |  |  |  |
| 18 | 65802889 | rs387330983 | T | G | Sec11c | Reg variation | mus_musculus |  |  |  |  |
| 18 | 65802951 | rs238103636 | T | C | Sec11c | Reg variation | mus_musculus |  |  |  |  |
| 18 | 65803049 | rs258042546 | C | T | Sec11c | Reg variation | mus_musculus |  |  |  |  |
| 18 | 65804068 | rs6308466   | G | A | Sec11c | Reg variation | mus_musculus |  |  |  |  |
| 18 | 65804428 | rs6310523   | G | A | Sec11c | Reg variation | mus_musculus |  |  |  |  |
| 18 | 65804850 | rs262305116 | G | A | Sec11c | Reg variation | mus_musculus |  |  |  |  |
| 18 | 65805669 | rs246811625 | C | T | Sec11c | Reg variation | mus_musculus |  |  |  |  |
| 18 | 65805803 | rs48108737  | T | C | Sec11c | Reg variation | mus_musculus |  |  |  |  |
| 18 | 65809015 | rs250553202 | T | C | Sec11c | Reg variation | mus_musculus |  |  |  |  |
| 18 | 65809082 | rs36263481  | C | T | Sec11c | Reg variation | mus_musculus |  |  |  |  |
| 18 | 65809100 | rs36663817  | A | G | Sec11c | Reg variation | mus_musculus |  |  |  |  |
| 18 | 65809117 | rs262972772 | G | A | Sec11c | Reg variation | mus_musculus |  |  |  |  |
| 18 | 65809247 | rs37300874  | A | G | Sec11c | Reg variation | mus_musculus |  |  |  |  |
| 18 | 65809378 | rs36792074  | G | T | Sec11c | Reg variation | mus_musculus |  |  |  |  |
| 18 | 65809575 | rs218169145 | T | C | Sec11c | Reg variation | mus_musculus |  |  |  |  |
| 18 | 65809606 | rs237096552 | G | A | Sec11c | Reg variation | mus_musculus |  |  |  |  |
| 18 | 65809650 | rs38051563  | C | T | Sec11c | Reg variation | mus_musculus |  |  |  |  |
| 18 | 65809737 | rs38303877  | C | G | Sec11c | Reg variation | mus_musculus |  |  |  |  |
| 18 | 65809840 | rs224815424 | T | C | Sec11c | Reg variation | mus_musculus |  |  |  |  |
| 18 | 65809862 | rs247992401 | A | G | Sec11c | Reg variation | mus_musculus |  |  |  |  |
| 18 | 65809876 | rs231629109 | C | T | Sec11c | Reg variation | mus_musculus |  |  |  |  |
| 18 | 65809933 | rs216766638 | T | A | Sec11c | Reg variation | mus_musculus |  |  |  |  |
| 18 | 65809981 | rs36638702  | C | T | Sec11c | Reg variation | mus_musculus |  |  |  |  |
| 18 | 65810045 | rs37041261  | G | A | Sec11c | Reg variation | mus_musculus |  |  |  |  |
| 18 | 65810141 | rs38134534  | C | A | Sec11c | Reg variation | mus_musculus |  |  |  |  |
| 18 | 65810143 | rs255782972 | G | A | Sec11c | Reg variation | mus_musculus |  |  |  |  |
| 18 | 65810313 | rs37903622  | C | T | Sec11c | Reg variation | mus_musculus |  |  |  |  |
| 18 | 65810444 | rs37435520  | A | G | Sec11c | Reg variation | mus_musculus |  |  |  |  |
| 18 | 65810539 | rs36992041  | G | T | Sec11c | Reg variation | mus_musculus |  |  |  |  |
| 18 | 65810569 | rs36298790  | G | A | Sec11c | Reg variation | mus_musculus |  |  |  |  |
| 18 | 65810896 | rs387571337 | A | T | Sec11c | Reg variation | mus_musculus |  |  |  |  |
| 18 | 65810899 | rs37212512  | C | T | Sec11c | Reg variation | mus_musculus |  |  |  |  |
| 18 | 65811134 | rs224047675 | G | A | Sec11c | Reg variation | mus_musculus |  |  |  |  |
| 18 | 65811200 | rs36453231  | C | T | Sec11c | Reg variation | mus_musculus |  |  |  |  |
| 18 | 65811348 | rs38115217  | G | A | Sec11c | Reg variation | mus_musculus |  |  |  |  |
| 18 | 65811388 | rs39301766  | G | C | Sec11c | Reg variation | mus_musculus |  |  |  |  |
| 18 | 65811854 | rs39420906  | C | T | Sec11c | Reg variation | mus_musculus |  |  |  |  |
| 18 | 65811949 | rs36990729  | A | T | Sec11c | Reg variation | mus_musculus |  |  |  |  |
| 18 | 65812130 | rs219926524 | C | G | Sec11c | Reg variation | mus_musculus |  |  |  |  |
| 18 | 65812136 | rs37737561  | G | C | Sec11c | Reg variation | mus_musculus |  |  |  |  |
| 18 | 65812273 | rs36276911  | T | C | Sec11c | Reg variation | mus_musculus |  |  |  |  |

|    |          |             |   |   |        |                               |              |  |  |  |  |
|----|----------|-------------|---|---|--------|-------------------------------|--------------|--|--|--|--|
| 18 | 65812614 | rs229920450 | T | C | Sec11c | Reg variation                 | mus_musculus |  |  |  |  |
| 18 | 65812917 | rs36896429  | C | T | Sec11c | Reg variation                 | mus_musculus |  |  |  |  |
| 18 | 65812931 | rs38168784  | T | G | Sec11c | Reg variation                 | mus_musculus |  |  |  |  |
| 18 | 65812942 | rs37151371  | A | C | Sec11c | Reg variation                 | mus_musculus |  |  |  |  |
| 18 | 65813422 | rs224293604 | C | T | Sec11c | Reg variation                 | mus_musculus |  |  |  |  |
| 18 | 65813431 | rs36558031  | A | G | Sec11c | Reg variation                 | mus_musculus |  |  |  |  |
| 18 | 65813498 | rs38083782  | T | C | Sec11c | Reg variation                 | mus_musculus |  |  |  |  |
| 18 | 65813697 | rs255906339 | G | A | Sec11c | Reg variation                 | mus_musculus |  |  |  |  |
| 18 | 65813879 | rs36942345  | G | A | Sec11c | Reg variation                 | mus_musculus |  |  |  |  |
| 18 | 65814137 | rs13471923  | T | C | Sec11c | Reg variation                 | mus_musculus |  |  |  |  |
| 18 | 65814147 | rs13471924  | G | A | Sec11c | Reg variation                 | mus_musculus |  |  |  |  |
| 18 | 65814160 | rs221710363 | G | A | Sec11c | Reg variation                 | mus_musculus |  |  |  |  |
| 18 | 65814271 | rs36574801  | G | A | Sec11c | Reg variation                 | mus_musculus |  |  |  |  |
| 18 | 65814279 | rs233647894 | C | A | Sec11c | Reg variation                 | mus_musculus |  |  |  |  |
| 18 | 65814316 | rs39350281  | C | A | Sec11c | Reg variation                 | mus_musculus |  |  |  |  |
| 18 | 65814742 | rs36763435  | A | G | Sec11c | Reg variation                 | mus_musculus |  |  |  |  |
| 18 | 65814779 | rs36376741  | T | C | Sec11c | Reg variation                 | mus_musculus |  |  |  |  |
| 18 | 65815017 | rs38165352  | A | T | Sec11c | Reg variation                 | mus_musculus |  |  |  |  |
| 18 | 65815041 | rs38583541  | G | A | Sec11c | Reg variation                 | mus_musculus |  |  |  |  |
| 18 | 65815695 | rs29673100  | T | C | Sec11c | Reg variation                 | mus_musculus |  |  |  |  |
| 18 | 65815730 | rs36328706  | T | C | Sec11c | Reg variation                 | mus_musculus |  |  |  |  |
| 18 | 65815775 | rs239635225 | C | T | Sec11c | Reg variation                 | mus_musculus |  |  |  |  |
| 18 | 65815780 | rs229223337 | T | G | Sec11c | Reg variation                 | mus_musculus |  |  |  |  |
| 18 | 65816220 | rs37539394  | T | C | Sec11c | Reg variation                 | mus_musculus |  |  |  |  |
| 18 | 65816554 | rs37303001  | A | G | Sec11c | Reg variation                 | mus_musculus |  |  |  |  |
| 18 | 65816661 | rs39048010  | T | A | Sec11c | Reg variation                 | mus_musculus |  |  |  |  |
| 18 | 65816727 | rs36950512  | A | G | Sec11c | Reg variation                 | mus_musculus |  |  |  |  |
| 18 | 65817077 | rs38181188  | C | T | Sec11c | Reg variation                 | mus_musculus |  |  |  |  |
| 18 | 65817102 | rs37305957  | G | A | Sec11c | Reg variation                 | mus_musculus |  |  |  |  |
| 18 | 65817147 | rs37436107  | G | A | Sec11c | Reg variation                 | mus_musculus |  |  |  |  |
| 18 | 65817394 | rs38364630  | A | G | Sec11c | Reg variation                 | mus_musculus |  |  |  |  |
| 18 | 65817432 | rs36670447  | A | G | Sec11c | Reg variation                 | mus_musculus |  |  |  |  |
| 18 | 65817439 | rs259843023 | T | C | Sec11c | Reg variation                 | mus_musculus |  |  |  |  |
| 18 | 65817443 | rs215080366 | T | C | Sec11c | Reg variation                 | mus_musculus |  |  |  |  |
| 18 | 59211042 | rs1517037   | C | T | SEC11C |                               | homo sapiens |  |  |  |  |
| 18 | 59212595 | rs9319943   | T | C | SEC11C |                               | homo sapiens |  |  |  |  |
| 19 | 52263563 | rs30904311  | A | G | Ins1   | Reg variation                 | mus_musculus |  |  |  |  |
| 19 | 12927601 | rs3111316   | G | A | FARSA  | downstream_gene_variant       | homo sapiens |  |  |  |  |
| 19 | 12827657 | rs755734872 | C | T | FARSA  | non_coding_transcript_variant | homo sapiens |  |  |  |  |
| 19 | 12827657 | rs755734872 | C | T | FARSA  | downstream_gene_variant       | homo sapiens |  |  |  |  |
| 19 | 12927601 | rs3111316   | G | A | FARSA  | non_coding_transcript_variant | homo sapiens |  |  |  |  |
| 19 | 12927601 | rs3111316   | G | A | FARSA  | NMD_transcript_variant        | homo sapiens |  |  |  |  |
| 19 | 12827657 | rs755734872 | C | T | FARSA  | intron_variant                | homo sapiens |  |  |  |  |
| 19 | 12927601 | rs3111316   | G | A | FARSA  | intron_variant                | homo sapiens |  |  |  |  |
| 19 | 45669020 | rs11671664  | G | A | GIPR   | upstream_gene_variant         | homo sapiens |  |  |  |  |
| 19 | 45675403 | rs2238689   | T | C | GIPR   | upstream_gene_variant         | homo sapiens |  |  |  |  |
| 19 | 45675403 | rs2238689   | T | C | GIPR   | intron_variant                | homo sapiens |  |  |  |  |
| 19 | 45848579 | rs533172266 | C | T | GIPR   | NMD_transcript_variant        | homo sapiens |  |  |  |  |
| 19 | 45669020 | rs11671664  | G | A | GIPR   | intron_variant                | homo sapiens |  |  |  |  |
| 19 | 45669020 | rs11671664  | G | A | GIPR   | NMD_transcript_variant        | homo sapiens |  |  |  |  |
| 19 | 45675403 | rs2238689   | T | C | GIPR   | downstream_gene_variant       | homo sapiens |  |  |  |  |
| 19 | 45653761 | rs10406431  | A | G | GIPR   | downstream_gene_variant       | homo sapiens |  |  |  |  |
| 19 | 45675403 | rs2238689   | T | C | GIPR   | NMD_transcript_variant        | homo sapiens |  |  |  |  |
| 19 | 45848579 | rs533172266 | C | T | GIPR   | non_coding_transcript_variant | homo sapiens |  |  |  |  |

|    |          |             |            |                                                 |        |                                    |              |  |  |  |  |
|----|----------|-------------|------------|-------------------------------------------------|--------|------------------------------------|--------------|--|--|--|--|
| 19 | 45654670 | rs113036890 | CAAAAAAAAA | C, CA, CAAAA, CAAAAA, CAAAAAA, CAAAAAAA, CAAAAA | GIPR   | downstream_gene_variant            | homo sapiens |  |  |  |  |
| 19 | 45657402 | rs10404333  | G          | A                                               | GIPR   |                                    | homo sapiens |  |  |  |  |
| 19 | 45653979 | rs10407429  | G          | A                                               | GIPR   | downstream_gene_variant            | homo sapiens |  |  |  |  |
| 19 | 45663346 | rs77300780  | C          | T                                               | GIPR   | upstream_gene_variant              | homo sapiens |  |  |  |  |
| 19 | 45675403 | rs2238689   | T          | C                                               | GIPR   | non_coding_transcript_exon_variant | homo sapiens |  |  |  |  |
| 19 | 45848579 | rs533172266 | C          | T                                               | GIPR   | downstream_gene_variant            | homo sapiens |  |  |  |  |
| 19 | 45654658 | rs7507912   | G          | A                                               | GIPR   | downstream_gene_variant            | homo sapiens |  |  |  |  |
| 19 | 45655159 | rs8107527   | G          | A                                               | GIPR   | downstream_gene_variant            | homo sapiens |  |  |  |  |
| 19 | 45912438 | rs9967620   | C          | A, G, T                                         | GIPR   | downstream_gene_variant            | homo sapiens |  |  |  |  |
| 19 | 45655255 | rs8108269   | T          | G                                               | GIPR   | downstream_gene_variant            | homo sapiens |  |  |  |  |
| 19 | 45848579 | rs533172266 | C          | T                                               | GIPR   | intron_variant                     | homo sapiens |  |  |  |  |
| 20 | 58902122 | rs11477757  | TCC        | T, TC, TCCCC                                    | GNAS   | non_coding_transcript_variant      | homo sapiens |  |  |  |  |
| 20 | 58902122 | rs11477757  | TCC        | T, TC, TCCCC                                    | GNAS   | intron_variant                     | homo sapiens |  |  |  |  |
| 20 | 58902122 | rs11477757  | TCC        | T, TC, TCCCC                                    | GNAS   | upstream_gene_variant              | homo sapiens |  |  |  |  |
| 20 | 58902122 | rs11477757  | TCC        | T, TC, TCCCC                                    | GNAS   | downstream_gene_variant            | homo sapiens |  |  |  |  |
| 20 | 58819573 | rs6070625   | C          | G                                               | GNAS   | upstream_gene_variant              | homo sapiens |  |  |  |  |
| 20 | 58902122 | rs11477757  | TCC        | T, TC, TCCCC                                    | GNAS   | NMD_transcript_variant             | homo sapiens |  |  |  |  |
| 20 | 58819573 | rs6070625   | C          | G                                               | GNAS   | non_coding_transcript_variant      | homo sapiens |  |  |  |  |
| 20 | 58976044 | rs862016    | G          | A                                               | GNAS   |                                    | homo sapiens |  |  |  |  |
| 20 | 58819573 | rs6070625   | C          | G                                               | GNAS   | intron_variant                     | homo sapiens |  |  |  |  |
| X  | 48833101 | rs6609798   | C          | A, G, T                                         | PCSK1N | downstream_gene_variant            | homo sapiens |  |  |  |  |
| X  | 48833101 | rs6609798   | C          | A, G, T                                         | PCSK1N | non_coding_transcript_variant      | homo sapiens |  |  |  |  |
| X  | 48833101 | rs6609798   | C          | A, G, T                                         | PCSK1N | intron_variant                     | homo sapiens |  |  |  |  |
