# Supplementary material
Source: publisher figshare collection journal article supplement (https://diabetesjournals.figshare.com/articles/dataset/_/20080700)
Supplement: Supplementary file 4 [file 1]

**Supplemental Table 4. Differentially expressed genes in the OB versus NZO *Beta1* cluster.** Also shown are their assignment to biological function or cellular compartment, and association with cilia (according to *Cildb*) and B6-NZO QTL. Related to Figure 2.

| Symbol                  | p-value   | coef   | FDR       | Higher expressed in | ID                  | Entrez.Gene.Name                                                         | Annotation                 | Associated to cilia | Located in QTL          |
|-------------------------|-----------|--------|-----------|---------------------|---------------------|--------------------------------------------------------------------------|----------------------------|---------------------|-------------------------|
| <i>Akap13</i>           | 3.05E-250 | 0.237  | 6.39E-248 | NZO                 | ENSMUSG00000066406  | A-kinase anchoring protein 13                                            | Others                     | No                  | No                      |
| <i>Atf5</i>             | 2.06E-116 | 0.35   | 1.13E-114 | NZO                 | ENSMUSG00000038539  | activating transcription factor 5                                        | Transcriptional regulator  | No                  | No                      |
| <i>Atp5e</i>            | 5.62E-94  | 0.647  | 2.41E-92  | NZO                 | ENSMUSG00000016252  | ATP synthase. H+ transporting. mitochondrial F1 complex. epsilon subunit | Transporter                | No                  | No                      |
| <i>Atp5mc1</i>          | 0.00E+00  | 0.852  | 0.00E+00  | NZO                 | ENSMUSG00000006057  | ATP synthase membrane subunit c locus 1                                  | Transporter                | No                  | Blood glucose / Insulin |
| <i>Atp5mg</i>           | 6.43E-13  | 0.359  | 3.34E-12  | NZO                 | ENSMUSG00000038717  | ATP synthase membrane subunit g                                          | Enzyme                     | Yes                 | Pancreatic insulin      |
| <i>Bace2</i>            | 4.76E-170 | -0.241 | 4.77E-168 | OB                  | ENSMUSG00000040605  | beta-secretase 2                                                         | Peptidase                  | No                  | No                      |
| <i>BC004004/C6orf89</i> | 0.00E+00  | 0.429  | 0.00E+00  | NZO                 | ENSMUSG00000052712  | chromosome 6 open reading frame 89                                       | Golgi                      | No                  | C0                      |
| <i>Calr</i>             | 7.01E-243 | 0.672  | 1.39E-240 | NZO                 | ENSMUSG00000003814  | calreticulin                                                             | Transcription regulator    | Yes                 | No                      |
| <i>Camk2n1</i>          | 2.76E-269 | -0.504 | 6.28E-267 | OB                  | ENSMUSG00000046447  | calcium/calmodulin dependent protein kinase II inhibitor 1               | Kinase                     | No                  | Lean mass               |
| <i>Canx</i>             | 1.65E-47  | 0.757  | 2.90E-46  | NZO                 | ENSMUSG00000020368  | calnexin                                                                 | Endoplasmatic reticulum    | Yes                 | No                      |
| <i>Ccnd2</i>            | 4.35E-223 | 0.667  | 7.52E-221 | NZO                 | ENSMUSG00000000184  | cyclin D2                                                                | Chromatin                  | Yes                 | No                      |
| <i>Ckb</i>              | 3.84E-178 | 0.494  | 4.05E-176 | NZO                 | ENSMUSG000000001270 | creatine kinase B                                                        | Kinase                     | Yes                 | No                      |
| <i>Cox6a2</i>           | 8.46E-229 | 0.204  | 1.49E-226 | NZO                 | ENSMUSG00000030785  | cytochrome c oxidase subunit 6A2                                         | Enzyme                     | Yes                 | No                      |
| <i>Cox8a</i>            | 7.08E-04  | -0.242 | 1.50E-03  | OB                  | ENSMUSG00000035885  | cytochrome c oxidase subunit 8A                                          | Enzyme                     | No                  | No                      |
| <i>Cst3</i>             | 0.00E+00  | 0.673  | 0.00E+00  | NZO                 | ENSMUSG00000027447  | cystatin C                                                               | Golgi                      | Yes                 | No                      |
| <i>Ddc</i>              | 1.15E-35  | -0.241 | 1.52E-34  | OB                  | ENSMUSG00000020182  | dopa decarboxylase                                                       | Enzyme                     | Yes                 | No                      |
| <i>Dnaja1</i>           | 3.13E-69  | 0.262  | 8.69E-68  | NZO                 | ENSMUSG00000028410  | DnaJ heat shock protein family (Hsp40) member A1                         | Apoptosis                  | Yes                 | Body weight             |
| <i>Dnabj9</i>           | 5.25E-189 | 0.323  | 6.25E-187 | NZO                 | ENSMUSG00000014905  | DnaJ heat shock protein family (Hsp40) member B9                         | Endoplasmatic reticulum    | No                  | Body weight             |
| <i>Edem2</i>            | 5.48E-222 | 0.243  | 9.37E-220 | NZO                 | ENSMUSG00000038312  | ER degradation enhancing alpha-mannosidase like protein 2                | Enzyme                     | No                  | No                      |
| <i>Ero1b</i>            | 2.68E-11  | -0.445 | 1.26E-10  | OB                  | ENSMUSG00000057069  | endoplasmic reticulum oxidoreductase 1 beta                              | Enzyme                     | Yes                 | No                      |
| <i>Fkbp11</i>           | 5.27E-252 | 0.287  | 1.12E-249 | NZO                 | ENSMUSG00000003355  | FKBP prolyl isomerase 11                                                 | Enzyme                     | No                  | No                      |
| <i>Fkbp2</i>            | 1.82E-91  | 0.659  | 7.38E-90  | NZO                 | ENSMUSG00000056629  | FKBP prolyl isomerase 2                                                  | Enzyme                     | Yes                 | No                      |
| <i>Ftl</i>              | 4.33E-69  | 0.418  | 1.19E-67  | NZO                 | ENSMUSG00000050708  | ferritin light chain                                                     | Enzyme                     | Yes                 | No                      |
| <i>Fxyd6</i>            | 0.00E+00  | -0.397 | 0.00E+00  | OB                  | ENSMUSG00000066705  | FXYD domain containing ion transport regulator 6                         | Ion channel                | No                  | Pancreatic insulin      |
| <i>G6pc2</i>            | 5.39E-86  | -0.542 | 2.00E-84  | OB                  | ENSMUSG00000005232  | glucose-6-phosphatase catalytic subunit 2                                | Phosphatase                | No                  | No                      |
| <i>Gapdh</i>            | 5.70E-05  | 0.207  | 1.44E-04  | NZO                 | ENSMUSG00000057666  | glyceraldehyde-3-phosphate dehydrogenase                                 | Enzyme                     | Yes                 | No                      |
| <i>Gcg</i>              | 2.42E-32  | 0.393  | 2.89E-31  | NZO                 | ENSMUSG00000000394  | glucagon                                                                 | Hormone activity           | No                  | No                      |
| <i>Gfpt1</i>            | 2.65E-60  | 0.201  | 6.12E-59  | NZO                 | ENSMUSG00000029992  | glutamine--fructose-6-phosphate transaminase 1                           | Enzyme                     | No                  | Arginine                |
| <i>Glp1r</i>            | 8.66E-87  | -0.456 | 3.29E-85  | OB                  | ENSMUSG00000024027  | glucagon like peptide 1 receptor                                         | G-protein coupled receptor | No                  | No                      |
| <i>Gm8797</i>           | 0.00E+00  | 0.356  | 0.00E+00  | NZO                 | ENSMUSG000000103034 | ubiquitin B pseudogene                                                   | Others                     | No                  | No                      |
| <i>Golga4</i>           | 1.01E-44  | 0.249  | 1.67E-43  | NZO                 | ENSMUSG00000038708  | golgin A4                                                                | Golgi                      | Yes                 | No                      |
| <i>Golgb1</i>           | 3.76E-56  | 0.365  | 8.08E-55  | NZO                 | ENSMUSG00000034243  | golgin B1                                                                | Golgi                      | Yes                 | No                      |
| <i>H2bc10</i>           | 0.00E+00  | -0.227 | 0.00E+00  | OB                  | ENSMUSG00000018102  | H2B clustered histone 10                                                 | Other                      | Yes                 | No                      |
| <i>H3-3a/H3-3b</i>      | 0.00E+00  | -0.241 | 0.00E+00  | OB                  | ENSMUSG00000060743  | H3.3 histone A                                                           | Other                      | Yes                 | Blood glucose           |
| <i>Hdlbp</i>            | 7.32E-297 | 0.341  | 1.86E-294 | NZO                 | ENSMUSG00000034088  | high density lipoprotein binding protein                                 | Transport                  | Yes                 | Blood glucose           |
| <i>Hla-a</i>            | 0.00E+00  | -0.209 | 0.00E+00  | OB                  | ENSMUSG000000073411 | major histocompatibility complex. class I. A                             | Golgi                      | Yes                 | No                      |
| <i>Hla-a</i>            | 0.00E+00  | -0.963 | 0.00E+00  | OB                  | ENSMUSG000000061232 | major histocompatibility complex. class I. A                             | Golgi                      | Yes                 | No                      |
| <i>Hmgn3</i>            | 0.00E+00  | -0.215 | 0.00E+00  | OB                  | ENSMUSG000000066456 | high mobility group nucleosomal binding domain 3                         | Chromatin                  | Yes                 | Liver weight            |
| <i>Hsp90aa1</i>         | 3.62E-242 | 0.786  | 7.11E-240 | NZO                 | ENSMUSG000000021270 | heat shock protein 90 alpha family class A member 1                      | Enzyme                     | Yes                 | No                      |
| <i>Hsp90ab1</i>         | 8.19E-19  | 0.24   | 5.89E-18  | NZO                 | ENSMUSG000000023944 | heat shock protein 90 alpha family class B member 1                      | Enzyme                     | Yes                 | No                      |
| <i>Hspa13</i>           | 0.00E+00  | 0.345  | 0.00E+00  | NZO                 | ENSMUSG00000032932  | heat shock protein family A (Hsp70) member 13                            | Endoplasmatic reticulum    | Yes                 | No                      |
| <i>Hspa5</i>            | 3.59E-237 | 0.879  | 6.72E-235 | NZO                 | ENSMUSG00000026864  | heat shock protein family A (Hsp70) member 5                             | Enzyme                     | Yes                 | No                      |
| <i>Hyoul</i>            | 2.93E-194 | 0.224  | 3.74E-192 | NZO                 | ENSMUSG00000032115  | hypoxia up-regulated 1                                                   | Endoplasmatic reticulum    | Yes                 | Pancreatic insulin      |
| <i>Iapp</i>             | 0.00E+00  | -0.467 | 0.00E+00  | OB                  | ENSMUSG000000041681 | islet amyloid polypeptide                                                | Hormone activity           | No                  | No                      |
| <i>Isl1</i>             | 0.00E+00  | -0.207 | 0.00E+00  | OB                  | ENSMUSG000000042258 | ISL LIM homeobox 1                                                       | Transcription regulator    | Yes                 | No                      |
| <i>Itm2b</i>            | 5.49E-314 | -0.389 | 1.54E-311 | OB                  | ENSMUSG000000022108 | integral membrane protein 2B                                             | Golgi                      | Yes                 | No                      |
| <i>Kcnk16</i>           | 5.72E-199 | 0.258  | 7.61E-197 | NZO                 | ENSMUSG000000023387 | potassium two pore domain channel subfamily K member 16                  | Ion channel                | No                  | Fat mass                |
| <i>Kdelr2</i>           | 2.51E-77  | 0.23   | 8.24E-76  | NZO                 | ENSMUSG000000079111 | KDEL endoplasmic reticulum protein retention receptor 2                  | Endoplasmatic reticulum    | Yes                 | No                      |
| <i>Lman1</i>            | 6.45E-27  | 0.219  | 6.50E-26  | NZO                 | ENSMUSG000000041891 | lectin. mannose binding 1                                                | Transport                  | Yes                 | No                      |
| <i>Mlec</i>             | 1.71E-113 | 0.235  | 9.07E-112 | NZO                 | ENSMUSG000000048578 | malectin                                                                 | Endoplasmatic reticulum    | Yes                 | Cholesterol             |

|                                |           |        |           |     |                    |                                                       |                           |     |                                     |
|--------------------------------|-----------|--------|-----------|-----|--------------------|-------------------------------------------------------|---------------------------|-----|-------------------------------------|
| <i>Mt1</i>                     | 0.00E+00  | -0.951 | 0.00E+00  | OB  | ENSMUSG00000031765 | metallothionein 1                                     | Others                    | No  | No                                  |
| <i>Mt2</i>                     | 2.84E-176 | -0.251 | 2.95E-174 | OB  | ENSMUSG00000031762 | metallothionein 2                                     | Others                    | No  | No                                  |
| <i>Mt-atp6</i>                 | 1.24E-84  | -0.3   | 4.52E-83  | OB  | ENSMUSG00000064357 | ATP synthase F0 subunit 6                             | Transporter               | No  | No                                  |
| <i>mt-Co1</i>                  | 2.58E-111 | -0.298 | 1.34E-109 | OB  | ENSMUSG00000064351 | cytochrome c oxidase subunit I                        | Mitochondrial             | No  | No                                  |
| <i>Mt-co2</i>                  | 1.08E-119 | -0.354 | 6.27E-118 | OB  | ENSMUSG00000064354 | cytochrome c oxidase subunit II                       | Enzyme                    | Yes | No                                  |
| <i>mt-Co3</i>                  | 2.96E-109 | -0.325 | 1.47E-107 | OB  | ENSMUSG00000064358 | cytochrome c oxidase III                              | Mitochondrial             | No  | No                                  |
| <i>mt-Cyb</i>                  | 8.04E-76  | -0.276 | 2.61E-74  | OB  | ENSMUSG00000064370 | cytochrome b                                          | Mitochondrial             | No  | No                                  |
| <i>mt-Nd1</i>                  | 0.00E+00  | -0.662 | 0.00E+00  | OB  | ENSMUSG00000064341 | NADH dehydrogenase, subunit 1 (complex I)             | Mitochondrial             | No  | No                                  |
| <i>mt-Nd2</i>                  | 0.00E+00  | -0.594 | 0.00E+00  | OB  | ENSMUSG00000064345 | MTND2                                                 | Mitochondrial             | No  | No                                  |
| <i>mt-Nd3</i>                  | 0.00E+00  | -0.856 | 0.00E+00  | OB  | ENSMUSG00000064360 | NADH dehydrogenase, subunit 3 (complex I)             | Mitochondrial             | No  | No                                  |
| <i>mt-Nd4</i>                  | 4.35E-134 | -0.361 | 3.10E-132 | OB  | ENSMUSG00000064363 | NADH dehydrogenase, subunit 4 (complex I)             | Mitochondrial             | No  | No                                  |
| <i>mt-Nd4l</i>                 | 7.23E-142 | -0.678 | 5.74E-140 | OB  | ENSMUSG00000065947 | NADH dehydrogenase, subunit 4L (complex I)            | Mitochondrial             | No  | No                                  |
| <i>mt-Nd5</i>                  | 8.01E-247 | -0.393 | 1.66E-244 | OB  | ENSMUSG00000064367 | NADH dehydrogenase, subunit 5 (complex I)             | Mitochondrial             | No  | No                                  |
| <i>Naca</i>                    | 8.33E-139 | -0.381 | 6.35E-137 | OB  | ENSMUSG00000061315 | nascent polypeptide associated complex subunit alpha  | Transcription regulator   | Yes | No                                  |
| <i>Ndufa7</i>                  | 0.00E+00  | -0.222 | 0.00E+00  | OB  | ENSMUSG00000041881 | NADH:ubiquinone oxidoreductase subunit A7             | Enzyme                    | No  | No                                  |
| <i>Ndufb11</i>                 | 2.90E-18  | 0.386  | 2.03E-17  | NZO | ENSMUSG00000031059 | NADH:ubiquinone oxidoreductase subunit B11            | Enzyme                    | Yes | No                                  |
| <i>Ndufs2</i>                  | 0.00E+00  | 1.276  | 0.00E+00  | NZO | ENSMUSG00000013593 | NADH:ubiquinone oxidoreductase core subunit S2        | Enzyme                    | Yes | Blood glucose                       |
| <i>Ndufv3</i>                  | 3.47E-23  | 0.308  | 3.04E-22  | NZO | ENSMUSG00000024038 | NADH:ubiquinone oxidoreductase subunit V3             | Enzyme                    | No  | No                                  |
| <i>Nupr1</i>                   | 0.00E+00  | 1.258  | 0.00E+00  | NZO | ENSMUSG00000030717 | nuclear protein 1, transcriptional regulator          | Transcriptional regulator | No  | No                                  |
| <i>Oaz1</i>                    | 3.91E-118 | -0.377 | 2.20E-116 | OB  | ENSMUSG00000035242 | ornithine decarboxylase antizyme 1                    | Enzyme                    | No  | No                                  |
| <i>P4hb</i>                    | 7.99E-158 | 0.676  | 7.22E-156 | NZO | ENSMUSG00000025130 | prolyl 4-hydroxylase subunit beta                     | Enzyme                    | Yes | No                                  |
| <i>Ppia</i>                    | 3.18E-150 | -0.847 | 2.78E-148 | OB  | ENSMUSG00000071866 | peptidylprolyl isomerase A                            | Enzyme                    | Yes | No                                  |
| <i>Ppp1r1a</i>                 | 1.93E-55  | 0.414  | 4.04E-54  | NZO | ENSMUSG00000022490 | protein phosphatase 1 regulatory inhibitor subunit 1A | Phosphatase               | No  | No                                  |
| <i>Prlr</i>                    | 1.75E-231 | 0.283  | 3.13E-229 | NZO | ENSMUSG00000005268 | prolactin receptor                                    | Transmembrane receptor    | No  | No                                  |
| <i>Psap</i>                    | 2.54E-14  | 0.488  | 1.43E-13  | NZO | ENSMUSG00000004207 | prosaposin                                            | Enzyme                    | Yes | No                                  |
| <i>Ptma (includes others)</i>  | 1.90E-205 | -0.606 | 2.64E-203 | OB  | ENSMUSG00000026238 | prothymosin alpha                                     | Other                     | Yes | Blood glucose                       |
| <i>Pyy</i>                     | 1.82E-59  | -0.253 | 4.14E-58  | OB  | ENSMUSG00000017311 | peptide YY                                            | Hormone activity          | No  | Blood glucose / Fasting insulin     |
| <i>Resp18</i>                  | 0.00E+00  | -1.354 | 0.00E+00  | OB  | ENSMUSG00000033061 | regulated endocrine specific protein 18               | Golgi                     | No  | Blood glucose                       |
| <i>Rgs2</i>                    | 1.94E-168 | -0.456 | 1.91E-166 | OB  | ENSMUSG00000026360 | regulator of G protein signaling 2                    | Enzyme                    | Yes | Blood glucose                       |
| <i>Rnase4</i>                  | 0.00E+00  | 0.8    | 0.00E+00  | NZO | ENSMUSG00000021876 | ribonuclease A family member 4                        | Enzyme                    | No  | No                                  |
| <i>Rpl10</i>                   | 1.56E-47  | -0.533 | 2.76E-46  | OB  | ENSMUSG00000008682 | ribosomal protein L10                                 | Ribosomal                 | Yes | No                                  |
| <i>Rpl17</i>                   | 3.76E-14  | -0.248 | 2.09E-13  | OB  | ENSMUSG00000062328 | ribosomal protein L17                                 | Ribosomal                 | Yes | Liver weight                        |
| <i>Rpl21</i>                   | 0.00E+00  | -0.782 | 0.00E+00  | OB  | ENSMUSG00000041453 | ribosomal protein L21                                 | Ribosomal                 | Yes | No                                  |
| <i>Rpl23</i>                   | 4.94E-82  | -0.344 | 1.73E-80  | OB  | ENSMUSG00000071415 | ribosomal protein L23                                 | Ribosomal                 | Yes | Blood glucose / Fasting insulin     |
| <i>Rpl24</i>                   | 1.87E-72  | 0.292  | 5.62E-71  | NZO | ENSMUSG00000098274 | ribosomal protein L24                                 | Ribosomal                 | Yes | No                                  |
| <i>Rpl26</i>                   | 0.00E+00  | -0.666 | 0.00E+00  | OB  | ENSMUSG00000060938 | ribosomal protein L26                                 | Ribosomal                 | Yes | Fasting insulin                     |
| <i>Rpl29 (includes others)</i> | 0.00E+00  | -1.190 | 0.00E+00  | OB  | ENSMUSG00000048758 | ribosomal protein L29                                 | Ribosomal                 | Yes | No                                  |
| <i>Rpl30</i>                   | 6.74E-52  | -0.547 | 1.31E-50  | OB  | ENSMUSG00000058600 | ribosomal protein L30                                 | Ribosomal                 | Yes | Creatinine 18                       |
| <i>Rpl31</i>                   | 5.38E-03  | 0.378  | 9.59E-03  | NZO | ENSMUSG00000073702 | ribosomal protein L31                                 | Ribosomal                 | Yes | No                                  |
| <i>Rpl32</i>                   | 2.47E-20  | -0.426 | 1.90E-19  | OB  | ENSMUSG00000057841 | ribosomal protein L32                                 | Ribosomal                 | Yes | Arginine                            |
| <i>Rpl35</i>                   | 2.91E-05  | 0.259  | 7.62E-05  | NZO | ENSMUSG00000062997 | ribosomal protein L35                                 | Ribosomal                 | Yes | No                                  |
| <i>Rpl35a</i>                  | 0.00E+00  | -0.992 | 0.00E+00  | OB  | ENSMUSG00000060636 | ribosomal protein L35a                                | Ribosomal                 | Yes | No                                  |
| <i>Rpl38</i>                   | 2.90E-11  | 0.309  | 1.36E-10  | NZO | ENSMUSG00000057322 | ribosomal protein L38                                 | Ribosomal                 | Yes | No                                  |
| <i>Rpl4</i>                    | 4.00E-14  | 0.211  | 2.22E-13  | NZO | ENSMUSG00000032399 | ribosomal protein L4                                  | Ribosomal                 | Yes | Ratio liver weight vs blood glucose |
| <i>Rpl6</i>                    | 3.03E-27  | 0.205  | 3.09E-26  | NZO | ENSMUSG00000029614 | ribosomal protein L6                                  | Ribosomal                 | Yes | Cholesterol                         |
| <i>Rpl7</i>                    | 3.99E-70  | -0.223 | 1.13E-68  | OB  | ENSMUSG00000043716 | ribosomal protein L7                                  | Transcription regulator   | Yes | No                                  |
| <i>Rpl8</i>                    | 2.09E-19  | 0.271  | 1.54E-18  | NZO | ENSMUSG00000003970 | ribosomal protein L8                                  | Ribosomal                 | Yes | scWAT weight                        |
| <i>Rpl9</i>                    | 1.60E-92  | -0.614 | 6.70E-91  | OB  | ENSMUSG00000047215 | ribosomal protein L9                                  | Ribosomal                 | Yes | Cholesterol                         |
| <i>Rplp1 (includes others)</i> | 3.19E-175 | 0.431  | 3.29E-173 | NZO | ENSMUSG00000007892 | ribosomal protein, large, P1                          | Ribosomal                 | Yes | Ratio liver weight vs blood glucose |
| <i>Rps13</i>                   | 4.60E-47  | -0.515 | 8.01E-46  | OB  | ENSMUSG00000090862 | ribosomal protein S13                                 | Ribosomal                 | Yes | No                                  |
| <i>Rps15a</i>                  | 3.90E-68  | 0.24   | 1.05E-66  | NZO | ENSMUSG00000008683 | ribosomal protein S15a                                | Ribosomal                 | Yes | No                                  |
| <i>Rps17</i>                   | 9.83E-19  | 0.226  | 7.03E-18  | NZO | ENSMUSG00000061787 | ribosomal protein S17                                 | Ribosomal                 | Yes | No                                  |
| <i>Rps18</i>                   | 0.00E+00  | -1.063 | 0.00E+00  | OB  | ENSMUSG00000008668 | ribosomal protein S18                                 | Ribosomal                 | Yes | No                                  |
| <i>Rps19</i>                   | 4.52E-16  | 0.442  | 2.84E-15  | NZO | ENSMUSG00000040952 | ribosomal protein S19                                 | Ribosomal                 | Yes | No                                  |

|                                 |           |        |           |     |                    |                                                                 |                         |     |                 |
|---------------------------------|-----------|--------|-----------|-----|--------------------|-----------------------------------------------------------------|-------------------------|-----|-----------------|
| <i>Rps2</i>                     | 0.00E+00  | -0.27  | 0.00E+00  | OB  | ENSMUSG00000044533 | ribosomal protein S2                                            | Ribosomal               | Yes | No              |
| <i>Rps23</i>                    | 6.89E-27  | 0.382  | 6.91E-26  | NZO | ENSMUSG00000049517 | ribosomal protein S23                                           | Ribosomal               | Yes | No              |
| <i>Rps27/Rps27rt</i>            | 1.21E-08  | 0.206  | 4.61E-08  | NZO | ENSMUSG00000090733 | ribosomal protein S27                                           | Ribosomal               | Yes | No              |
| <i>Rps28</i>                    | 3.09E-37  | 0.286  | 4.26E-36  | NZO | ENSMUSG00000067288 | ribosomal protein S28                                           | Ribosomal               | Yes | No              |
| <i>Rps29</i>                    | 8.68E-114 | 0.379  | 4.62E-112 | NZO | ENSMUSG00000034892 | ribosomal protein S29                                           | Ribosomal               | No  | Arginine        |
| <i>Rps3</i>                     | 1.32E-24  | -0.443 | 1.23E-23  | OB  | ENSMUSG00000030744 | ribosomal protein S3                                            | Ribosomal               | Yes | No              |
| <i>Rps5</i>                     | 7.85E-15  | -0.531 | 4.59E-14  | OB  | ENSMUSG00000012848 | ribosomal protein S5                                            | Ribosomal               | Yes | No              |
| <i>Rps7</i>                     | 9.07E-192 | -0.268 | 1.14E-189 | OB  | ENSMUSG00000061477 | ribosomal protein S7                                            | Ribosomal               | Yes | Arginine        |
| <i>Rpsa</i>                     | 7.40E-15  | 0.236  | 4.32E-14  | NZO | ENSMUSG00000032518 | ribosomal protein SA                                            | Ribosomal               | Yes | No              |
| <i>Rrbp1</i>                    | 2.65E-44  | 0.512  | 4.33E-43  | NZO | ENSMUSG00000027422 | ribosome binding protein 1                                      | Transport               | Yes | Plasma glycerol |
| <i>Scg2</i>                     | 1.83E-205 | -0.367 | 2.56E-203 | OB  | ENSMUSG00000050711 | secretogranin II                                                | Cytokine                | No  | Blood glucose   |
| <i>Scg5</i>                     | 0.00E+00  | 0.761  | 0.00E+00  | NZO | ENSMUSG00000023236 | secretogranin V                                                 | Transport               | Yes | Plasma glycerol |
| <i>Sec61a1</i>                  | 4.98E-238 | 0.464  | 9.54E-236 | NZO | ENSMUSG00000030082 | SEC61 translocon subunit alpha 1                                | Transport               | Yes | Arginine        |
| <i>Sec61b</i>                   | 7.15E-43  | 0.25   | 1.13E-41  | NZO | ENSMUSG00000053317 | SEC61 translocon subunit beta                                   | Transporter             | No  | Body weight     |
| <i>Sec61g</i>                   | 8.47E-23  | 0.574  | 7.27E-22  | NZO | ENSMUSG00000078974 | SEC61 translocon subunit gamma                                  | Transporter             | No  | No              |
| <i>Selenop</i>                  | 9.35E-94  | 0.306  | 3.98E-92  | NZO | ENSMUSG00000064373 | selenoprotein P                                                 | Others                  | No  | No              |
| <i>Selenos</i>                  | 1.80E-159 | 0.212  | 1.65E-157 | NZO | ENSMUSG00000075701 | selenoprotein S                                                 | Endoplasmatic reticulum | No  | No              |
| <i>Slc2a2</i>                   | 0.00E+00  | -0.683 | 0.00E+00  | OB  | ENSMUSG00000027690 | solute carrier family 2 member 2                                | Transporter             | No  | No              |
| <i>Slc30a8</i>                  | 0.00E+00  | -0.749 | 0.00E+00  | OB  | ENSMUSG00000022315 | solute carrier family 30 member 8                               | Transporter             | No  | No              |
| <i>Spock2</i>                   | 3.46E-140 | -0.202 | 2.69E-138 | OB  | ENSMUSG00000058297 | SPARC (osteonectin). cwcv and kazal like domains proteoglycan 2 | Other                   | Yes | No              |
| <i>Tgoln1</i>                   | 6.01E-47  | 0.205  | 1.04E-45  | NZO | ENSMUSG00000056429 | trans-golgi network protein                                     | Golgi                   | No  | Arginine        |
| <i>Tmsb4x (includes others)</i> | 2.39E-186 | -0.254 | 2.74E-184 | OB  | ENSMUSG00000049775 | thymosin. beta 4. X chromosome                                  | Others                  | No  | No              |
| <i>Txnip</i>                    | 6.93E-29  | -0.24  | 7.45E-28  | OB  | ENSMUSG00000038393 | thioredoxin interacting protein                                 | Apoptosis               | Yes | No              |
| <i>Ubxn4</i>                    | 7.82E-120 | 0.207  | 4.58E-118 | NZO | ENSMUSG00000026353 | UBX domain protein 4                                            | Endoplasmatic reticulum | Yes | Blood glucose   |
| <i>Ucn3</i>                     | 1.73E-199 | -0.363 | 2.32E-197 | OB  | ENSMUSG00000044988 | urocortin 3                                                     | Hormone activity        | No  | No              |
| <i>Uqcrcq</i>                   | 1.39E-185 | 0.258  | 1.58E-183 | NZO | ENSMUSG00000044894 | ubiquinol-cytochrome c reductase complex III subunit VII        | Enzyme                  | No  | No              |
| <i>Vcp</i>                      | 3.59E-269 | 0.228  | 8.06E-267 | NZO | ENSMUSG00000028452 | valosin containing protein                                      | Enzyme                  | Yes | Body weight     |
