# Supplementary material
Source: publisher figshare collection journal article supplement (https://diabetesjournals.figshare.com/articles/dataset/_/20080700)
Supplement: Supplementary file 6 [file 1]

**Supplemental Table 2. Marker genes used for initial cluster identification.** Marker genes were primarily based on Baron et al. (2016), with adaptations from Martens et al. (2011). *Related to Figure 1.*

| Cell type            | Marker1       | Marker2        | Marker3       | Marker4       | Marker5       | Marker6     | Marker7    | Marker8     | Marker9     | Marker10       |
|----------------------|---------------|----------------|---------------|---------------|---------------|-------------|------------|-------------|-------------|----------------|
| Alpha                | <i>Mafb</i>   | <i>Gcg</i>     | <i>Irx1</i>   | <i>Irx2</i>   |               |             |            |             |             |                |
| Beta                 | <i>Ins1</i>   | <i>Ins2</i>    | <i>Iapp</i>   | <i>Pdx1</i>   | <i>Nkx6-1</i> | <i>Mafa</i> | <i>Dcx</i> | <i>Fosb</i> | <i>St18</i> | <i>Ppp1r1a</i> |
| Delta                | <i>Sst</i>    | <i>Neurog3</i> |               |               |               |             |            |             |             |                |
| Gamma                | <i>Ppy</i>    | <i>Arx</i>     | <i>Pou6f2</i> |               |               |             |            |             |             |                |
| Epsilon              | <i>Ghrl</i>   |                |               |               |               |             |            |             |             |                |
| Acinar & macrophages | <i>Ptprc</i>  | <i>Lyz2</i>    |               |               |               |             |            |             |             |                |
| Endothelia           | <i>Pecam1</i> | <i>Sparc</i>   |               |               |               |             |            |             |             |                |
| Quiescent stellate   | <i>Rgs5</i>   | <i>Col4a1</i>  | <i>Ednrb</i>  | <i>Pdgfrb</i> |               |             |            |             |             |                |
