# Supplementary material
Source: publisher figshare collection journal article supplement (https://diabetesjournals.figshare.com/articles/dataset/_/20080700)
Supplement: Supplementary file 8 [file 1]

**Supplemental Table 1. List of antibodies for immunoblotting.**

| <b>Antibody</b>                                            | <b>Vendor</b>           | <b>Catalogue #</b> | <b>Dilution</b> |
|------------------------------------------------------------|-------------------------|--------------------|-----------------|
| Rabbit anti cleaved caspase 3                              | Cell Signaling          | 9661S              | 1:1,000         |
| Rabbit anti phospho-eIF2 $\alpha$                          | Cell Signaling          | 3597               | 1:1,000         |
| Mouse anti eIF2 $\alpha$                                   | Cell Signaling          | 2103               | 1:1,000         |
| Rabbit anti GLUT2                                          | self-made               | -                  | 1:500           |
| Mouse anti $\alpha$ -Tubulin                               | Sigma                   | T6074              | 1:500           |
| Mouse anti-Vinculin                                        | Santa Cruz              | sc-73614           | 1:500           |
| Goat anti Rabbit IgG (H+L), DyLight 800 4X PEG             | Thermo Scientific       | SA5-35571          | 1:10,000        |
| Goat anti Rabbit IgG DyLight TM 680                        | Thermo Scientific       | 35568              | 1:10,000        |
| IRDye® 800CW Donkey anti-Mouse IgG (H + L)                 | LiCor                   | P/N 926-32212      | 1:10,000        |
| Goat anti-Mouse IgG (H+L), DyLight 680                     | Thermo Scientific       | 35519              | 1:10,000        |
| Peroxidase-conjugated AffiniPure Goat Anti-Rabbit IgG(H+L) | Jackson Immuno Research | 111-035-003        | 1:20,000        |
