# Supplementary material
Source: publisher figshare collection journal article supplement (https://diabetesjournals.figshare.com/articles/dataset/_/20080700)
Supplement: Supplementary file 9 [file 1]

**Supplemental Table 3. Diet- and strain-dependent differences in endocrine cell composition.** Proportions of pancreatic cells in the four experimental groups (OB -CH, OB +CH, NZO -CH, and NZO +CH) are shown in percent (number of cells in brackets). For every group, cells from n = 3 mice were pooled.

|                | <i>Beta1</i> | <i>Beta2</i> | <i>Beta3</i> | <i>Beta4</i> | <i>Beta5</i> | <i>BetaP</i> | <i>Alpha</i> | <i>Delta</i> | <i>Gamma</i> | <i>AGD1</i> | <i>AGD2</i> | <i>BDG</i> | <i>BG</i>  | <i>Endothelial</i> | <i>Acinar &amp; Macrophage</i> | <i>Stellate</i> |
|----------------|--------------|--------------|--------------|--------------|--------------|--------------|--------------|--------------|--------------|-------------|-------------|------------|------------|--------------------|--------------------------------|-----------------|
| <b>OB -CH</b>  | 56.3% (2751) | 1.3% (65)    | 0.3% (14)    | 0.7% (33)    | 7.3% (359)   | 0.0% (1)     | 13.5% (658)  | 3.5% (170)   | 1.2% (58)    | 1.4% (66)   | 1.5% (74)   | 2.2% (106) | 4.4% (217) | 2.8% (137)         | 2.3% (113)                     | 1.3% (63)       |
| <b>OB +CH</b>  | 5.0% (190)   | 2.8% (106)   | 8.3% (316)   | 46.1% (1744) | 4.4% (166)   | 2.6% (98)    | 8.8% (334)   | 2.7% (102)   | 0.9% (33)    | 2.1% (81)   | 0.7% (26)   | 1.1% (43)  | 5.7% (214) | 2.9% (111)         | 3.6% (136)                     | 2.3% (87)       |
| <b>NZO -CH</b> | 46.2% (1832) | 9.4% (371)   | 3.1% (121)   | 0.5% (19)    | 3.8% (152)   | 0.3% (12)    | 20.2% (801)  | 1.7% (69)    | 1.8% (71)    | 1.8% (73)   | 0.5% (19)   | 1.5% (61)  | 1.4% (55)  | 3.6% (142)         | 1.4% (54)                      | 2.8% (112)      |
| <b>NZO +CH</b> | 8.4% (571)   | 26.9% (1828) | 32.0% (2178) | 1.9% (127)   | 2.2% (149)   | 1.6% (108)   | 11.3% (766)  | 2.1% (145)   | 1.2% (80)    | 1.3% (87)   | 1.3% (88)   | 1.4% (96)  | 1.9% (126) | 2.8% (189)         | 1.2% (83)                      | 2.7% (183)      |
