# Supplementary material
Source: publisher figshare collection journal article supplement (https://diabetesjournals.figshare.com/articles/dataset/_/20080700)
Supplement: Supplementary file 10 [file 1]

**Supplemental Table 7. List of gene modules and hub genes of the *Beta4* cluster.** 9714 genes were not assigned to any module. *Related to Figure 5.*

| Module | # of genes in module | Mean connectivity | Hub genes                           | DEG Hubs                   | Fold enrichment of DEGs (p-value) | Fold enrichment of surface markers (p-value) | Top 5 KEGG pathways                                                                                                                                                     |
|--------|----------------------|-------------------|-------------------------------------|----------------------------|-----------------------------------|----------------------------------------------|-------------------------------------------------------------------------------------------------------------------------------------------------------------------------|
| M1     | 1249                 | 0.0017            | <i>Rpl13, Rpl19, Rps13</i>          | <i>Rpl13, Rps13, Rpl15</i> | 14 (4.7e-67***)                   | 2.8 (1.9e-21***)                             | Ribosome, Oxidative phosphorylation, Parkinson's disease, Alzheimer's disease, Huntington's disease                                                                     |
| M2     | 865                  | 0.0013            | <i>Dad1</i>                         | <i>Dad1</i>                | 12 (5.5e-49***)                   | 4.8 (2e-43***)                               | Protein processing in endoplasmic reticulum, Protein export, N-Glycan biosynthesis, Lysosome, Proteasome                                                                |
| M3     | 370                  | 0.0021            | <i>Ercc6l, Bub1, Mcm10</i>          |                            | --                                | 2.2 (9.1e-05***)                             | Spliceosome, Cell cycle, Glucagon signaling pathway, Oocyte meiosis, Thyroid hormone signaling pathway                                                                  |
| M4     | 347                  | 0.011             | <i>Sell, Ifi213, Prkcq</i>          |                            | --                                | --                                           | Leukocyte transendothelial migration, Primary immunodeficiency, Cell adhesion molecules (CAMs), Axon guidance, Adherens junction                                        |
| M5     | 306                  | 0.006             | <i>Wfdc18, Ctse, Slc45a3</i>        |                            | --                                | --                                           | Retrograde endocannabinoid signaling, Inflammatory mediator regulation of TRP channels, GABAergic synapse, Morphine addiction                                           |
| M6     | 303                  | 0.0019            | <i>Uhrf1, Trip13</i>                |                            | --                                | 1.7 (0.027*)                                 | Spliceosome, FoxO signaling pathway, Gap junction, GnRH signaling pathway, Signaling pathways regulating pluripotency of stem cells                                     |
| M7     | 285                  | 0.0094            | <i>Kcne4, Jph2, Pcdh18</i>          |                            | --                                | --                                           | Focal adhesion, Platelet activation, ECM-receptor interaction, Gastric acid secretion, cGMP-PKG signaling pathway                                                       |
| M8     | 269                  | 0.0062            | <i>Prelp, Pof1b, Bche</i>           |                            | --                                | --                                           | PI3K-Akt signaling pathway, Gastric acid secretion, Ras signaling pathway, AMPK signaling pathway, Axon guidance                                                        |
| M9     | 253                  | 0.0089            | <i>Ddr2, Slc30a10, Rbm46</i>        |                            | --                                | --                                           | Vascular smooth muscle contraction, cGMP-PKG signaling pathway, Platelet activation, Protein digestion and absorption, Calcium signaling pathway                        |
| M10    | 200                  | 0.0073            | <i>Ifit3b, Ifit3, Irf7</i>          |                            | 1.4 (0.37)                        | --                                           | Herpes simplex infection, Influenza A, Measles, Antigen processing and presentation, Hepatitis C                                                                        |
| M11    | 165                  | 0.017             | <i>Trim30b, Wdfy4, Cxcl9</i>        |                            | --                                | --                                           | Intestinal immune network for IgA production, Rheumatoid arthritis, Graft-versus-host disease, Cytokine-cytokine receptor interaction, Inflammatory bowel disease (IBD) |
| M12    | 162                  | 0.0082            | <i>Sox17, Prrg1, Tbx3</i>           |                            | --                                | --                                           | ECM-receptor interaction, Rap1 signaling pathway, Ras signaling pathway                                                                                                 |
| M13    | 117                  | 0.0019            | <i>B3gnt7, Dcst1, Akr1b7</i>        |                            | --                                | --                                           |                                                                                                                                                                         |
| M14    | 114                  | 0.002             | <i>Hal, Olfr961</i>                 |                            | --                                | --                                           |                                                                                                                                                                         |
| M15    | 112                  | 0.0061            | <i>mt-Co3, mt-Nd1</i>               | <i>mt-Nd1</i>              | 5.6 (0.00018***)                  | 2.7 (0.0024**)                               | Parkinson's disease, Oxidative phosphorylation, Alzheimer's disease, Cardiac muscle contraction, Huntington's disease                                                   |
| M16    | 112                  | 0.0071            | <i>Gulp1, Hmcn1, Mertk</i>          |                            | --                                | --                                           |                                                                                                                                                                         |
| M17    | 109                  | 0.0029            | <i>Flvcr2, 1700028P14Rik, Cxcl1</i> |                            | --                                | --                                           |                                                                                                                                                                         |
| M18    | 70                   | 0.017             | <i>Clec5a, Clec4a2, Lt4r1</i>       |                            | --                                | --                                           | Osteoclast differentiation                                                                                                                                              |
