# Supplementary material
Source: publisher figshare collection journal article supplement (https://diabetesjournals.figshare.com/articles/dataset/_/20080700)
Supplement: Supplementary file 11 [file 1]

**Supplemental Table 8. List of ligand-receptor co-expression common to *Beta1-4* clusters with other endocrine clusters. Related to Figure 6 .**

| FROM_TO                                                                                         | Interaction     |
|-------------------------------------------------------------------------------------------------|-----------------|
| Beta1.Delta_Beta2.Delta_Beta3.Delta_Beta4.Delta                                                 | COPA_EGFR       |
| Beta1.Delta_Beta2.Delta_Beta3.Delta_Beta4.Delta                                                 | PTN_PLXNB2      |
| Beta1.Delta_Beta2.Delta_Beta3.Delta_Beta4.Delta                                                 | HGF_MET         |
| Beta1.Delta_Beta2.Delta_Beta3.Delta_Beta4.Delta                                                 | FGF1_FGFR1      |
| Beta1.Delta_Beta2.Delta_Beta3.Delta_Beta4.Delta                                                 | FGF1_TGFR3      |
| Beta1.Delta_Beta2.Delta_Beta3.Delta_Beta4.Delta                                                 | INS_IDE         |
| Beta1.Delta_Beta2.Delta_Beta3.Delta_Beta4.Delta                                                 | INS_INSR        |
| Beta1.Delta_Beta2.Delta_Beta3.Delta_Beta4.Delta                                                 | RSPO4_LGR4      |
| Beta1.Delta_Beta2.Delta_Delta.Beta2_Beta3.Delta_Beta4.Delta_Delta.Beta4                         | SEMA4G_PLXNB2   |
| Beta1.Delta_Delta.Beta1_Beta2.Delta_Beta3.Delta_Beta4.Delta_Delta.Beta4                         | NECTIN3_NECTIN1 |
| Beta1.Delta_Delta.Beta1_Beta2.Delta_Delta.Beta2_Beta3.Delta_Delta.Beta3_Beta4.Delta_Delta.Beta4 | NECTIN3_NECTIN2 |
| Delta.Beta1_Delta.Beta2_Delta.Beta3_Beta4.Delta_Delta.Beta4                                     | FGF9_FGFR1      |
| Delta.Beta1_Delta.Beta2_Delta.Beta3_Delta.Beta4                                                 | SEMA3C_NRP2     |
| Delta.Beta1_Delta.Beta2_Delta.Beta3_Delta.Beta4                                                 | KL_FGFR1        |
| Delta.Beta1_Delta.Beta2_Delta.Beta3_Delta.Beta4                                                 | EFNB1_EPHB2     |
| Delta.Beta1_Delta.Beta2_Delta.Beta3_Delta.Beta4                                                 | SIRPG_CD47      |
| Delta.Beta1_Delta.Beta2_Delta.Beta3_Delta.Beta4                                                 | TNFSF10_RIPK1   |
| Delta.Beta1_Delta.Beta2_Delta.Beta3_Delta.Beta4                                                 | PTN_PTPRS       |
| Delta.Beta1_Delta.Beta2_Delta.Beta3_Delta.Beta4                                                 | CD44_HBEGF      |
| Delta.Beta1_Delta.Beta2_Delta.Beta3_Delta.Beta4                                                 | PLXNB2_SEMA4D   |
| Beta1.BG_Beta2.BG_Beta3.BG_Beta4.BG                                                             | WNT4_NOTCH1     |
| Beta1.BG_Beta2.BG_Beta3.BG_Beta4.BG                                                             | INS_IDE         |
| Beta1.BG_Beta2.BG_Beta3.BG_Beta4.BG                                                             | INS_INSR        |
| Beta1.BG_Beta2.BG_Beta3.BG_Beta4.BG_BG.Beta4                                                    | COPA_EGFR       |
| Beta1.BG_Beta2.BG_Beta3.BG_BG.Beta3_BG.Beta4                                                    | EGF_EGFR        |
| Beta1.BG_Beta2.BG_BG.Beta2_Beta3.BG_BG.Beta3_Beta4.BG_BG.Beta4                                  | MIF_EGFR        |
| Beta1.BG_Beta2.BG_BG.Beta2_Beta3.BG_BG.Beta3_Beta4.BG_BG.Beta4                                  | EGFR_HBEGF      |
| Beta1.BG_BG.Beta1_Beta2.BG_Beta3.BG_Beta4.BG_BG.Beta4                                           | FGF1_TGFR3      |
| Beta1.BG_BG.Beta1_Beta2.BG_Beta3.BG_BG.Beta3_Beta4.BG_BG.Beta4                                  | NECTIN3_NECTIN1 |
| Beta1.BG_BG.Beta1_Beta2.BG_BG.Beta2_Beta3.BG_BG.Beta3_Beta4.BG_BG.Beta4                         | NECTIN3_NECTIN2 |
| Beta1.BG_BG.Beta1_Beta2.BG_BG.Beta2_Beta3.BG_BG.Beta3_Beta4.BG_BG.Beta4                         | RSPO4_LGR4      |
| Beta1.BG_BG.Beta1_Beta2.BG_BG.Beta2_BG.Beta3_BG.Beta4                                           | WNT4_FZD8       |
| Beta1.BG_BG.Beta1_BG.Beta2_Beta3.BG_BG.Beta3_Beta4.BG_BG.Beta4                                  | CD44_HBEGF      |
| Beta1.BG_BG.Beta1_BG.Beta2_Beta4.BG_BG.Beta4                                                    | WNT4_FZD6       |
| Beta1.BG_BG.Beta1_BG.Beta2_BG.Beta3_Beta4.BG_BG.Beta4                                           | PLXNB2_SEMA4D   |
| Beta1.BG_BG.Beta2_Beta4.BG_BG.Beta4                                                             | SEMA4G_PLXNB2   |
| BG.Beta1_BG.Beta2_BG.Beta3_Beta4.BG_BG.Beta4                                                    | PLXNB1_SEMA4D   |
| BG.Beta1_BG.Beta2_BG.Beta3_BG.Beta4                                                             | SIRPG_CD47      |
